# Supplementary material for: Spatial Distribution of Pollinating Butterflies in Yunnan Province, Southwest China with Resource Conservation Implications
Source: MDPI journal article supplement (doi:10.3390/insects11080525), 2020-08-12
Supplement: s1 [file s1]

**Table S1.** Species and distribution of pollinating butterflies in Yunnan Province, China

| No. | Pollinating butterfly species                            | Family       | I               |                 |                 | II               |                  |                  |                  |                  | III               |                   |                   |                   |                   |                   |                   |                   |                   |                   | IV                |                  |                  | V               |
|-----|----------------------------------------------------------|--------------|-----------------|-----------------|-----------------|------------------|------------------|------------------|------------------|------------------|-------------------|-------------------|-------------------|-------------------|-------------------|-------------------|-------------------|-------------------|-------------------|-------------------|-------------------|------------------|------------------|-----------------|
|     |                                                          |              | I <sub>A</sub>  |                 | I <sub>B</sub>  | II <sub>A</sub>  |                  |                  | II <sub>B</sub>  |                  | III <sub>A</sub>  |                   |                   |                   | III <sub>B</sub>  |                   |                   |                   |                   |                   | IV <sub>A</sub>   |                  |                  | V <sub>A</sub>  |
|     |                                                          |              | I <sub>A1</sub> | I <sub>A2</sub> | I <sub>B1</sub> | II <sub>A1</sub> | II <sub>A2</sub> | II <sub>A3</sub> | II <sub>B1</sub> | II <sub>B2</sub> | III <sub>A1</sub> | III <sub>A2</sub> | III <sub>A3</sub> | III <sub>A4</sub> | III <sub>B1</sub> | III <sub>B2</sub> | III <sub>B3</sub> | III <sub>B4</sub> | III <sub>B5</sub> | III <sub>B6</sub> | III <sub>B7</sub> | IV <sub>A1</sub> | IV <sub>A2</sub> | V <sub>A1</sub> |
| 1   | <i>Parnassius epaphus</i> Oberthür, 1879                 | Papilionidae | 0               | 0               | 0               | 0                | 0                | 0                | 0                | 0                | 0                 | 0                 | 0                 | 0                 | 0                 | 0                 | 0                 | 0                 | 0                 | 0                 | 0                 | 0                | 0                | 1               |
| 2   | <i>Parnassius orleans</i> Oberthür, 1890                 | Papilionidae | 0               | 0               | 0               | 0                | 0                | 0                | 0                | 0                | 0                 | 0                 | 0                 | 1                 | 0                 | 0                 | 0                 | 0                 | 0                 | 0                 | 0                 | 0                | 0                | 1               |
| 3   | <i>Parnassius imperator</i> Oberthür, 1883               | Papilionidae | 0               | 0               | 0               | 0                | 0                | 0                | 0                | 0                | 0                 | 0                 | 0                 | 1                 | 0                 | 0                 | 0                 | 0                 | 0                 | 1                 | 0                 | 0                | 0                | 1               |
| 4   | <i>Parnassius simo</i> Gray, 1853                        | Papilionidae | 0               | 0               | 0               | 0                | 0                | 0                | 0                | 0                | 0                 | 0                 | 0                 | 0                 | 0                 | 0                 | 0                 | 0                 | 0                 | 0                 | 0                 | 0                | 0                | 1               |
| 5   | <i>Parnassius acco</i> Gray, 1853                        | Papilionidae | 0               | 0               | 0               | 0                | 0                | 0                | 0                | 0                | 0                 | 0                 | 0                 | 0                 | 0                 | 0                 | 0                 | 0                 | 0                 | 0                 | 0                 | 0                | 0                | 1               |
| 6   | <i>Parnassius cephalus</i> Grum-Grshimaïlo, 1891         | Papilionidae | 0               | 0               | 0               | 0                | 0                | 0                | 0                | 0                | 0                 | 0                 | 0                 | 0                 | 0                 | 0                 | 0                 | 0                 | 0                 | 1                 | 0                 | 0                | 0                | 1               |
| 7   | <i>Parnassius szechenyii</i> Frivaldszky, 1886           | Papilionidae | 0               | 0               | 0               | 0                | 0                | 0                | 0                | 0                | 0                 | 0                 | 0                 | 0                 | 0                 | 0                 | 0                 | 0                 | 0                 | 0                 | 0                 | 0                | 0                | 1               |
| 8   | <i>Bhutanitis lidderdalii</i> Atkinson, 1873             | Papilionidae | 0               | 1               | 0               | 1                | 1                | 1                | 1                | 0                | 1                 | 1                 | 1                 | 1                 | 0                 | 0                 | 0                 | 0                 | 0                 | 0                 | 0                 | 0                | 0                | 0               |
| 9   | <i>Bhutanitis thaidina</i> (Blanchard, 1871)             | Papilionidae | 0               | 0               | 0               | 0                | 0                | 0                | 0                | 0                | 0                 | 0                 | 1                 | 0                 | 0                 | 0                 | 1                 | 0                 | 0                 | 1                 | 0                 | 0                | 0                | 1               |
| 10  | <i>Bhutanitis mansfieldi</i> (Riley, 1939)               | Papilionidae | 0               | 0               | 0               | 0                | 0                | 0                | 0                | 0                | 0                 | 0                 | 0                 | 0                 | 0                 | 0                 | 0                 | 0                 | 1                 | 0                 | 0                 | 0                | 0                | 1               |
| 11  | <i>Lamproptera curius</i> (Fabricius, 1787)              | Papilionidae | 1               | 1               | 1               | 1                | 1                | 1                | 1                | 1                | 1                 | 1                 | 1                 | 0                 | 0                 | 1                 | 0                 | 1                 | 0                 | 1                 | 1                 | 0                | 0                | 0               |
| 12  | <i>Lamproptera paracurius</i> Hu, Zhang & Cotton, 2014   | Papilionidae | 0               | 0               | 0               | 0                | 0                | 0                | 0                | 0                | 0                 | 0                 | 0                 | 0                 | 0                 | 0                 | 1                 | 0                 | 0                 | 0                 | 1                 | 1                | 0                | 0               |
| 13  | <i>Lamproptera meges</i> (Zinken, 1831)                  | Papilionidae | 1               | 1               | 1               | 1                | 1                | 1                | 0                | 1                | 1                 | 1                 | 1                 | 1                 | 0                 | 0                 | 0                 | 0                 | 1                 | 1                 | 0                 | 0                | 0                | 0               |
| 14  | <i>Iphiclides podalirinus</i> (Oberthür, 1890)           | Papilionidae | 0               | 0               | 0               | 0                | 0                | 0                | 0                | 0                | 0                 | 0                 | 0                 | 0                 | 0                 | 0                 | 0                 | 0                 | 0                 | 0                 | 0                 | 0                | 0                | 1               |
| 15  | <i>Graphium mandarinus</i> (Oberthür, 1879)              | Papilionidae | 0               | 1               | 1               | 1                | 1                | 1                | 1                | 0                | 1                 | 1                 | 1                 | 1                 | 0                 | 0                 | 0                 | 0                 | 0                 | 1                 | 0                 | 0                | 0                | 1               |
| 16  | <i>Graphium confucius</i> Hu, Duan & Cotton, 2018        | Papilionidae | 1               | 1               | 1               | 1                | 1                | 1                | 1                | 1                | 1                 | 1                 | 1                 | 1                 | 1                 | 1                 | 1                 | 1                 | 1                 | 1                 | 0                 | 0                | 0                | 1               |
| 17  | <i>Graphium eurous</i> (Leech, [1893])                   | Papilionidae | 0               | 0               | 0               | 0                | 0                | 0                | 0                | 0                | 1                 | 0                 | 1                 | 0                 | 0                 | 0                 | 0                 | 0                 | 0                 | 1                 | 0                 | 0                | 0                | 1               |
| 18  | <i>Graphium sikkimica</i> (Heron, 1899)                  | Papilionidae | 0               | 0               | 0               | 0                | 0                | 0                | 0                | 0                | 0                 | 0                 | 0                 | 1                 | 0                 | 0                 | 0                 | 0                 | 0                 | 0                 | 0                 | 0                | 0                | 0               |
| 19  | <i>Graphium mullah</i> (Alphéraky, 1897)                 | Papilionidae | 0               | 0               | 0               | 0                | 0                | 0                | 0                | 0                | 0                 | 0                 | 0                 | 0                 | 0                 | 0                 | 0                 | 0                 | 0                 | 0                 | 0                 | 1                | 0                | 0               |
| 20  | <i>Graphium parus</i> (de Nicéville, 1900)               | Papilionidae | 0               | 0               | 0               | 0                | 0                | 0                | 0                | 0                | 0                 | 0                 | 1                 | 1                 | 0                 | 0                 | 0                 | 0                 | 0                 | 1                 | 0                 | 0                | 0                | 1               |
| 21  | <i>Graphium nomius</i> (Esper, 1799)                     | Papilionidae | 1               | 1               | 1               | 1                | 1                | 1                | 1                | 0                | 0                 | 0                 | 0                 | 0                 | 0                 | 0                 | 0                 | 0                 | 0                 | 0                 | 0                 | 0                | 0                | 0               |
| 22  | <i>Graphium antiphates</i> (Cramer, [1775])              | Papilionidae | 1               | 1               | 1               | 1                | 1                | 1                | 1                | 1                | 1                 | 1                 | 0                 | 0                 | 0                 | 0                 | 0                 | 0                 | 0                 | 0                 | 0                 | 0                | 0                | 0               |
| 23  | <i>Graphium agetes</i> (Westwood, 1843)                  | Papilionidae | 1               | 1               | 1               | 1                | 1                | 1                | 0                | 1                | 0                 | 0                 | 0                 | 0                 | 0                 | 0                 | 0                 | 0                 | 0                 | 0                 | 0                 | 0                | 0                | 0               |
| 24  | <i>Graphium xenocles</i> (Doubleday, 1842)               | Papilionidae | 1               | 1               | 1               | 0                | 0                | 0                | 0                | 1                | 0                 | 0                 | 0                 | 0                 | 0                 | 0                 | 0                 | 0                 | 0                 | 0                 | 0                 | 0                | 0                | 0               |
| 25  | <i>Graphium macareus</i> (Godart, 1819)                  | Papilionidae | 1               | 1               | 1               | 0                | 0                | 1                | 0                | 1                | 0                 | 1                 | 1                 | 0                 | 0                 | 0                 | 0                 | 0                 | 0                 | 1                 | 0                 | 0                | 0                | 0               |
| 26  | <i>Graphium leechi</i> (Rothschild, 1895)                | Papilionidae | 0               | 0               | 1               | 0                | 0                | 0                | 0                | 1                | 0                 | 0                 | 0                 | 0                 | 0                 | 0                 | 1                 | 0                 | 0                 | 0                 | 0                 | 1                | 0                | 0               |
| 27  | <i>Graphium chironides</i> (Honrath, 1884)               | Papilionidae | 1               | 1               | 1               | 1                | 1                | 1                | 0                | 1                | 1                 | 1                 | 1                 | 1                 | 0                 | 0                 | 0                 | 0                 | 1                 | 0                 | 0                 | 1                | 0                | 0               |
| 28  | <i>Graphium eurypylus</i> (Linnaeus, 1758)               | Papilionidae | 1               | 1               | 1               | 0                | 1                | 1                | 0                | 1                | 1                 | 1                 | 0                 | 1                 | 0                 | 0                 | 0                 | 0                 | 1                 | 0                 | 0                 | 0                | 0                | 0               |
| 29  | <i>Graphium evemon</i> (Boisduval, 1836)                 | Papilionidae | 1               | 1               | 1               | 0                | 0                | 0                | 0                | 1                | 0                 | 0                 | 0                 | 0                 | 0                 | 0                 | 0                 | 0                 | 0                 | 0                 | 0                 | 0                | 0                | 0               |
| 30  | <i>Graphium doson</i> (C. & R. Felder, 1864)             | Papilionidae | 1               | 1               | 1               | 1                | 1                | 1                | 1                | 1                | 1                 | 1                 | 1                 | 1                 | 0                 | 0                 | 0                 | 0                 | 1                 | 0                 | 0                 | 0                | 0                | 0               |
| 31  | <i>Graphium agamemnon</i> (Linnaeus, 1758)               | Papilionidae | 1               | 1               | 1               | 1                | 1                | 1                | 1                | 1                | 1                 | 1                 | 1                 | 1                 | 1                 | 1                 | 1                 | 0                 | 1                 | 0                 | 0                 | 0                | 0                | 0               |
| 32  | <i>Graphium sarpedon</i> (Linnaeus, 1758)                | Papilionidae | 1               | 1               | 1               | 1                | 1                | 1                | 1                | 1                | 1                 | 1                 | 1                 | 1                 | 1                 | 1                 | 1                 | 1                 | 1                 | 1                 | 0                 | 1                | 0                | 0               |
| 33  | <i>Graphium septentriniocolus</i> Page & Treadaway, 2013 | Papilionidae | 1               | 1               | 0               | 0                | 0                | 1                | 0                | 0                | 0                 | 0                 | 0                 | 0                 | 0                 | 0                 | 0                 | 0                 | 0                 | 0                 | 0                 | 0                | 0                | 0               |
| 34  | <i>Graphium cloanthus</i> (Westwood, 1845)               | Papilionidae | 1               | 1               | 1               | 1                | 1                | 1                | 1                | 1                | 1                 | 1                 | 1                 | 1                 | 1                 | 1                 | 1                 | 1                 | 1                 | 1                 | 0                 | 1                | 1                | 0               |
| 35  | <i>Teinopalpus imperialis</i> Hope, 1843                 | Papilionidae | 0               | 1               | 1               | 1                | 1                | 1                | 1                | 1                | 1                 | 1                 | 1                 | 1                 | 0                 | 0                 | 0                 | 0                 | 0                 | 1                 | 0                 | 1                | 0                | 0               |
| 36  | <i>Teinopalpus aureus</i> Mell, 1923                     | Papilionidae | 0               | 0               | 1               | 0                | 0                | 0                | 0                | 1                | 0                 | 0                 | 0                 | 0                 | 0                 | 0                 | 0                 | 0                 | 0                 | 0                 | 0                 | 0                | 0                | 0               |
| 37  | <i>Pachliopta aristolochiae</i> (Fabricius, 1775)        | Papilionidae | 1               | 1               | 1               | 1                | 1                | 1                | 0                | 1                | 1                 | 1                 | 1                 | 1                 | 1                 | 1                 | 0                 | 0                 | 1                 | 1                 | 1                 | 1                | 0                | 0               |
| 38  | <i>Troides helena</i> (Linnaeus, 1758)                   | Papilionidae | 1               | 1               | 1               | 0                | 1                | 1                | 0                | 1                | 1                 | 0                 | 0                 | 1                 | 0                 | 0                 | 0                 | 0                 | 0                 | 0                 | 0                 | 0                | 0                | 0               |
| 39  | <i>Troides aeacus</i> (C. & R. Felder, 1860)             | Papilionidae | 1               | 1               | 1               | 1                | 1                | 1                | 0                | 1                | 1                 | 1                 | 1                 | 1                 | 1                 | 0                 | 0                 | 0                 | 1                 | 1                 | 1                 | 1                | 0                | 0               |

| No. | Pollinating butterfly species                   | Family       | I               |                 |                 | II               |                  |                  |                  |                  | III               |                   |                   |                   |                   |                   |                   |                   |                   |                   |                   |                  |                  | IV              |  | V              |
|-----|-------------------------------------------------|--------------|-----------------|-----------------|-----------------|------------------|------------------|------------------|------------------|------------------|-------------------|-------------------|-------------------|-------------------|-------------------|-------------------|-------------------|-------------------|-------------------|-------------------|-------------------|------------------|------------------|-----------------|--|----------------|
|     |                                                 |              | I <sub>A</sub>  |                 | I <sub>B</sub>  | II <sub>A</sub>  |                  |                  | II <sub>B</sub>  |                  | III <sub>A</sub>  |                   |                   |                   | III <sub>B</sub>  |                   |                   |                   |                   |                   |                   |                  |                  | IV <sub>A</sub> |  | V <sub>A</sub> |
|     |                                                 |              | I <sub>A1</sub> | I <sub>A2</sub> | I <sub>B1</sub> | II <sub>A1</sub> | II <sub>A2</sub> | II <sub>A3</sub> | II <sub>B1</sub> | II <sub>B2</sub> | III <sub>A1</sub> | III <sub>A2</sub> | III <sub>A3</sub> | III <sub>A4</sub> | III <sub>B1</sub> | III <sub>B2</sub> | III <sub>B3</sub> | III <sub>B4</sub> | III <sub>B5</sub> | III <sub>B6</sub> | III <sub>B7</sub> | IV <sub>A1</sub> | IV <sub>A2</sub> | V <sub>A1</sub> |  |                |
| 40  | <i>Atrophaneura aidoneus</i> (Doubleday, 1845)  | Papilionidae | 1               | 1               | 1               | 1                | 1                | 1                | 0                | 1                | 1                 | 1                 | 1                 | 1                 | 0                 | 0                 | 0                 | 0                 | 0                 | 0                 | 0                 | 0                | 0                |                 |  |                |
| 41  | <i>Atrophaneura varuna</i> (White,1842)         | Papilionidae | 1               | 1               | 1               | 1                | 0                | 1                | 0                | 0                | 1                 | 0                 | 0                 | 0                 | 0                 | 0                 | 0                 | 0                 | 0                 | 0                 | 0                 | 0                | 0                |                 |  |                |
| 42  | <i>Byasa crassipes</i> (Oberthür, 1893)         | Papilionidae | 1               | 1               | 1               | 0                | 0                | 0                | 0                | 0                | 0                 | 0                 | 0                 | 0                 | 0                 | 0                 | 0                 | 0                 | 0                 | 0                 | 0                 | 0                | 0                |                 |  |                |
| 43  | <i>Byasa plutonius</i> (Oberthür, 1876)         | Papilionidae | 0               | 1               | 0               | 1                | 0                | 1                | 0                | 0                | 1                 | 1                 | 1                 | 1                 | 0                 | 0                 | 1                 | 0                 | 0                 | 1                 | 1                 | 1                | 0                |                 |  |                |
| 44  | <i>Byasa hedistus</i> (Jordan, 1928)            | Papilionidae | 0               | 0               | 1               | 0                | 1                | 0                | 1                | 1                | 1                 | 0                 | 0                 | 0                 | 1                 | 1                 | 1                 | 1                 | 1                 | 1                 | 1                 | 0                | 1                |                 |  |                |
| 45  | <i>Byasa dasarada</i> (Moore, [1858])           | Papilionidae | 1               | 1               | 0               | 1                | 1                | 1                | 0                | 0                | 1                 | 1                 | 1                 | 1                 | 0                 | 0                 | 0                 | 0                 | 0                 | 0                 | 0                 | 0                | 0                |                 |  |                |
| 46  | <i>Byasa polyeuctes</i> (Doubleday, 1842)       | Papilionidae | 1               | 1               | 1               | 1                | 1                | 1                | 1                | 1                | 1                 | 1                 | 1                 | 1                 | 1                 | 1                 | 1                 | 1                 | 1                 | 1                 | 1                 | 0                | 0                |                 |  |                |
| 47  | <i>Byasa latreillei</i> (Donovan, 1826)         | Papilionidae | 0               | 1               | 0               | 0                | 1                | 1                | 0                | 0                | 0                 | 1                 | 0                 | 1                 | 0                 | 0                 | 0                 | 0                 | 0                 | 0                 | 0                 | 0                | 0                |                 |  |                |
| 48  | <i>Byasa genestieri</i> (Oberthür, 1918)        | Papilionidae | 0               | 0               | 1               | 0                | 1                | 0                | 0                | 1                | 1                 | 0                 | 1                 | 1                 | 1                 | 1                 | 0                 | 0                 | 0                 | 1                 | 1                 | 0                | 0                |                 |  |                |
| 49  | <i>Byasa polla</i> (de Nicéville, 1897)         | Papilionidae | 0               | 1               | 0               | 0                | 0                | 1                | 0                | 0                | 1                 | 1                 | 0                 | 1                 | 0                 | 0                 | 0                 | 0                 | 0                 | 0                 | 0                 | 0                | 0                |                 |  |                |
| 50  | <i>Byasa nevillei</i> (Wood-Mason, 1882)        | Papilionidae | 1               | 1               | 1               | 1                | 1                | 0                | 0                | 0                | 1                 | 1                 | 1                 | 1                 | 1                 | 1                 | 1                 | 0                 | 0                 | 1                 | 1                 | 0                | 0                |                 |  |                |
| 51  | <i>Byasa daemonius</i> (Alphéraky, 1895)        | Papilionidae | 0               | 0               | 0               | 0                | 0                | 0                | 0                | 0                | 0                 | 0                 | 0                 | 1                 | 0                 | 0                 | 0                 | 0                 | 0                 | 1                 | 0                 | 0                | 0                |                 |  |                |
| 52  | <i>Byasa rhadinus</i> (Jordan, 1928)            | Papilionidae | 0               | 0               | 0               | 0                | 0                | 0                | 0                | 0                | 0                 | 0                 | 0                 | 0                 | 0                 | 1                 | 0                 | 0                 | 0                 | 1                 | 0                 | 0                | 0                |                 |  |                |
| 53  | <i>Byasa impediens</i> (Seitz, 1907)            | Papilionidae | 1               | 0               | 0               | 0                | 0                | 0                | 0                | 0                | 0                 | 0                 | 0                 | 0                 | 0                 | 0                 | 0                 | 0                 | 0                 | 0                 | 0                 | 0                | 0                |                 |  |                |
| 54  | <i>Meandrusa sciron</i> (Leech, 1890)           | Papilionidae | 0               | 0               | 1               | 0                | 0                | 0                | 1                | 1                | 0                 | 0                 | 0                 | 0                 | 0                 | 0                 | 1                 | 0                 | 1                 | 0                 | 0                 | 0                | 0                |                 |  |                |
| 55  | <i>Meandrusa lachinus</i> (Fruhstorfer, [1902]) | Papilionidae | 0               | 1               | 1               | 1                | 1                | 1                | 0                | 0                | 1                 | 1                 | 1                 | 1                 | 0                 | 0                 | 0                 | 0                 | 0                 | 0                 | 0                 | 0                | 0                |                 |  |                |
| 56  | <i>Meandrusa payeni</i> (Boisduval, 1836)       | Papilionidae | 1               | 1               | 1               | 1                | 1                | 1                | 0                | 1                | 0                 | 0                 | 0                 | 0                 | 0                 | 0                 | 0                 | 0                 | 0                 | 0                 | 0                 | 0                | 0                |                 |  |                |
| 57  | <i>Papilio xuthus</i> Linnaeus, 1767            | Papilionidae | 1               | 1               | 1               | 1                | 1                | 1                | 0                | 1                | 1                 | 1                 | 1                 | 1                 | 1                 | 1                 | 1                 | 1                 | 1                 | 1                 | 1                 | 1                | 1                |                 |  |                |
| 58  | <i>Papilio machaon</i> Linnaeus, 1758           | Papilionidae | 1               | 1               | 1               | 1                | 1                | 1                | 1                | 1                | 1                 | 1                 | 1                 | 1                 | 1                 | 1                 | 1                 | 1                 | 1                 | 1                 | 1                 | 1                | 1                |                 |  |                |
| 59  | <i>Papilio paris</i> Linnaeus, 1758             | Papilionidae | 1               | 1               | 1               | 1                | 1                | 1                | 1                | 1                | 1                 | 1                 | 1                 | 1                 | 0                 | 0                 | 0                 | 0                 | 1                 | 0                 | 0                 | 1                | 0                |                 |  |                |
| 60  | <i>Papilio arcturus</i> Westwood, 1842          | Papilionidae | 1               | 1               | 0               | 1                | 1                | 1                | 0                | 1                | 1                 | 1                 | 0                 | 1                 | 1                 | 0                 | 0                 | 0                 | 0                 | 1                 | 0                 | 1                | 0                |                 |  |                |
| 61  | <i>Papilio krishna</i> Moore, 1857              | Papilionidae | 0               | 1               | 0               | 0                | 0                | 1                | 0                | 0                | 1                 | 1                 | 1                 | 1                 | 0                 | 0                 | 0                 | 0                 | 0                 | 1                 | 0                 | 0                | 0                |                 |  |                |
| 62  | <i>Papilio bianor</i> Cramer, 1777              | Papilionidae | 1               | 1               | 1               | 1                | 1                | 1                | 1                | 1                | 1                 | 1                 | 1                 | 1                 | 1                 | 1                 | 1                 | 1                 | 1                 | 1                 | 1                 | 1                | 1                |                 |  |                |
| 63  | <i>Papilio dialis</i> (Leech, 1893)             | Papilionidae | 0               | 0               | 1               | 0                | 0                | 0                | 0                | 1                | 0                 | 0                 | 0                 | 0                 | 0                 | 0                 | 0                 | 0                 | 1                 | 0                 | 0                 | 0                | 0                |                 |  |                |
| 64  | <i>Papilio maackii</i> Ménétriers, 1859         | Papilionidae | 0               | 0               | 0               | 0                | 0                | 0                | 0                | 0                | 0                 | 0                 | 0                 | 1                 | 1                 | 1                 | 0                 | 1                 | 0                 | 1                 | 0                 | 1                | 0                |                 |  |                |
| 65  | <i>Papilio demoleus</i> Linnaeus, 1758          | Papilionidae | 1               | 1               | 1               | 1                | 1                | 1                | 1                | 1                | 1                 | 1                 | 1                 | 1                 | 0                 | 0                 | 0                 | 0                 | 0                 | 0                 | 0                 | 0                | 0                |                 |  |                |
| 66  | <i>Papilio noblei</i> de Nicéville, [1889]      | Papilionidae | 1               | 0               | 0               | 0                | 0                | 0                | 0                | 0                | 0                 | 0                 | 0                 | 0                 | 0                 | 0                 | 0                 | 0                 | 0                 | 0                 | 0                 | 0                | 0                |                 |  |                |
| 67  | <i>Papilio helenus</i> Linnaeus, 1758           | Papilionidae | 1               | 1               | 1               | 1                | 1                | 1                | 1                | 1                | 1                 | 1                 | 1                 | 1                 | 1                 | 1                 | 1                 | 1                 | 1                 | 1                 | 1                 | 1                | 0                |                 |  |                |
| 68  | <i>Papilio castor</i> Westwood, 1842            | Papilionidae | 1               | 0               | 0               | 0                | 0                | 0                | 0                | 0                | 0                 | 0                 | 0                 | 0                 | 0                 | 0                 | 0                 | 0                 | 0                 | 0                 | 0                 | 0                | 0                |                 |  |                |
| 69  | <i>Papilio nephelus</i> Boisduval, 1836         | Papilionidae | 1               | 1               | 1               | 1                | 1                | 1                | 1                | 1                | 1                 | 1                 | 1                 | 1                 | 0                 | 0                 | 0                 | 0                 | 0                 | 0                 | 0                 | 1                | 0                |                 |  |                |
| 70  | <i>Papilio polytes</i> Linnaeus, 1758           | Papilionidae | 1               | 1               | 1               | 1                | 1                | 1                | 1                | 1                | 1                 | 1                 | 1                 | 1                 | 1                 | 1                 | 1                 | 1                 | 1                 | 1                 | 1                 | 1                | 1                |                 |  |                |
| 71  | <i>Papilio protenor</i> Cramer, 1775            | Papilionidae | 1               | 1               | 1               | 1                | 1                | 1                | 1                | 1                | 1                 | 1                 | 1                 | 1                 | 1                 | 1                 | 1                 | 1                 | 1                 | 1                 | 1                 | 1                | 0                |                 |  |                |
| 72  | <i>Papilio alcmenor</i> C. & R. Felder, 1865    | Papilionidae | 1               | 1               | 0               | 1                | 1                | 1                | 0                | 0                | 1                 | 1                 | 1                 | 1                 | 0                 | 0                 | 0                 | 0                 | 0                 | 0                 | 0                 | 0                | 0                |                 |  |                |
| 73  | <i>Papilio bootes</i> Westwood, 1842            | Papilionidae | 0               | 1               | 1               | 1                | 1                | 1                | 0                | 1                | 1                 | 1                 | 1                 | 1                 | 1                 | 0                 | 0                 | 0                 | 0                 | 1                 | 1                 | 0                | 0                |                 |  |                |
| 74  | <i>Papilio janaka</i> Moore, 1857               | Papilionidae | 0               | 0               | 0               | 0                | 0                | 0                | 0                | 0                | 0                 | 0                 | 0                 | 1                 | 0                 | 0                 | 0                 | 0                 | 0                 | 0                 | 0                 | 0                | 0                |                 |  |                |
| 75  | <i>Papilio memnon</i> Linnaeus, 1758            | Papilionidae | 1               | 1               | 1               | 1                | 1                | 1                | 1                | 1                | 1                 | 1                 | 1                 | 1                 | 0                 | 0                 | 1                 | 0                 | 1                 | 1                 | 0                 | 1                | 0                |                 |  |                |
| 76  | <i>Papilio clytia</i> Linnaeus, 1758            | Papilionidae | 1               | 0               | 1               | 1                | 1                | 0                | 0                | 1                | 0                 | 0                 | 0                 | 0                 | 0                 | 0                 | 0                 | 0                 | 0                 | 0                 | 0                 | 0                | 0                |                 |  |                |
| 77  | <i>Papilio paradoxa</i> (Zinken, 1831)          | Papilionidae | 1               | 0               | 0               | 0                | 0                | 0                | 0                | 0                | 0                 | 0                 | 0                 | 0                 | 0                 | 0                 | 0                 | 0                 | 0                 | 0                 | 0                 | 0                | 0                |                 |  |                |
| 78  | <i>Papilio agestor</i> Gray, 1831               | Papilionidae | 1               | 0               | 0               | 1                | 0                | 0                | 0                | 1                | 1                 | 1                 | 1                 | 1                 | 0                 | 0                 | 0                 | 0                 | 0                 | 1                 | 1                 | 0                | 0                |                 |  |                |
| 79  | <i>Papilio epycides</i> Hewitson, 1864          | Papilionidae | 1               | 0               | 1               | 1                | 0                | 1                | 0                | 1                | 1                 | 1                 | 1                 | 1                 | 1                 | 0                 | 0                 | 0                 | 1                 | 1                 | 1                 | 0                | 0                |                 |  |                |

| No. | Pollinating butterfly species                | Family       | I               |                 |                 | II               |                  |                  |                  |                  | III               |                   |                   |                   |                   |                   |                   |                   |                   |                   |                   |                  |                  |                 | IV |  | V |
|-----|----------------------------------------------|--------------|-----------------|-----------------|-----------------|------------------|------------------|------------------|------------------|------------------|-------------------|-------------------|-------------------|-------------------|-------------------|-------------------|-------------------|-------------------|-------------------|-------------------|-------------------|------------------|------------------|-----------------|----|--|---|
|     |                                              |              | I <sub>A</sub>  |                 | I <sub>B</sub>  | II <sub>A</sub>  |                  |                  | II <sub>B</sub>  |                  | III <sub>A</sub>  |                   |                   |                   | III <sub>B</sub>  |                   |                   |                   |                   |                   |                   | IV <sub>A</sub>  |                  | V <sub>A</sub>  |    |  |   |
|     |                                              |              | I <sub>A1</sub> | I <sub>A2</sub> | I <sub>B1</sub> | II <sub>A1</sub> | II <sub>A2</sub> | II <sub>A3</sub> | II <sub>B1</sub> | II <sub>B2</sub> | III <sub>A1</sub> | III <sub>A2</sub> | III <sub>A3</sub> | III <sub>A4</sub> | III <sub>B1</sub> | III <sub>B2</sub> | III <sub>B3</sub> | III <sub>B4</sub> | III <sub>B5</sub> | III <sub>B6</sub> | III <sub>B7</sub> | IV <sub>A1</sub> | IV <sub>A2</sub> | V <sub>A1</sub> |    |  |   |
| 80  | <i>Papilio slateri</i> Hewitson, 1859        | Papilionidae | 1               | 0               | 1               | 0                | 0                | 0                | 0                | 1                | 0                 | 0                 | 0                 | 0                 | 0                 | 0                 | 0                 | 0                 | 0                 | 0                 | 0                 | 0                | 0                | 0               |    |  |   |
| 81  | <i>Papilio elwesi</i> Leech, 1889            | Papilionidae | 0               | 0               | 0               | 0                | 0                | 0                | 0                | 0                | 0                 | 0                 | 0                 | 0                 | 0                 | 0                 | 0                 | 0                 | 0                 | 0                 | 0                 | 1                | 0                | 0               |    |  |   |
| 82  | <i>Delias pasithoe</i> (Linnaeus, 1767)      | Pieridae     | 1               | 1               | 1               | 1                | 1                | 1                | 1                | 1                | 0                 | 0                 | 0                 | 0                 | 0                 | 0                 | 0                 | 0                 | 0                 | 0                 | 0                 | 0                | 0                | 0               |    |  |   |
| 83  | <i>Delias acalis</i> (Godart, 1819)          | Pieridae     | 1               | 1               | 1               | 1                | 1                | 1                | 1                | 1                | 0                 | 0                 | 0                 | 0                 | 0                 | 0                 | 0                 | 0                 | 0                 | 0                 | 0                 | 0                | 0                | 0               |    |  |   |
| 84  | <i>Delias hyparete</i> (Linnaeus, 1758)      | Pieridae     | 1               | 1               | 1               | 1                | 1                | 1                | 1                | 1                | 0                 | 0                 | 0                 | 0                 | 0                 | 0                 | 0                 | 0                 | 0                 | 0                 | 0                 | 0                | 0                | 0               |    |  |   |
| 85  | <i>Delias agostina</i> (Hewitson, 1852)      | Pieridae     | 1               | 1               | 1               | 1                | 1                | 1                | 0                | 0                | 0                 | 0                 | 0                 | 0                 | 0                 | 0                 | 0                 | 0                 | 0                 | 0                 | 0                 | 0                | 0                | 0               |    |  |   |
| 86  | <i>Delias descombesi</i> (Boisduval, 1836)   | Pieridae     | 1               | 1               | 0               | 0                | 0                | 0                | 0                | 0                | 0                 | 0                 | 0                 | 0                 | 0                 | 0                 | 0                 | 0                 | 0                 | 0                 | 0                 | 0                | 0                | 0               |    |  |   |
| 87  | <i>Delias patrua</i> Leech, 1890             | Pieridae     | 0               | 0               | 0               | 0                | 0                | 0                | 0                | 0                | 0                 | 0                 | 1                 | 1                 | 0                 | 0                 | 0                 | 0                 | 0                 | 1                 | 0                 | 0                | 0                | 1               |    |  |   |
| 88  | <i>Delias lativitta</i> Leech, 1893          | Pieridae     | 1               | 1               | 0               | 0                | 1                | 1                | 0                | 0                | 1                 | 1                 | 1                 | 1                 | 0                 | 0                 | 0                 | 0                 | 0                 | 0                 | 0                 | 0                | 0                | 0               |    |  |   |
| 89  | <i>Delias subnubila</i> Leech, 1893          | Pieridae     | 0               | 0               | 0               | 0                | 0                | 0                | 0                | 0                | 0                 | 0                 | 1                 | 1                 | 0                 | 0                 | 0                 | 0                 | 0                 | 1                 | 1                 | 0                | 0                | 1               |    |  |   |
| 90  | <i>Delias sanaca</i> (Moore, 1858)           | Pieridae     | 0               | 0               | 0               | 0                | 1                | 1                | 0                | 0                | 1                 | 1                 | 1                 | 1                 | 1                 | 1                 | 0                 | 0                 | 0                 | 1                 | 1                 | 0                | 0                | 0               |    |  |   |
| 91  | <i>Delias berinda</i> (Moore, 1872)          | Pieridae     | 1               | 1               | 0               | 0                | 0                | 0                | 0                | 0                | 0                 | 0                 | 0                 | 0                 | 0                 | 0                 | 0                 | 0                 | 0                 | 0                 | 1                 | 1                | 0                | 0               |    |  |   |
| 92  | <i>Delias belladonna</i> (Fabricius, 1793)   | Pieridae     | 1               | 1               | 1               | 1                | 1                | 1                | 1                | 1                | 1                 | 1                 | 1                 | 1                 | 1                 | 1                 | 1                 | 1                 | 0                 | 0                 | 1                 | 1                | 0                | 0               |    |  |   |
| 93  | <i>Aporia bieti</i> (Oberthür, 1884)         | Pieridae     | 0               | 0               | 0               | 0                | 0                | 0                | 0                | 0                | 0                 | 0                 | 1                 | 1                 | 0                 | 0                 | 0                 | 0                 | 0                 | 1                 | 1                 | 1                | 1                | 1               |    |  |   |
| 94  | <i>Aporia martineti</i> (Oberthür, 1884)     | Pieridae     | 0               | 0               | 0               | 0                | 0                | 0                | 0                | 0                | 0                 | 0                 | 0                 | 0                 | 0                 | 0                 | 0                 | 0                 | 0                 | 1                 | 1                 | 0                | 0                | 1               |    |  |   |
| 95  | <i>Aporia genestieri</i> (Oberthür, 1902)    | Pieridae     | 0               | 0               | 0               | 0                | 0                | 0                | 0                | 0                | 0                 | 0                 | 1                 | 1                 | 0                 | 0                 | 0                 | 0                 | 0                 | 1                 | 1                 | 1                | 1                | 1               |    |  |   |
| 96  | <i>Aporia procris</i> Leech, 1890            | Pieridae     | 0               | 0               | 0               | 0                | 0                | 0                | 0                | 0                | 0                 | 0                 | 0                 | 0                 | 0                 | 0                 | 0                 | 0                 | 0                 | 1                 | 1                 | 0                | 0                | 1               |    |  |   |
| 97  | <i>Aporia uedai</i> Koiwaya, 1989            | Pieridae     | 0               | 0               | 0               | 0                | 0                | 0                | 0                | 0                | 0                 | 0                 | 0                 | 0                 | 0                 | 0                 | 0                 | 0                 | 0                 | 1                 | 1                 | 0                | 0                | 1               |    |  |   |
| 98  | <i>Aporia lhamo</i> (Oberthür, 1893)         | Pieridae     | 0               | 0               | 0               | 0                | 0                | 0                | 0                | 0                | 0                 | 0                 | 0                 | 0                 | 0                 | 0                 | 0                 | 0                 | 0                 | 1                 | 1                 | 0                | 0                | 1               |    |  |   |
| 99  | <i>Aporia goutellei</i> (Oberthür, 1886)     | Pieridae     | 0               | 0               | 0               | 0                | 0                | 0                | 0                | 0                | 0                 | 0                 | 0                 | 0                 | 0                 | 0                 | 0                 | 0                 | 0                 | 1                 | 1                 | 0                | 0                | 1               |    |  |   |
| 100 | <i>Aporia bernardi</i> Koiwaya, 1989         | Pieridae     | 0               | 0               | 0               | 0                | 0                | 0                | 0                | 0                | 0                 | 0                 | 0                 | 0                 | 0                 | 0                 | 0                 | 0                 | 0                 | 1                 | 1                 | 0                | 0                | 1               |    |  |   |
| 101 | <i>Aporia kamei</i> Koiwaya, 1989            | Pieridae     | 0               | 0               | 0               | 0                | 0                | 0                | 0                | 0                | 0                 | 0                 | 0                 | 0                 | 0                 | 0                 | 0                 | 0                 | 0                 | 1                 | 1                 | 0                | 0                | 1               |    |  |   |
| 102 | <i>Aporia delavayi</i> (Oberthür, 1890)      | Pieridae     | 0               | 0               | 0               | 0                | 0                | 0                | 0                | 0                | 0                 | 0                 | 0                 | 0                 | 0                 | 0                 | 0                 | 0                 | 0                 | 1                 | 1                 | 0                | 0                | 1               |    |  |   |
| 103 | <i>Aporia largeteau</i> i (Oberthür, 1881)   | Pieridae     | 0               | 0               | 0               | 0                | 0                | 0                | 0                | 0                | 0                 | 0                 | 0                 | 0                 | 0                 | 0                 | 1                 | 1                 | 1                 | 0                 | 0                 | 1                | 1                | 0               |    |  |   |
| 104 | <i>Aporia gigantea</i> Koiwaya, 1993         | Pieridae     | 0               | 0               | 0               | 0                | 0                | 0                | 0                | 0                | 0                 | 0                 | 0                 | 0                 | 0                 | 0                 | 1                 | 1                 | 1                 | 0                 | 0                 | 1                | 1                | 0               |    |  |   |
| 105 | <i>Aporia agathon</i> (Gray, 1831)           | Pieridae     | 0               | 0               | 0               | 0                | 0                | 0                | 0                | 0                | 1                 | 1                 | 1                 | 1                 | 1                 | 1                 | 1                 | 1                 | 1                 | 1                 | 1                 | 0                | 0                | 1               |    |  |   |
| 106 | <i>Aporia harrietae</i> (de Nicéville, 1893) | Pieridae     | 0               | 0               | 0               | 0                | 0                | 0                | 0                | 0                | 1                 | 1                 | 1                 | 1                 | 0                 | 0                 | 0                 | 0                 | 0                 | 1                 | 1                 | 0                | 0                | 0               |    |  |   |
| 107 | <i>Aporia hastata</i> (Oberthür, 1892)       | Pieridae     | 0               | 0               | 0               | 0                | 0                | 0                | 0                | 0                | 1                 | 0                 | 1                 | 0                 | 0                 | 0                 | 0                 | 0                 | 0                 | 1                 | 0                 | 0                | 0                | 1               |    |  |   |
| 108 | <i>Aporia nishimurai</i> Koiwaya, 1989       | Pieridae     | 0               | 0               | 0               | 0                | 0                | 0                | 0                | 0                | 0                 | 0                 | 0                 | 0                 | 0                 | 0                 | 0                 | 0                 | 0                 | 1                 | 1                 | 0                | 0                | 1               |    |  |   |
| 109 | <i>Aporia acraea</i> (Oberthür, 1885)        | Pieridae     | 0               | 0               | 0               | 0                | 0                | 0                | 0                | 0                | 0                 | 0                 | 1                 | 1                 | 0                 | 0                 | 0                 | 0                 | 0                 | 1                 | 1                 | 0                | 0                | 1               |    |  |   |
| 110 | <i>Aporia wolongensis</i> Yoshino, 1995      | Pieridae     | 0               | 0               | 0               | 0                | 0                | 0                | 0                | 0                | 0                 | 0                 | 0                 | 0                 | 0                 | 0                 | 0                 | 0                 | 0                 | 1                 | 1                 | 0                | 0                | 1               |    |  |   |
| 111 | <i>Aporia monbeigi</i> (Oberthür, 1917)      | Pieridae     | 0               | 0               | 0               | 0                | 0                | 0                | 0                | 0                | 0                 | 0                 | 0                 | 0                 | 0                 | 0                 | 0                 | 0                 | 0                 | 1                 | 1                 | 0                | 0                | 1               |    |  |   |
| 112 | <i>Aporia larraldei</i> (Oberthür, 1876)     | Pieridae     | 0               | 0               | 0               | 0                | 0                | 0                | 0                | 0                | 0                 | 0                 | 1                 | 1                 | 0                 | 1                 | 1                 | 1                 | 0                 | 1                 | 1                 | 0                | 0                | 1               |    |  |   |
| 113 | <i>Pieris brassicae</i> (Linnaeus, 1758)     | Pieridae     | 1               | 1               | 1               | 1                | 1                | 1                | 1                | 1                | 1                 | 1                 | 1                 | 1                 | 1                 | 1                 | 1                 | 1                 | 1                 | 1                 | 1                 | 1                | 1                | 1               |    |  |   |
| 114 | <i>Pieris rapae</i> (Linnaeus, 1758)         | Pieridae     | 1               | 1               | 1               | 1                | 1                | 1                | 1                | 1                | 1                 | 1                 | 1                 | 1                 | 1                 | 1                 | 1                 | 1                 | 1                 | 1                 | 1                 | 1                | 1                | 1               |    |  |   |
| 115 | <i>Pieris canidia</i> (Sparman, 1768)        | Pieridae     | 1               | 1               | 1               | 1                | 1                | 1                | 1                | 1                | 1                 | 1                 | 1                 | 1                 | 1                 | 1                 | 1                 | 1                 | 1                 | 0                 | 0                 | 1                | 1                | 0               |    |  |   |
| 116 | <i>Pieris steinigeri</i> Eitschberger, 1983  | Pieridae     | 0               | 0               | 0               | 0                | 0                | 0                | 0                | 0                | 0                 | 0                 | 0                 | 0                 | 0                 | 0                 | 0                 | 0                 | 0                 | 1                 | 1                 | 0                | 0                | 1               |    |  |   |
| 117 | <i>Pieris melete</i> Ménétrières, 1857       | Pieridae     | 1               | 1               | 1               | 1                | 1                | 1                | 1                | 1                | 1                 | 1                 | 1                 | 1                 | 1                 | 1                 | 1                 | 1                 | 0                 | 0                 | 1                 | 1                | 0                | 0               |    |  |   |
| 118 | <i>Pieris melaina</i> Röber, 1907            | Pieridae     | 0               | 0               | 0               | 0                | 0                | 0                | 0                | 0                | 0                 | 0                 | 0                 | 0                 | 0                 | 0                 | 0                 | 0                 | 0                 | 1                 | 1                 | 0                | 0                | 1               |    |  |   |
| 119 | <i>Pieris dubernardi</i> Oberthür, 1884      | Pieridae     | 0               | 0               | 0               | 0                | 0                | 0                | 0                | 0                | 0                 | 0                 | 0                 | 0                 | 0                 | 0                 | 0                 | 0                 | 0                 | 1                 | 1                 | 0                | 0                | 1               |    |  |   |

| No. | Pollinating butterfly species                  | Family   | I               |                 |                 | II               |                  |                  |                  |                  | III               |                   |                   |                   |                   |                   |                   |                   |                   |                   |                   |                  |                  | IV              |  | V |
|-----|------------------------------------------------|----------|-----------------|-----------------|-----------------|------------------|------------------|------------------|------------------|------------------|-------------------|-------------------|-------------------|-------------------|-------------------|-------------------|-------------------|-------------------|-------------------|-------------------|-------------------|------------------|------------------|-----------------|--|---|
|     |                                                |          | I <sub>A</sub>  |                 | I <sub>B</sub>  | II <sub>A</sub>  |                  |                  | II <sub>B</sub>  |                  | III <sub>A</sub>  |                   |                   |                   | III <sub>B</sub>  |                   |                   |                   |                   |                   |                   | IV <sub>A</sub>  |                  | V <sub>A</sub>  |  |   |
|     |                                                |          | I <sub>A1</sub> | I <sub>A2</sub> | I <sub>B1</sub> | II <sub>A1</sub> | II <sub>A2</sub> | II <sub>A3</sub> | II <sub>B1</sub> | II <sub>B2</sub> | III <sub>A1</sub> | III <sub>A2</sub> | III <sub>A3</sub> | III <sub>A4</sub> | III <sub>B1</sub> | III <sub>B2</sub> | III <sub>B3</sub> | III <sub>B4</sub> | III <sub>B5</sub> | III <sub>B6</sub> | III <sub>B7</sub> | IV <sub>A1</sub> | IV <sub>A2</sub> | V <sub>A1</sub> |  |   |
| 120 | <i>Pieris wangi</i> Huang, 1998                | Pieridae | 0               | 0               | 0               | 0                | 0                | 0                | 0                | 0                | 0                 | 0                 | 0                 | 0                 | 0                 | 0                 | 0                 | 0                 | 1                 | 1                 | 0                 | 0                | 1                |                 |  |   |
| 121 | <i>Pieris davidis</i> Oberthür, 1876           | Pieridae | 0               | 0               | 0               | 0                | 0                | 0                | 0                | 0                | 0                 | 0                 | 0                 | 0                 | 0                 | 0                 | 0                 | 0                 | 1                 | 1                 | 0                 | 0                | 1                |                 |  |   |
| 122 | <i>Pieris venata</i> Leech, 1891               | Pieridae | 0               | 0               | 0               | 0                | 0                | 0                | 0                | 0                | 0                 | 0                 | 0                 | 0                 | 0                 | 0                 | 0                 | 0                 | 1                 | 1                 | 0                 | 0                | 1                |                 |  |   |
| 123 | <i>Pieris stotzneri</i> (Draeseke, 1924)       | Pieridae | 0               | 0               | 0               | 0                | 0                | 0                | 0                | 0                | 0                 | 0                 | 0                 | 0                 | 0                 | 0                 | 0                 | 0                 | 1                 | 1                 | 0                 | 0                | 1                |                 |  |   |
| 124 | <i>Pontia edusa</i> (Fabricius, 1777)          | Pieridae | 1               | 1               | 1               | 1                | 1                | 1                | 1                | 1                | 1                 | 1                 | 1                 | 1                 | 1                 | 1                 | 1                 | 1                 | 1                 | 1                 | 1                 | 1                | 1                |                 |  |   |
| 125 | <i>Talbotia naganum</i> (Moore, 1884)          | Pieridae | 1               | 1               | 1               | 1                | 1                | 1                | 1                | 1                | 0                 | 0                 | 0                 | 0                 | 0                 | 0                 | 0                 | 0                 | 0                 | 0                 | 0                 | 0                | 0                |                 |  |   |
| 126 | <i>Cepora nerissa</i> (Fabricius, 1775)        | Pieridae | 1               | 1               | 1               | 1                | 1                | 1                | 1                | 1                | 0                 | 0                 | 0                 | 0                 | 0                 | 0                 | 0                 | 0                 | 0                 | 0                 | 0                 | 0                | 0                |                 |  |   |
| 127 | <i>Cepora nadina</i> (Lucas, 1852)             | Pieridae | 1               | 1               | 1               | 1                | 1                | 1                | 1                | 1                | 0                 | 0                 | 0                 | 0                 | 1                 | 1                 | 1                 | 0                 | 1                 | 0                 | 0                 | 0                | 0                |                 |  |   |
| 128 | <i>Appias libythea</i> (Fabricius, 1775)       | Pieridae | 1               | 1               | 1               | 1                | 1                | 1                | 1                | 1                | 0                 | 0                 | 0                 | 0                 | 0                 | 0                 | 0                 | 0                 | 0                 | 0                 | 0                 | 0                | 0                |                 |  |   |
| 129 | <i>Appias albina</i> (Boisduval, 1836)         | Pieridae | 1               | 1               | 1               | 1                | 1                | 1                | 1                | 1                | 0                 | 0                 | 0                 | 0                 | 1                 | 1                 | 1                 | 0                 | 1                 | 0                 | 0                 | 0                | 0                |                 |  |   |
| 130 | <i>Appias indra</i> (Moore, 1857)              | Pieridae | 1               | 1               | 0               | 0                | 0                | 0                | 0                | 0                | 0                 | 0                 | 0                 | 0                 | 0                 | 0                 | 0                 | 0                 | 0                 | 0                 | 0                 | 0                | 0                |                 |  |   |
| 131 | <i>Appias lalage</i> (Doubleday, 1842)         | Pieridae | 1               | 1               | 0               | 0                | 0                | 0                | 0                | 0                | 0                 | 0                 | 0                 | 0                 | 0                 | 0                 | 0                 | 0                 | 0                 | 0                 | 0                 | 0                | 0                |                 |  |   |
| 132 | <i>Appias pandione</i> (Geyer, 1832)           | Pieridae | 1               | 1               | 1               | 1                | 1                | 1                | 1                | 1                | 0                 | 0                 | 0                 | 0                 | 0                 | 0                 | 0                 | 0                 | 0                 | 0                 | 0                 | 0                | 0                |                 |  |   |
| 133 | <i>Appias lalassis</i> Grose-Smith, 1887       | Pieridae | 1               | 1               | 0               | 0                | 1                | 1                | 0                | 0                | 0                 | 0                 | 0                 | 1                 | 0                 | 0                 | 0                 | 0                 | 0                 | 0                 | 0                 | 0                | 0                |                 |  |   |
| 134 | <i>Appias galba</i> (Wallace, 1867)            | Pieridae | 1               | 1               | 1               | 0                | 0                | 0                | 0                | 0                | 0                 | 0                 | 0                 | 0                 | 0                 | 0                 | 0                 | 0                 | 0                 | 0                 | 0                 | 0                | 0                |                 |  |   |
| 135 | <i>Appias lyncida</i> (Cramer, 1779)           | Pieridae | 1               | 1               | 1               | 0                | 0                | 0                | 0                | 0                | 0                 | 0                 | 0                 | 0                 | 0                 | 0                 | 0                 | 0                 | 0                 | 0                 | 0                 | 0                | 0                |                 |  |   |
| 136 | <i>Prioneris philonome</i> (Boisduval, 1836)   | Pieridae | 1               | 1               | 0               | 0                | 0                | 0                | 0                | 0                | 0                 | 0                 | 0                 | 0                 | 0                 | 0                 | 0                 | 0                 | 0                 | 0                 | 0                 | 0                | 0                |                 |  |   |
| 137 | <i>Prioneris thestylis</i> (Doubleday, 1842)   | Pieridae | 1               | 1               | 1               | 1                | 1                | 1                | 1                | 1                | 0                 | 0                 | 0                 | 0                 | 1                 | 1                 | 1                 | 0                 | 1                 | 0                 | 0                 | 0                | 0                |                 |  |   |
| 138 | <i>Ixias pyrene</i> (Linnaeus, 1764)           | Pieridae | 1               | 1               | 1               | 1                | 1                | 1                | 1                | 1                | 1                 | 1                 | 1                 | 1                 | 1                 | 1                 | 1                 | 1                 | 0                 | 0                 | 1                 | 1                | 0                |                 |  |   |
| 139 | <i>Leptosia nina</i> (Fabricius, 1793)         | Pieridae | 1               | 1               | 1               | 0                | 0                | 0                | 0                | 0                | 0                 | 0                 | 0                 | 0                 | 0                 | 0                 | 0                 | 0                 | 0                 | 0                 | 0                 | 0                | 0                |                 |  |   |
| 140 | <i>Hebomoia glaucippe</i> (Linnaeus, 1758)     | Pieridae | 1               | 1               | 1               | 1                | 1                | 1                | 1                | 1                | 1                 | 1                 | 0                 | 1                 | 1                 | 1                 | 1                 | 0                 | 1                 | 0                 | 0                 | 1                | 0                |                 |  |   |
| 141 | <i>Pareronia avatar</i> (Moore, [1858])        | Pieridae | 1               | 1               | 0               | 0                | 0                | 0                | 0                | 0                | 0                 | 0                 | 0                 | 0                 | 0                 | 0                 | 0                 | 0                 | 0                 | 0                 | 0                 | 0                | 0                |                 |  |   |
| 142 | <i>Anthocharis bieti</i> Oberthür, 1884        | Pieridae | 0               | 0               | 0               | 0                | 0                | 0                | 0                | 0                | 0                 | 0                 | 0                 | 0                 | 0                 | 0                 | 0                 | 0                 | 1                 | 1                 | 0                 | 0                | 1                |                 |  |   |
| 143 | <i>Leptidea yunmana</i> Koiwaya, 1996          | Pieridae | 0               | 0               | 0               | 0                | 0                | 0                | 0                | 0                | 0                 | 0                 | 0                 | 0                 | 0                 | 0                 | 0                 | 0                 | 1                 | 0                 | 0                 | 0                | 0                |                 |  |   |
| 144 | <i>Dercas verhuelli</i> (van der Hoeven, 1839) | Pieridae | 1               | 1               | 1               | 1                | 1                | 1                | 0                | 0                | 0                 | 0                 | 0                 | 0                 | 0                 | 0                 | 0                 | 0                 | 0                 | 0                 | 0                 | 0                | 0                |                 |  |   |
| 145 | <i>Dercas lycorias</i> (Doubleday, 1842)       | Pieridae | 1               | 1               | 1               | 1                | 1                | 1                | 1                | 1                | 1                 | 1                 | 1                 | 1                 | 1                 | 1                 | 1                 | 0                 | 1                 | 0                 | 0                 | 0                | 0                |                 |  |   |
| 146 | <i>Gonepteryx aspasia</i> Ménétriers, 1859     | Pieridae | 0               | 0               | 0               | 0                | 0                | 0                | 0                | 0                | 0                 | 0                 | 0                 | 0                 | 0                 | 0                 | 0                 | 0                 | 1                 | 1                 | 0                 | 0                | 1                |                 |  |   |
| 147 | <i>Gonepteryx chinensis</i> Verity, 1909       | Pieridae | 0               | 0               | 0               | 0                | 0                | 0                | 0                | 0                | 0                 | 1                 | 1                 | 1                 | 1                 | 1                 | 1                 | 1                 | 0                 | 1                 | 1                 | 0                | 0                |                 |  |   |
| 148 | <i>Gonepteryx amintha</i> Blanchard, 1871      | Pieridae | 1               | 1               | 1               | 1                | 1                | 1                | 1                | 1                | 1                 | 1                 | 1                 | 1                 | 1                 | 1                 | 1                 | 0                 | 1                 | 0                 | 0                 | 1                | 0                |                 |  |   |
| 149 | <i>Catopsilia pomona</i> (Fabricius, 1775)     | Pieridae | 1               | 1               | 1               | 1                | 1                | 1                | 1                | 1                | 1                 | 1                 | 1                 | 1                 | 1                 | 1                 | 1                 | 0                 | 1                 | 0                 | 0                 | 1                | 0                |                 |  |   |
| 150 | <i>Catopsilia pyranthe</i> (Linnaeus, 1758)    | Pieridae | 1               | 1               | 1               | 1                | 1                | 1                | 1                | 1                | 0                 | 0                 | 0                 | 0                 | 0                 | 0                 | 0                 | 0                 | 0                 | 0                 | 0                 | 0                | 0                |                 |  |   |
| 151 | <i>Colias poliographus</i> Motschulsky, 1860   | Pieridae | 1               | 1               | 1               | 1                | 1                | 1                | 1                | 1                | 1                 | 1                 | 1                 | 1                 | 1                 | 1                 | 1                 | 1                 | 1                 | 1                 | 1                 | 1                | 1                |                 |  |   |
| 152 | <i>Colias fieldii</i> Ménétriers, 1855         | Pieridae | 1               | 1               | 1               | 1                | 1                | 1                | 1                | 1                | 1                 | 1                 | 1                 | 1                 | 1                 | 1                 | 1                 | 1                 | 1                 | 1                 | 1                 | 1                | 1                |                 |  |   |
| 153 | <i>Eurema laeta</i> (Boisduval, 1836)          | Pieridae | 1               | 1               | 1               | 1                | 1                | 1                | 1                | 1                | 1                 | 1                 | 1                 | 1                 | 1                 | 1                 | 1                 | 1                 | 1                 | 1                 | 1                 | 1                | 0                |                 |  |   |
| 154 | <i>Eurema brigitta</i> (Stoll, [1780])         | Pieridae | 1               | 1               | 1               | 1                | 1                | 1                | 1                | 1                | 1                 | 1                 | 1                 | 1                 | 1                 | 1                 | 1                 | 1                 | 1                 | 1                 | 1                 | 1                | 0                |                 |  |   |
| 155 | <i>Eurema hecabe</i> (Linnaeus, 1758)          | Pieridae | 1               | 1               | 1               | 1                | 1                | 1                | 1                | 1                | 1                 | 1                 | 1                 | 1                 | 1                 | 1                 | 1                 | 0                 | 0                 | 0                 | 1                 | 1                | 0                |                 |  |   |
| 156 | <i>Eurema blanda</i> (Boisduval, 1836)         | Pieridae | 1               | 1               | 1               | 1                | 1                | 1                | 1                | 0                | 0                 | 0                 | 0                 | 0                 | 0                 | 0                 | 0                 | 0                 | 0                 | 0                 | 0                 | 0                | 0                |                 |  |   |
| 157 | <i>Eurema andersoni</i> (Moore, 1886)          | Pieridae | 1               | 1               | 1               | 1                | 1                | 1                | 1                | 0                | 0                 | 0                 | 0                 | 0                 | 0                 | 0                 | 0                 | 0                 | 0                 | 0                 | 0                 | 0                | 0                |                 |  |   |
| 158 | <i>Eurema ada</i> (Distant & Pryer, 1887)      | Pieridae | 1               | 1               | 1               | 1                | 1                | 1                | 0                | 0                | 0                 | 0                 | 0                 | 0                 | 0                 | 0                 | 0                 | 0                 | 0                 | 0                 | 0                 | 0                | 0                |                 |  |   |
| 159 | <i>Gandaca harina</i> (Horsfield, [1829])      | Pieridae | 1               | 1               | 1               | 1                | 1                | 1                | 1                | 0                | 0                 | 0                 | 0                 | 0                 | 0                 | 0                 | 0                 | 0                 | 0                 | 0                 | 0                 | 0                | 0                |                 |  |   |

| No. | Pollinating butterfly species                  | Family      | I               |                 |                 | II               |                  |                  |                  |                  | III               |                   |                   |                   |                   |                   |                   |                   |                   |                   |                   |                  |                  |                 | IV |  | V |
|-----|------------------------------------------------|-------------|-----------------|-----------------|-----------------|------------------|------------------|------------------|------------------|------------------|-------------------|-------------------|-------------------|-------------------|-------------------|-------------------|-------------------|-------------------|-------------------|-------------------|-------------------|------------------|------------------|-----------------|----|--|---|
|     |                                                |             | I <sub>A</sub>  |                 | I <sub>B</sub>  | II <sub>A</sub>  |                  |                  | II <sub>B</sub>  |                  | III <sub>A</sub>  |                   |                   |                   | III <sub>B</sub>  |                   |                   |                   |                   |                   |                   | IV <sub>A</sub>  |                  | V <sub>A</sub>  |    |  |   |
|     |                                                |             | I <sub>A1</sub> | I <sub>A2</sub> | I <sub>B1</sub> | II <sub>A1</sub> | II <sub>A2</sub> | II <sub>A3</sub> | II <sub>B1</sub> | II <sub>B2</sub> | III <sub>A1</sub> | III <sub>A2</sub> | III <sub>A3</sub> | III <sub>A4</sub> | III <sub>B1</sub> | III <sub>B2</sub> | III <sub>B3</sub> | III <sub>B4</sub> | III <sub>B5</sub> | III <sub>B6</sub> | III <sub>B7</sub> | IV <sub>A1</sub> | IV <sub>A2</sub> | V <sub>A1</sub> |    |  |   |
| 160 | <i>Danaus genutia</i> (Cramer, 1779)           | Nymphalidae | 1               | 1               | 1               | 1                | 1                | 1                | 1                | 1                | 1                 | 1                 | 1                 | 1                 | 1                 | 1                 | 1                 | 1                 | 1                 | 1                 | 1                 | 1                | 1                | 0               |    |  |   |
| 161 | <i>Danaus chrysippus</i> (Linnaeus, 1758)      | Nymphalidae | 1               | 1               | 1               | 1                | 1                | 1                | 1                | 1                | 1                 | 1                 | 1                 | 1                 | 1                 | 1                 | 1                 | 1                 | 1                 | 1                 | 1                 | 0                | 0                | 0               |    |  |   |
| 162 | <i>Tirumala limniace</i> (Cramer, 1775)        | Nymphalidae | 1               | 1               | 1               | 1                | 1                | 1                | 1                | 1                | 1                 | 1                 | 1                 | 1                 | 1                 | 1                 | 1                 | 0                 | 1                 | 1                 | 1                 | 0                | 0                | 0               |    |  |   |
| 163 | <i>Tirumala septentrionis</i> (Butler, 1874)   | Nymphalidae | 1               | 1               | 1               | 1                | 1                | 1                | 1                | 1                | 1                 | 1                 | 1                 | 1                 | 1                 | 1                 | 1                 | 1                 | 1                 | 1                 | 1                 | 1                | 1                | 0               |    |  |   |
| 164 | <i>Parantica sita</i> (Kollar, 1844)           | Nymphalidae | 1               | 1               | 1               | 1                | 1                | 1                | 1                | 1                | 1                 | 1                 | 1                 | 1                 | 1                 | 1                 | 1                 | 1                 | 1                 | 1                 | 1                 | 1                | 1                | 1               |    |  |   |
| 165 | <i>Parantica melaneus</i> (Cramer, 1775)       | Nymphalidae | 1               | 1               | 1               | 1                | 1                | 1                | 1                | 1                | 0                 | 0                 | 0                 | 0                 | 0                 | 0                 | 0                 | 0                 | 1                 | 0                 | 0                 | 0                | 0                | 0               |    |  |   |
| 166 | <i>Parantica swinhoei</i> (Moore, 1883)        | Nymphalidae | 1               | 1               | 1               | 1                | 1                | 1                | 1                | 1                | 1                 | 1                 | 1                 | 1                 | 1                 | 1                 | 1                 | 1                 | 1                 | 1                 | 1                 | 1                | 1                | 1               |    |  |   |
| 167 | <i>Parantica aglea</i> (Stoll, 1782)           | Nymphalidae | 1               | 1               | 1               | 1                | 1                | 1                | 1                | 1                | 0                 | 0                 | 0                 | 0                 | 0                 | 0                 | 0                 | 0                 | 0                 | 0                 | 0                 | 0                | 0                | 0               |    |  |   |
| 168 | <i>Ideopsis vulgaris</i> (Butler, 1874)        | Nymphalidae | 0               | 0               | 1               | 0                | 0                | 0                | 1                | 1                | 0                 | 0                 | 0                 | 0                 | 0                 | 0                 | 0                 | 0                 | 0                 | 0                 | 0                 | 0                | 0                | 0               |    |  |   |
| 169 | <i>Euploea midamus</i> Linnaeus, 1758          | Nymphalidae | 1               | 0               | 1               | 1                | 1                | 1                | 0                | 0                | 0                 | 0                 | 0                 | 0                 | 0                 | 0                 | 0                 | 0                 | 0                 | 0                 | 0                 | 0                | 0                | 0               |    |  |   |
| 170 | <i>Euploea core</i> Cramer, 1780               | Nymphalidae | 1               | 1               | 1               | 1                | 1                | 1                | 1                | 1                | 1                 | 1                 | 0                 | 0                 | 1                 | 1                 | 1                 | 0                 | 1                 | 0                 | 0                 | 0                | 0                | 0               |    |  |   |
| 171 | <i>Euploea eunice</i> Godart, 1819             | Nymphalidae | 0               | 0               | 1               | 0                | 0                | 0                | 0                | 1                | 0                 | 0                 | 0                 | 0                 | 0                 | 0                 | 0                 | 0                 | 1                 | 0                 | 0                 | 0                | 0                | 0               |    |  |   |
| 172 | <i>Euploea mulciber</i> Cramer, 1777           | Nymphalidae | 1               | 1               | 1               | 1                | 1                | 1                | 1                | 1                | 1                 | 1                 | 1                 | 1                 | 1                 | 1                 | 1                 | 1                 | 1                 | 1                 | 1                 | 1                | 1                | 0               |    |  |   |
| 173 | <i>Euploea sylvester</i> Fabricius, 1793       | Nymphalidae | 1               | 0               | 1               | 0                | 1                | 0                | 0                | 1                | 0                 | 0                 | 0                 | 0                 | 0                 | 0                 | 0                 | 0                 | 1                 | 0                 | 0                 | 0                | 0                | 0               |    |  |   |
| 174 | <i>Euploea tulliolus</i> Fabricius, 1793       | Nymphalidae | 0               | 0               | 1               | 0                | 0                | 0                | 0                | 1                | 0                 | 0                 | 0                 | 0                 | 0                 | 0                 | 0                 | 0                 | 1                 | 0                 | 0                 | 0                | 0                | 0               |    |  |   |
| 175 | <i>Euploea radamantha</i> Fabricius, 1793      | Nymphalidae | 1               | 0               | 0               | 0                | 0                | 0                | 0                | 0                | 0                 | 0                 | 0                 | 0                 | 0                 | 0                 | 0                 | 0                 | 0                 | 0                 | 0                 | 0                | 0                | 0               |    |  |   |
| 176 | <i>Euploea klugii</i> Moore, 1858              | Nymphalidae | 1               | 0               | 0               | 0                | 1                | 0                | 0                | 0                | 0                 | 0                 | 0                 | 0                 | 0                 | 0                 | 0                 | 0                 | 0                 | 0                 | 0                 | 0                | 0                | 0               |    |  |   |
| 177 | <i>Euploea algea</i> Godart, 1819              | Nymphalidae | 1               | 0               | 1               | 0                | 0                | 0                | 0                | 0                | 0                 | 0                 | 0                 | 0                 | 0                 | 0                 | 0                 | 0                 | 0                 | 0                 | 0                 | 0                | 0                | 0               |    |  |   |
| 178 | <i>Acraea issoria</i> (Hübner, [1819])         | Nymphalidae | 1               | 1               | 1               | 1                | 1                | 1                | 1                | 1                | 1                 | 1                 | 1                 | 1                 | 1                 | 1                 | 1                 | 1                 | 1                 | 1                 | 1                 | 1                | 1                | 1               |    |  |   |
| 179 | <i>Acraea terpsicore</i> (Linnaeus, 1758)      | Nymphalidae | 1               | 1               | 0               | 0                | 0                | 1                | 0                | 0                | 0                 | 0                 | 0                 | 0                 | 0                 | 0                 | 0                 | 0                 | 0                 | 0                 | 0                 | 0                | 0                | 0               |    |  |   |
| 180 | <i>Cethosia biblis</i> (Drury, 1770)           | Nymphalidae | 1               | 1               | 1               | 1                | 1                | 1                | 1                | 1                | 1                 | 1                 | 1                 | 1                 | 1                 | 1                 | 1                 | 1                 | 1                 | 1                 | 1                 | 1                | 1                | 0               |    |  |   |
| 181 | <i>Cethosia cyane</i> (Drury, 1770)            | Nymphalidae | 1               | 1               | 1               | 1                | 1                | 1                | 1                | 1                | 1                 | 1                 | 0                 | 0                 | 0                 | 0                 | 0                 | 0                 | 1                 | 1                 | 1                 | 0                | 0                | 0               |    |  |   |
| 182 | <i>Vindula erota</i> (Fabricius, 1793)         | Nymphalidae | 1               | 1               | 1               | 1                | 1                | 1                | 1                | 1                | 0                 | 0                 | 0                 | 0                 | 0                 | 0                 | 0                 | 0                 | 1                 | 0                 | 0                 | 0                | 0                | 0               |    |  |   |
| 183 | <i>Vagrans egista</i> (Cramer, 1780)           | Nymphalidae | 1               | 1               | 1               | 1                | 1                | 1                | 1                | 1                | 0                 | 1                 | 0                 | 1                 | 0                 | 0                 | 0                 | 0                 | 1                 | 0                 | 0                 | 0                | 0                | 0               |    |  |   |
| 184 | <i>Cupha erymanthis</i> (Drury, [1773])        | Nymphalidae | 1               | 1               | 1               | 1                | 1                | 1                | 1                | 1                | 1                 | 1                 | 0                 | 0                 | 0                 | 0                 | 0                 | 1                 | 0                 | 0                 | 0                 | 0                | 0                | 0               |    |  |   |
| 185 | <i>Phalanta phalantha</i> (Drury, 1773)        | Nymphalidae | 1               | 1               | 1               | 1                | 1                | 1                | 1                | 1                | 1                 | 1                 | 0                 | 1                 | 1                 | 1                 | 0                 | 1                 | 0                 | 0                 | 0                 | 0                | 0                | 0               |    |  |   |
| 186 | <i>Phalanta alcippe</i> (Stoll, [1782])        | Nymphalidae | 1               | 0               | 1               | 0                | 1                | 0                | 0                | 0                | 0                 | 0                 | 0                 | 0                 | 0                 | 0                 | 0                 | 0                 | 0                 | 0                 | 0                 | 0                | 0                | 0               |    |  |   |
| 187 | <i>Cirrochroa tyche</i> C. & R. Felder, 1861   | Nymphalidae | 1               | 1               | 1               | 1                | 1                | 1                | 1                | 1                | 1                 | 1                 | 1                 | 1                 | 1                 | 0                 | 0                 | 0                 | 1                 | 0                 | 0                 | 0                | 0                | 0               |    |  |   |
| 188 | <i>Cirrochroa aoris</i> Doubleday, [1847]      | Nymphalidae | 0               | 1               | 1               | 0                | 0                | 1                | 0                | 0                | 0                 | 1                 | 0                 | 0                 | 0                 | 0                 | 0                 | 0                 | 0                 | 0                 | 0                 | 0                | 0                | 0               |    |  |   |
| 189 | <i>Argynnis paphia</i> (Linnaeus, 1758)        | Nymphalidae | 0               | 0               | 0               | 0                | 0                | 0                | 0                | 0                | 0                 | 0                 | 0                 | 0                 | 0                 | 1                 | 1                 | 1                 | 0                 | 1                 | 1                 | 1                | 1                | 1               |    |  |   |
| 190 | <i>Argynnis hyperbius</i> (Linnaeus, 1763)     | Nymphalidae | 1               | 1               | 1               | 1                | 1                | 1                | 1                | 1                | 1                 | 1                 | 1                 | 1                 | 1                 | 1                 | 1                 | 1                 | 1                 | 1                 | 1                 | 1                | 1                | 1               |    |  |   |
| 191 | <i>Argynnis laodice</i> (Pallas, 1771)         | Nymphalidae | 0               | 0               | 0               | 0                | 0                | 0                | 0                | 0                | 1                 | 1                 | 1                 | 1                 | 1                 | 1                 | 1                 | 1                 | 0                 | 1                 | 1                 | 1                | 1                | 1               |    |  |   |
| 192 | <i>Argynnis sagana</i> Doubleday, [1847]       | Nymphalidae | 0               | 0               | 0               | 0                | 0                | 0                | 0                | 0                | 0                 | 0                 | 0                 | 1                 | 0                 | 0                 | 0                 | 0                 | 0                 | 0                 | 1                 | 1                | 1                | 1               |    |  |   |
| 193 | <i>Argynnis childreni</i> Gray, 1831           | Nymphalidae | 1               | 1               | 1               | 1                | 1                | 1                | 1                | 1                | 1                 | 1                 | 1                 | 1                 | 1                 | 1                 | 1                 | 1                 | 1                 | 1                 | 1                 | 1                | 1                | 1               |    |  |   |
| 194 | <i>Argynnis zenobia</i> Leech, 1890            | Nymphalidae | 0               | 0               | 0               | 0                | 0                | 0                | 0                | 0                | 0                 | 0                 | 0                 | 0                 | 0                 | 0                 | 0                 | 0                 | 0                 | 0                 | 1                 | 0                | 1                | 1               |    |  |   |
| 195 | <i>Argynnis aglaja</i> (Linnaeus, 1758)        | Nymphalidae | 0               | 0               | 0               | 0                | 0                | 0                | 0                | 0                | 0                 | 0                 | 0                 | 0                 | 0                 | 0                 | 0                 | 0                 | 1                 | 0                 | 1                 | 1                | 1                | 1               |    |  |   |
| 196 | <i>Argynnis nerippe</i> (C. & R. Felder, 1862) | Nymphalidae | 0               | 0               | 0               | 0                | 0                | 0                | 0                | 0                | 0                 | 0                 | 0                 | 0                 | 0                 | 0                 | 0                 | 0                 | 1                 | 0                 | 1                 | 0                | 1                | 1               |    |  |   |
| 197 | <i>Argynnis adippe</i> (Schiffermüller, 1775)  | Nymphalidae | 0               | 0               | 0               | 0                | 0                | 0                | 0                | 0                | 0                 | 0                 | 1                 | 1                 | 0                 | 0                 | 0                 | 1                 | 0                 | 1                 | 1                 | 1                | 1                | 1               |    |  |   |
| 198 | <i>Clossiana gong</i> (Oberthür, 1884)         | Nymphalidae | 0               | 0               | 0               | 0                | 0                | 0                | 0                | 0                | 0                 | 0                 | 0                 | 0                 | 0                 | 0                 | 1                 | 1                 | 0                 | 1                 | 1                 | 0                | 0                | 1               |    |  |   |
| 199 | <i>Issoria lathonia</i> (Linnaeus, 1758)       | Nymphalidae | 0               | 0               | 0               | 0                | 0                | 0                | 0                | 0                | 0                 | 0                 | 1                 | 1                 | 0                 | 1                 | 1                 | 1                 | 0                 | 1                 | 1                 | 0                | 0                | 1               |    |  |   |

| No. | Pollinating butterfly species                          | Family      | I               |                 |                 | II               |                  |                  |                  |                  | III               |                   |                   |                   |                   |                   |                   |                   |                   |                   |                   |                  |                  |                 | IV              |  | V              |
|-----|--------------------------------------------------------|-------------|-----------------|-----------------|-----------------|------------------|------------------|------------------|------------------|------------------|-------------------|-------------------|-------------------|-------------------|-------------------|-------------------|-------------------|-------------------|-------------------|-------------------|-------------------|------------------|------------------|-----------------|-----------------|--|----------------|
|     |                                                        |             | I <sub>A</sub>  |                 | I <sub>B</sub>  | II <sub>A</sub>  |                  |                  | II <sub>B</sub>  |                  | III <sub>A</sub>  |                   |                   |                   | III <sub>B</sub>  |                   |                   |                   |                   |                   |                   |                  |                  |                 | IV <sub>A</sub> |  | V <sub>A</sub> |
|     |                                                        |             | I <sub>A1</sub> | I <sub>A2</sub> | I <sub>B1</sub> | II <sub>A1</sub> | II <sub>A2</sub> | II <sub>A3</sub> | II <sub>B1</sub> | II <sub>B2</sub> | III <sub>A1</sub> | III <sub>A2</sub> | III <sub>A3</sub> | III <sub>A4</sub> | III <sub>B1</sub> | III <sub>B2</sub> | III <sub>B3</sub> | III <sub>B4</sub> | III <sub>B5</sub> | III <sub>B6</sub> | III <sub>B7</sub> | IV <sub>A1</sub> | IV <sub>A2</sub> | V <sub>A1</sub> |                 |  |                |
| 200 | <i>Issoria eugenia</i> (Eversmann, 1847)               | Nymphalidae | 0               | 0               | 0               | 0                | 0                | 0                | 0                | 0                | 0                 | 0                 | 0                 | 0                 | 0                 | 0                 | 0                 | 0                 | 0                 | 0                 | 0                 | 0                | 0                | 1               |                 |  |                |
| 201 | <i>Hypolimnas missipus</i> (Linnaeus, 1764)            | Nymphalidae | 1               | 1               | 1               | 1                | 1                | 1                | 1                | 1                | 1                 | 1                 | 0                 | 0                 | 1                 | 0                 | 0                 | 0                 | 1                 | 0                 | 0                 | 0                | 0                | 0               |                 |  |                |
| 202 | <i>Hypolimnas bolina</i> (Linnaeus, 1758)              | Nymphalidae | 1               | 1               | 1               | 1                | 1                | 1                | 1                | 1                | 1                 | 1                 | 1                 | 1                 | 1                 | 1                 | 1                 | 1                 | 1                 | 0                 | 1                 | 1                | 0                |                 |                 |  |                |
| 203 | <i>Aglais chinensis</i> (Leech, [1892])                | Nymphalidae | 0               | 0               | 1               | 0                | 0                | 0                | 0                | 1                | 1                 | 1                 | 1                 | 1                 | 1                 | 1                 | 1                 | 1                 | 1                 | 1                 | 1                 | 1                | 1                |                 |                 |  |                |
| 204 | <i>Polygonia c-aureum</i> (Linnaeus, 1758)             | Nymphalidae | 1               | 0               | 1               | 1                | 1                | 1                | 1                | 1                | 0                 | 0                 | 0                 | 0                 | 0                 | 0                 | 0                 | 0                 | 0                 | 1                 | 1                 | 1                | 0                |                 |                 |  |                |
| 205 | <i>Vanessa indica</i> (Herbst, 1794)                   | Nymphalidae | 1               | 1               | 1               | 1                | 1                | 1                | 1                | 1                | 1                 | 1                 | 1                 | 1                 | 1                 | 1                 | 1                 | 1                 | 1                 | 1                 | 1                 | 1                | 1                |                 |                 |  |                |
| 206 | <i>Vanessa cardui</i> (Linnaeus, 1758)                 | Nymphalidae | 1               | 1               | 1               | 1                | 1                | 1                | 1                | 1                | 1                 | 1                 | 1                 | 1                 | 1                 | 1                 | 1                 | 1                 | 1                 | 1                 | 1                 | 1                | 1                |                 |                 |  |                |
| 207 | <i>Junonia almana</i> (Linnaeus, 1758)                 | Nymphalidae | 1               | 1               | 1               | 1                | 1                | 1                | 1                | 1                | 1                 | 1                 | 1                 | 1                 | 1                 | 1                 | 1                 | 1                 | 1                 | 1                 | 1                 | 1                | 0                |                 |                 |  |                |
| 208 | <i>Junonia orithya</i> (Linnaeus, 1758)                | Nymphalidae | 1               | 1               | 1               | 1                | 1                | 1                | 1                | 1                | 1                 | 1                 | 1                 | 1                 | 1                 | 1                 | 1                 | 1                 | 1                 | 1                 | 1                 | 1                | 1                |                 |                 |  |                |
| 209 | <i>Junonia hierta</i> (Fabricius, 1798)                | Nymphalidae | 1               | 1               | 1               | 1                | 1                | 1                | 1                | 1                | 1                 | 1                 | 1                 | 1                 | 1                 | 1                 | 0                 | 1                 | 1                 | 1                 | 0                 | 0                | 0                |                 |                 |  |                |
| 210 | <i>Junonia lemonias</i> (Linnaeus, 1767)               | Nymphalidae | 1               | 1               | 1               | 1                | 1                | 1                | 1                | 1                | 1                 | 1                 | 0                 | 0                 | 0                 | 1                 | 0                 | 0                 | 1                 | 0                 | 0                 | 0                | 0                |                 |                 |  |                |
| 211 | <i>Junonia atlites</i> (Linnaeus, 1763)                | Nymphalidae | 1               | 1               | 1               | 1                | 1                | 1                | 1                | 1                | 1                 | 1                 | 0                 | 0                 | 0                 | 1                 | 0                 | 0                 | 1                 | 0                 | 0                 | 0                | 0                |                 |                 |  |                |
| 212 | <i>Junonia iphita</i> (Cramer, [1779])                 | Nymphalidae | 1               | 1               | 1               | 1                | 1                | 1                | 1                | 1                | 1                 | 1                 | 0                 | 0                 | 1                 | 0                 | 0                 | 0                 | 1                 | 0                 | 0                 | 1                | 0                |                 |                 |  |                |
| 213 | <i>Symbrenthia lilaea</i> (Hewitson, 1864)             | Nymphalidae | 1               | 1               | 1               | 1                | 1                | 1                | 1                | 1                | 1                 | 1                 | 1                 | 1                 | 1                 | 1                 | 1                 | 1                 | 1                 | 1                 | 1                 | 1                | 1                |                 |                 |  |                |
| 214 | <i>Symbrenthia hypselis</i> (Godart, [1824])           | Nymphalidae | 1               | 1               | 1               | 1                | 1                | 1                | 1                | 1                | 0                 | 1                 | 0                 | 0                 | 0                 | 0                 | 0                 | 0                 | 0                 | 0                 | 0                 | 0                | 0                |                 |                 |  |                |
| 215 | <i>Symbrenthia brabira</i> Moore, 1872                 | Nymphalidae | 0               | 0               | 0               | 0                | 0                | 0                | 0                | 0                | 0                 | 0                 | 0                 | 0                 | 0                 | 0                 | 0                 | 0                 | 0                 | 0                 | 1                 | 0                | 0                |                 |                 |  |                |
| 216 | <i>Symbrenthia sinica</i> Moore, 1899                  | Nymphalidae | 0               | 0               | 0               | 0                | 0                | 0                | 0                | 0                | 0                 | 0                 | 0                 | 0                 | 0                 | 0                 | 0                 | 0                 | 0                 | 0                 | 1                 | 0                | 0                |                 |                 |  |                |
| 217 | <i>Symbrenthia niphanda</i> Moore, 1872                | Nymphalidae | 0               | 0               | 0               | 0                | 0                | 0                | 0                | 0                | 0                 | 1                 | 0                 | 1                 | 0                 | 0                 | 0                 | 0                 | 0                 | 0                 | 0                 | 0                | 0                |                 |                 |  |                |
| 218 | <i>Araschnia prorsoides</i> (Blanchard, 1871)          | Nymphalidae | 0               | 0               | 0               | 0                | 0                | 0                | 0                | 0                | 1                 | 1                 | 1                 | 1                 | 1                 | 1                 | 1                 | 1                 | 1                 | 1                 | 1                 | 1                | 1                |                 |                 |  |                |
| 219 | <i>Araschnia doris</i> Leech, [1892]                   | Nymphalidae | 0               | 0               | 0               | 0                | 0                | 0                | 0                | 0                | 0                 | 0                 | 0                 | 0                 | 0                 | 0                 | 0                 | 0                 | 0                 | 0                 | 1                 | 1                | 0                |                 |                 |  |                |
| 220 | <i>Melitaea yuenty</i> Oberthür, 1886                  | Nymphalidae | 0               | 0               | 1               | 0                | 0                | 0                | 0                | 1                | 0                 | 0                 | 1                 | 1                 | 1                 | 1                 | 1                 | 0                 | 1                 | 1                 | 1                 | 0                | 1                |                 |                 |  |                |
| 221 | <i>Melitaea jezebel</i> Oberthür, 1886                 | Nymphalidae | 0               | 0               | 0               | 0                | 0                | 0                | 0                | 0                | 0                 | 0                 | 1                 | 0                 | 0                 | 0                 | 1                 | 0                 | 0                 | 1                 | 0                 | 0                | 1                |                 |                 |  |                |
| 222 | <i>Melitaea agar</i> Oberthür, 1886                    | Nymphalidae | 0               | 0               | 0               | 0                | 0                | 0                | 0                | 0                | 0                 | 0                 | 0                 | 0                 | 0                 | 0                 | 0                 | 0                 | 1                 | 0                 | 0                 | 0                | 1                |                 |                 |  |                |
| 223 | <i>Ariadne ariadne</i> (Linnaeus, 1763)                | Nymphalidae | 1               | 1               | 1               | 1                | 1                | 1                | 1                | 1                | 1                 | 1                 | 0                 | 0                 | 1                 | 1                 | 1                 | 0                 | 1                 | 1                 | 1                 | 0                | 0                |                 |                 |  |                |
| 224 | <i>Ariadne merione</i> (Cramer, [1777])                | Nymphalidae | 1               | 0               | 0               | 1                | 1                | 0                | 0                | 0                | 0                 | 0                 | 0                 | 0                 | 0                 | 0                 | 0                 | 0                 | 0                 | 0                 | 0                 | 0                | 0                |                 |                 |  |                |
| 225 | <i>Neptis sappho</i> (Pallas, 1771)                    | Nymphalidae | 1               | 1               | 1               | 1                | 1                | 1                | 1                | 1                | 1                 | 1                 | 1                 | 1                 | 1                 | 1                 | 1                 | 1                 | 1                 | 1                 | 1                 | 1                | 1                |                 |                 |  |                |
| 226 | <i>Neptis hylas</i> (Linnaeus, 1758)                   | Nymphalidae | 1               | 1               | 1               | 1                | 1                | 1                | 1                | 1                | 1                 | 1                 | 0                 | 1                 | 0                 | 1                 | 1                 | 0                 | 1                 | 0                 | 0                 | 1                | 0                |                 |                 |  |                |
| 227 | <i>Pseudergolis wedah</i> (Kollar, 1848)               | Nymphalidae | 1               | 1               | 1               | 1                | 1                | 1                | 1                | 1                | 1                 | 1                 | 1                 | 1                 | 1                 | 1                 | 1                 | 1                 | 1                 | 1                 | 1                 | 1                | 1                |                 |                 |  |                |
| 228 | <i>Cyrestis thyodamas</i> Boisduval, 1846              | Nymphalidae | 1               | 1               | 1               | 1                | 1                | 1                | 1                | 1                | 1                 | 1                 | 0                 | 1                 | 1                 | 1                 | 0                 | 0                 | 1                 | 0                 | 0                 | 1                | 0                |                 |                 |  |                |
| 229 | <i>Melanargia asiatica</i> (Oberthür & Houlbert, 1922) | Nymphalidae | 0               | 0               | 0               | 0                | 0                | 0                | 0                | 0                | 0                 | 0                 | 1                 | 0                 | 0                 | 0                 | 0                 | 1                 | 0                 | 1                 | 1                 | 0                | 1                |                 |                 |  |                |
| 230 | <i>Melanargia leda</i> Leech, 1891                     | Nymphalidae | 0               | 0               | 0               | 0                | 0                | 0                | 0                | 0                | 0                 | 0                 | 1                 | 0                 | 0                 | 0                 | 0                 | 1                 | 0                 | 1                 | 1                 | 0                | 1                |                 |                 |  |                |
| 231 | <i>Ypthima baldus</i> (Fabricius, 1775)                | Nymphalidae | 1               | 1               | 1               | 1                | 1                | 1                | 1                | 1                | 1                 | 1                 | 1                 | 1                 | 1                 | 1                 | 1                 | 1                 | 1                 | 1                 | 1                 | 1                | 1                |                 |                 |  |                |
| 232 | <i>Ypthima zodia</i> Butler, 1871                      | Nymphalidae | 0               | 0               | 0               | 1                | 0                | 0                | 0                | 0                | 0                 | 0                 | 0                 | 0                 | 1                 | 1                 | 1                 | 1                 | 0                 | 1                 | 0                 | 0                | 0                |                 |                 |  |                |
| 233 | <i>Ypthima sakra</i> Moore, 1857                       | Nymphalidae | 0               | 0               | 1               | 0                | 0                | 1                | 0                | 1                | 1                 | 1                 | 1                 | 1                 | 1                 | 1                 | 1                 | 1                 | 1                 | 1                 | 1                 | 1                | 1                |                 |                 |  |                |
| 234 | <i>Ypthima parasakra</i> Eliot, 1987                   | Nymphalidae | 0               | 0               | 0               | 0                | 0                | 1                | 0                | 0                | 0                 | 1                 | 0                 | 1                 | 0                 | 0                 | 0                 | 0                 | 0                 | 0                 | 0                 | 0                | 0                |                 |                 |  |                |
| 235 | <i>Ypthima kitawakii</i> Uémura & Koiwaya, 2001        | Nymphalidae | 0               | 0               | 0               | 0                | 0                | 0                | 0                | 0                | 0                 | 0                 | 0                 | 0                 | 1                 | 1                 | 1                 | 1                 | 0                 | 1                 | 1                 | 0                | 0                |                 |                 |  |                |
| 236 | <i>Ypthima sinica</i> Uémura & Koiwaya, 2000           | Nymphalidae | 0               | 0               | 0               | 0                | 0                | 0                | 0                | 0                | 0                 | 0                 | 0                 | 0                 | 1                 | 0                 | 1                 | 0                 | 0                 | 0                 | 1                 | 1                | 0                |                 |                 |  |                |
| 237 | <i>Ypthima confusa</i> Shirôzu & Shima, 1977           | Nymphalidae | 0               | 0               | 0               | 1                | 1                | 1                | 0                | 0                | 0                 | 0                 | 0                 | 0                 | 0                 | 0                 | 0                 | 0                 | 0                 | 0                 | 0                 | 0                | 0                |                 |                 |  |                |
| 238 | <i>Ypthima dromon</i> Oberthür, 1891                   | Nymphalidae | 0               | 0               | 0               | 0                | 0                | 0                | 0                | 0                | 0                 | 0                 | 1                 | 1                 | 1                 | 1                 | 1                 | 0                 | 1                 | 1                 | 0                 | 0                | 1                |                 |                 |  |                |
| 239 | <i>Callerebia polyphemus</i> (Oberthür, 1877)          | Nymphalidae | 0               | 0               | 0               | 0                | 0                | 0                | 0                | 0                | 0                 | 0                 | 1                 | 1                 | 1                 | 1                 | 1                 | 0                 | 1                 | 1                 | 1                 | 1                | 1                |                 |                 |  |                |

| No. | Pollinating butterfly species                         | Family     | I               |                 |                 | II               |                  |                  |                  | III              |                   |                   |                   |                   |                   |                   |                   |                   |                   |                   |                   | IV               |                  | V               |
|-----|-------------------------------------------------------|------------|-----------------|-----------------|-----------------|------------------|------------------|------------------|------------------|------------------|-------------------|-------------------|-------------------|-------------------|-------------------|-------------------|-------------------|-------------------|-------------------|-------------------|-------------------|------------------|------------------|-----------------|
|     |                                                       |            | I <sub>A</sub>  |                 | I <sub>B</sub>  | II <sub>A</sub>  |                  |                  | II <sub>B</sub>  |                  | III <sub>A</sub>  |                   |                   |                   | III <sub>B</sub>  |                   |                   |                   |                   |                   |                   | IV <sub>A</sub>  |                  | V <sub>A</sub>  |
|     |                                                       |            | I <sub>A1</sub> | I <sub>A2</sub> | I <sub>B1</sub> | II <sub>A1</sub> | II <sub>A2</sub> | II <sub>A3</sub> | II <sub>B1</sub> | II <sub>B2</sub> | III <sub>A1</sub> | III <sub>A2</sub> | III <sub>A3</sub> | III <sub>A4</sub> | III <sub>B1</sub> | III <sub>B2</sub> | III <sub>B3</sub> | III <sub>B4</sub> | III <sub>B5</sub> | III <sub>B6</sub> | III <sub>B7</sub> | IV <sub>A1</sub> | IV <sub>A2</sub> | V <sub>A1</sub> |
| 240 | <i>Abisara freda</i> Bennet, 1957                     | Lycaenidae | 1               | 1               | 1               | 1                | 1                | 1                | 1                | 1                | 1                 | 1                 | 1                 | 1                 | 1                 | 1                 | 1                 | 0                 | 1                 | 1                 | 1                 | 0                | 0                | 0               |
| 241 | <i>Abisara fylla</i> (Westwood, [1851])               | Lycaenidae | 1               | 1               | 1               | 1                | 1                | 1                | 1                | 1                | 1                 | 1                 | 1                 | 1                 | 0                 | 0                 | 0                 | 0                 | 0                 | 0                 | 0                 | 0                | 0                | 0               |
| 242 | <i>Abisara chelina</i> (Fruhstorfer, 1904)            | Lycaenidae | 1               | 1               | 0               | 0                | 1                | 1                | 1                | 0                | 0                 | 0                 | 0                 | 0                 | 0                 | 0                 | 0                 | 0                 | 0                 | 0                 | 0                 | 0                | 0                | 0               |
| 243 | <i>Zemeros flegyas</i> (Cramer, [1780])               | Lycaenidae | 1               | 1               | 1               | 1                | 1                | 1                | 1                | 1                | 1                 | 1                 | 1                 | 1                 | 1                 | 1                 | 1                 | 1                 | 1                 | 0                 | 0                 | 1                | 1                | 0               |
| 244 | <i>Dodona egeon</i> (Westwood, [1851])                | Lycaenidae | 1               | 1               | 0               | 1                | 1                | 1                | 0                | 0                | 1                 | 1                 | 1                 | 1                 | 0                 | 0                 | 0                 | 0                 | 0                 | 0                 | 0                 | 0                | 0                | 0               |
| 245 | <i>Dodona hoenei</i> Foster, 1951                     | Lycaenidae | 0               | 0               | 0               | 0                | 0                | 0                | 0                | 0                | 0                 | 0                 | 1                 | 1                 | 1                 | 0                 | 0                 | 0                 | 0                 | 1                 | 1                 | 0                | 0                | 1               |
| 246 | <i>Dodona eugenes</i> Bates, [1868]                   | Lycaenidae | 1               | 1               | 1               | 1                | 1                | 1                | 1                | 1                | 1                 | 1                 | 1                 | 1                 | 1                 | 1                 | 1                 | 1                 | 1                 | 1                 | 1                 | 1                | 1                | 1               |
| 247 | <i>Dodona adonira</i> Hewitson, [1865]                | Lycaenidae | 1               | 1               | 0               | 0                | 0                | 1                | 0                | 0                | 1                 | 1                 | 1                 | 1                 | 0                 | 0                 | 0                 | 0                 | 0                 | 0                 | 0                 | 0                | 0                | 0               |
| 248 | <i>Dodona dipoea</i> Hewitson, [1865]                 | Lycaenidae | 0               | 0               | 0               | 0                | 0                | 0                | 0                | 0                | 1                 | 1                 | 1                 | 1                 | 0                 | 0                 | 0                 | 0                 | 0                 | 0                 | 0                 | 0                | 0                | 1               |
| 249 | <i>Dodona durga</i> (Kollar, [1844])                  | Lycaenidae | 0               | 0               | 0               | 0                | 0                | 0                | 0                | 0                | 1                 | 0                 | 1                 | 1                 | 1                 | 1                 | 1                 | 1                 | 1                 | 1                 | 1                 | 1                | 1                | 1               |
| 250 | <i>Dodona ouida</i> Moore, [1865]                     | Lycaenidae | 1               | 1               | 0               | 1                | 1                | 1                | 1                | 1                | 1                 | 1                 | 1                 | 1                 | 1                 | 1                 | 1                 | 1                 | 1                 | 1                 | 1                 | 1                | 1                | 1               |
| 251 | <i>Dodona deodata</i> Hewitson, 1876                  | Lycaenidae | 1               | 1               | 1               | 1                | 1                | 1                | 1                | 1                | 0                 | 0                 | 0                 | 0                 | 0                 | 0                 | 0                 | 0                 | 0                 | 0                 | 0                 | 0                | 0                | 0               |
| 252 | <i>Poritia erycinoides</i> (C. & R. Felder, [1865])   | Lycaenidae | 1               | 0               | 1               | 0                | 0                | 0                | 1                | 0                | 0                 | 0                 | 0                 | 0                 | 0                 | 0                 | 0                 | 0                 | 0                 | 0                 | 0                 | 0                | 0                | 0               |
| 253 | <i>Miletus chinensis</i> C. Felder, 1862              | Lycaenidae | 1               | 1               | 1               | 1                | 1                | 1                | 1                | 1                | 1                 | 1                 | 1                 | 0                 | 0                 | 0                 | 0                 | 0                 | 0                 | 0                 | 0                 | 0                | 0                | 0               |
| 254 | <i>Miletus mallus</i> (Fruhstorfer, 1913)             | Lycaenidae | 1               | 1               | 1               | 1                | 1                | 1                | 1                | 1                | 1                 | 1                 | 1                 | 0                 | 0                 | 0                 | 0                 | 0                 | 0                 | 0                 | 0                 | 0                | 0                | 0               |
| 255 | <i>Miletus bannanus</i> Huang & Xue, 2004             | Lycaenidae | 1               | 0               | 0               | 0                | 0                | 0                | 0                | 0                | 0                 | 0                 | 0                 | 0                 | 0                 | 0                 | 0                 | 0                 | 0                 | 0                 | 0                 | 0                | 0                | 0               |
| 256 | <i>Allotinus drumila</i> (Moore, [1866])              | Lycaenidae | 1               | 0               | 0               | 0                | 0                | 0                | 0                | 0                | 0                 | 0                 | 0                 | 0                 | 0                 | 0                 | 0                 | 0                 | 0                 | 0                 | 0                 | 0                | 0                | 0               |
| 257 | <i>Logania marmorata</i> Moore, 1884                  | Lycaenidae | 1               | 0               | 0               | 0                | 0                | 0                | 0                | 0                | 0                 | 0                 | 0                 | 0                 | 0                 | 0                 | 0                 | 0                 | 0                 | 0                 | 0                 | 0                | 0                | 0               |
| 258 | <i>Spalgis epius</i> (Westwood, [1851])               | Lycaenidae | 1               | 1               | 0               | 0                | 0                | 0                | 0                | 0                | 0                 | 0                 | 0                 | 0                 | 0                 | 0                 | 0                 | 0                 | 0                 | 0                 | 0                 | 0                | 0                | 0               |
| 259 | <i>Taraka hamada</i> (Druce, 1875)                    | Lycaenidae | 1               | 1               | 1               | 1                | 1                | 1                | 1                | 1                | 1                 | 1                 | 1                 | 1                 | 1                 | 1                 | 1                 | 1                 | 1                 | 1                 | 1                 | 1                | 1                | 0               |
| 260 | <i>Curetis bulis</i> (Westwood, [1851])               | Lycaenidae | 1               | 1               | 1               | 1                | 1                | 1                | 1                | 1                | 1                 | 1                 | 1                 | 0                 | 0                 | 0                 | 0                 | 0                 | 0                 | 0                 | 0                 | 0                | 0                | 0               |
| 261 | <i>Curetis acuta</i> Moore, 1877                      | Lycaenidae | 1               | 1               | 1               | 1                | 1                | 1                | 1                | 1                | 1                 | 1                 | 1                 | 0                 | 0                 | 0                 | 0                 | 0                 | 0                 | 0                 | 0                 | 1                | 1                | 0               |
| 262 | <i>Shirozua melpomene</i> (Leech, 1890)               | Lycaenidae | 0               | 0               | 0               | 0                | 0                | 0                | 0                | 0                | 0                 | 0                 | 0                 | 0                 | 0                 | 0                 | 0                 | 0                 | 0                 | 0                 | 0                 | 0                | 0                | 1               |
| 263 | <i>Thecla ohyai</i> (Leech, 1890)                     | Lycaenidae | 0               | 0               | 0               | 0                | 0                | 0                | 0                | 0                | 0                 | 0                 | 0                 | 0                 | 0                 | 0                 | 0                 | 0                 | 0                 | 1                 | 0                 | 0                | 0                | 0               |
| 264 | <i>Gonerilia seraphim</i> (Oberthür, 1886)            | Lycaenidae | 0               | 0               | 0               | 0                | 0                | 0                | 0                | 0                | 0                 | 0                 | 0                 | 0                 | 0                 | 0                 | 0                 | 0                 | 0                 | 0                 | 0                 | 0                | 0                | 1               |
| 265 | <i>Howarthia caelestis</i> (Leech, 1890)              | Lycaenidae | 0               | 0               | 0               | 0                | 0                | 0                | 0                | 0                | 0                 | 0                 | 1                 | 0                 | 0                 | 0                 | 1                 | 1                 | 1                 | 1                 | 1                 | 0                | 0                | 1               |
| 266 | <i>Teratozephyrus tsukiyamahiroshii</i> Fujioka, 1994 | Lycaenidae | 0               | 0               | 0               | 0                | 0                | 0                | 0                | 0                | 0                 | 0                 | 0                 | 0                 | 0                 | 0                 | 1                 | 0                 | 0                 | 0                 | 1                 | 0                | 0                | 0               |
| 267 | <i>Fujiokaozephyrus tsangkie</i> (Oberthür, 1886)     | Lycaenidae | 0               | 0               | 0               | 0                | 0                | 0                | 0                | 0                | 0                 | 0                 | 1                 | 0                 | 0                 | 0                 | 1                 | 1                 | 1                 | 1                 | 1                 | 0                | 0                | 1               |
| 268 | <i>Esakiozephyrus icana</i> (Moore, [1875])           | Lycaenidae | 0               | 0               | 0               | 0                | 0                | 0                | 0                | 0                | 0                 | 0                 | 1                 | 0                 | 0                 | 0                 | 1                 | 1                 | 1                 | 1                 | 1                 | 0                | 0                | 1               |
| 269 | <i>Iwaseozephyrus bieti</i> (Oberthür, 1886)          | Lycaenidae | 0               | 0               | 0               | 0                | 0                | 0                | 0                | 0                | 0                 | 0                 | 1                 | 1                 | 0                 | 0                 | 0                 | 0                 | 1                 | 1                 | 1                 | 0                | 0                | 1               |
| 270 | <i>Kameiozephyrus neis</i> (Oberthür, 1914)           | Lycaenidae | 0               | 0               | 0               | 0                | 0                | 0                | 0                | 0                | 0                 | 0                 | 0                 | 0                 | 0                 | 0                 | 0                 | 0                 | 1                 | 1                 | 0                 | 0                | 0                | 1               |
| 271 | <i>Neozephyrus helenae</i> Howarth, 1957              | Lycaenidae | 0               | 0               | 0               | 0                | 0                | 0                | 0                | 0                | 0                 | 0                 | 0                 | 0                 | 0                 | 0                 | 0                 | 0                 | 0                 | 0                 | 0                 | 0                | 0                | 1               |
| 272 | <i>Neozephyrus dubernardi</i> (Riley, 1939)           | Lycaenidae | 0               | 0               | 0               | 0                | 0                | 0                | 0                | 0                | 0                 | 0                 | 1                 | 0                 | 0                 | 0                 | 0                 | 0                 | 1                 | 0                 | 0                 | 0                | 0                | 1               |
| 273 | <i>Neozephyrus uedai</i> Koiwaya, 1996                | Lycaenidae | 0               | 0               | 0               | 0                | 0                | 0                | 1                | 0                | 0                 | 0                 | 0                 | 0                 | 0                 | 0                 | 0                 | 0                 | 0                 | 0                 | 0                 | 0                | 0                | 1               |
| 274 | <i>Chrysozephyrus scintillans</i> (Leech, [1893])     | Lycaenidae | 1               | 0               | 0               | 0                | 0                | 0                | 0                | 0                | 0                 | 0                 | 0                 | 0                 | 0                 | 0                 | 0                 | 0                 | 0                 | 0                 | 0                 | 0                | 0                | 1               |
| 275 | <i>Chrysozephyrus marginatus</i> (Howarth, 1957)      | Lycaenidae | 0               | 0               | 0               | 0                | 0                | 0                | 0                | 0                | 0                 | 0                 | 0                 | 0                 | 0                 | 0                 | 0                 | 0                 | 1                 | 0                 | 0                 | 0                | 0                | 1               |
| 276 | <i>Chrysozephyrus meili</i> Yoshino, 1999             | Lycaenidae | 0               | 0               | 0               | 0                | 0                | 0                | 0                | 0                | 0                 | 0                 | 0                 | 0                 | 0                 | 0                 | 0                 | 0                 | 0                 | 0                 | 0                 | 0                | 0                | 1               |
| 277 | <i>Chrysozephyrus yunnanensis</i> (Howarth, 1957)     | Lycaenidae | 0               | 0               | 0               | 0                | 0                | 0                | 0                | 0                | 0                 | 0                 | 1                 | 0                 | 0                 | 0                 | 0                 | 0                 | 1                 | 0                 | 0                 | 0                | 0                | 1               |
| 278 | <i>Chrysozephyrus souleanus</i> (Riley, 1939)         | Lycaenidae | 0               | 0               | 0               | 0                | 0                | 0                | 0                | 0                | 1                 | 0                 | 1                 | 0                 | 0                 | 0                 | 1                 | 1                 | 1                 | 1                 | 0                 | 0                | 0                | 1               |
| 279 | <i>Chrysozephyrus watsoni</i> (Evans, 1927)           | Lycaenidae | 0               | 0               | 0               | 0                | 0                | 0                | 0                | 0                | 0                 | 0                 | 1                 | 0                 | 0                 | 0                 | 0                 | 0                 | 0                 | 1                 | 0                 | 0                | 0                | 1               |

| No. | Pollinating butterfly species                      | Family     | I               |                 |                 | II               |                  |                  |                  |                  | III               |                   |                   |                   |                   |                   |                   |                   |                   |                   |                   |                  |                  |                 | IV             |  |  | V |
|-----|----------------------------------------------------|------------|-----------------|-----------------|-----------------|------------------|------------------|------------------|------------------|------------------|-------------------|-------------------|-------------------|-------------------|-------------------|-------------------|-------------------|-------------------|-------------------|-------------------|-------------------|------------------|------------------|-----------------|----------------|--|--|---|
|     |                                                    |            | I <sub>A</sub>  |                 | I <sub>B</sub>  | II <sub>A</sub>  |                  |                  | II <sub>B</sub>  |                  | III <sub>A</sub>  |                   |                   |                   | III <sub>B</sub>  |                   |                   |                   |                   |                   |                   | IV <sub>A</sub>  |                  |                 | V <sub>A</sub> |  |  |   |
|     |                                                    |            | I <sub>A1</sub> | I <sub>A2</sub> | I <sub>B1</sub> | II <sub>A1</sub> | II <sub>A2</sub> | II <sub>A3</sub> | II <sub>B1</sub> | II <sub>B2</sub> | III <sub>A1</sub> | III <sub>A2</sub> | III <sub>A3</sub> | III <sub>A4</sub> | III <sub>B1</sub> | III <sub>B2</sub> | III <sub>B3</sub> | III <sub>B4</sub> | III <sub>B5</sub> | III <sub>B6</sub> | III <sub>B7</sub> | IV <sub>A1</sub> | IV <sub>A2</sub> | V <sub>A1</sub> |                |  |  |   |
| 280 | <i>Chrysozephyrus disparatus</i> (Howarth, 1957)   | Lycaenidae | 0               | 0               | 0               | 0                | 0                | 0                | 0                | 0                | 0                 | 1                 | 0                 | 0                 | 0                 | 0                 | 0                 | 0                 | 0                 | 1                 | 0                 | 0                | 0                | 1               |                |  |  |   |
| 281 | <i>Shirozuozephyrus paona</i> (Tytler, 1915)       | Lycaenidae | 0               | 0               | 0               | 0                | 0                | 0                | 0                | 0                | 0                 | 1                 | 0                 | 0                 | 0                 | 0                 | 0                 | 0                 | 0                 | 1                 | 0                 | 0                | 0                | 1               |                |  |  |   |
| 282 | <i>Favonius watanabei</i> Koiwaya, 2002            | Lycaenidae | 0               | 0               | 0               | 0                | 0                | 0                | 0                | 0                | 0                 | 0                 | 0                 | 0                 | 0                 | 0                 | 0                 | 0                 | 0                 | 0                 | 0                 | 0                | 0                | 1               |                |  |  |   |
| 283 | <i>Iraota timoleon</i> (Stoll, 1790)               | Lycaenidae | 1               | 1               | 1               | 0                | 0                | 0                | 0                | 0                | 0                 | 0                 | 0                 | 0                 | 0                 | 0                 | 0                 | 0                 | 0                 | 0                 | 0                 | 0                | 0                | 0               |                |  |  |   |
| 284 | <i>Hypolycaena erylus</i> (Godart, 1824)           | Lycaenidae | 1               | 1               | 1               | 1                | 1                | 1                | 1                | 1                | 0                 | 0                 | 0                 | 0                 | 0                 | 0                 | 0                 | 0                 | 0                 | 0                 | 0                 | 0                | 0                | 0               |                |  |  |   |
| 285 | <i>Zeltus amasa</i> (Hewitson, 1869)               | Lycaenidae | 1               | 1               | 1               | 1                | 1                | 1                | 1                | 1                | 0                 | 0                 | 0                 | 0                 | 0                 | 0                 | 0                 | 0                 | 0                 | 0                 | 0                 | 0                | 0                | 0               |                |  |  |   |
| 286 | <i>Chliaria kina</i> (Hewitson, 1869)              | Lycaenidae | 1               | 1               | 0               | 0                | 1                | 1                | 1                | 0                | 0                 | 1                 | 1                 | 1                 | 0                 | 0                 | 0                 | 0                 | 0                 | 0                 | 0                 | 0                | 0                | 0               |                |  |  |   |
| 287 | <i>Chliaria othona</i> (Hewitson, [1865])          | Lycaenidae | 1               | 1               | 0               | 0                | 0                | 0                | 0                | 0                | 0                 | 0                 | 0                 | 0                 | 0                 | 0                 | 0                 | 0                 | 0                 | 0                 | 0                 | 0                | 0                | 0               |                |  |  |   |
| 288 | <i>Deudorix epijarbas</i> (Moore, 1858)            | Lycaenidae | 1               | 0               | 1               | 0                | 0                | 0                | 0                | 1                | 0                 | 0                 | 0                 | 0                 | 0                 | 0                 | 1                 | 0                 | 0                 | 0                 | 0                 | 0                | 0                | 0               |                |  |  |   |
| 289 | <i>Deudorix reperculsa</i> (Leech, 1890)           | Lycaenidae | 0               | 0               | 0               | 0                | 0                | 0                | 0                | 0                | 0                 | 0                 | 0                 | 0                 | 0                 | 0                 | 1                 | 0                 | 0                 | 1                 | 0                 | 0                | 0                | 1               |                |  |  |   |
| 290 | <i>Artipe eryx</i> (Linnaeus, 1771)                | Lycaenidae | 0               | 0               | 0               | 0                | 0                | 0                | 0                | 1                | 0                 | 0                 | 0                 | 0                 | 0                 | 0                 | 0                 | 0                 | 1                 | 0                 | 0                 | 0                | 0                | 0               |                |  |  |   |
| 291 | <i>Sinthus chandrana</i> (Moore, 1882)             | Lycaenidae | 1               | 1               | 1               | 1                | 1                | 1                | 1                | 1                | 0                 | 0                 | 0                 | 1                 | 0                 | 0                 | 0                 | 0                 | 0                 | 0                 | 0                 | 1                | 1                | 0               |                |  |  |   |
| 292 | <i>Sinthus virgo</i> (Elwes, 1887)                 | Lycaenidae | 0               | 0               | 0               | 0                | 0                | 1                | 0                | 0                | 0                 | 1                 | 0                 | 1                 | 0                 | 0                 | 0                 | 0                 | 0                 | 0                 | 0                 | 0                | 0                | 0               |                |  |  |   |
| 293 | <i>Sinthus menglaensis</i> (Wang, 1997)            | Lycaenidae | 1               | 0               | 0               | 0                | 0                | 0                | 0                | 0                | 0                 | 0                 | 0                 | 0                 | 0                 | 0                 | 0                 | 0                 | 0                 | 0                 | 0                 | 0                | 0                | 0               |                |  |  |   |
| 294 | <i>Araotes lapithis</i> (Moore, [1858])            | Lycaenidae | 1               | 0               | 0               | 0                | 0                | 0                | 0                | 0                | 0                 | 0                 | 0                 | 0                 | 0                 | 0                 | 0                 | 0                 | 0                 | 0                 | 0                 | 0                | 0                | 0               |                |  |  |   |
| 295 | <i>Bindahara phocides</i> (Fabricius, 1793)        | Lycaenidae | 1               | 1               | 0               | 0                | 0                | 0                | 0                | 0                | 0                 | 0                 | 0                 | 0                 | 0                 | 0                 | 0                 | 0                 | 0                 | 0                 | 0                 | 0                | 0                | 0               |                |  |  |   |
| 296 | <i>Rapala nissa</i> (Kollar, [1844])               | Lycaenidae | 0               | 0               | 0               | 0                | 0                | 0                | 0                | 0                | 0                 | 0                 | 0                 | 1                 | 0                 | 0                 | 0                 | 0                 | 0                 | 0                 | 0                 | 0                | 0                | 1               |                |  |  |   |
| 297 | <i>Rapala iarbus</i> (Fabricius, 1787)             | Lycaenidae | 1               | 0               | 0               | 1                | 0                | 0                | 0                | 0                | 0                 | 0                 | 0                 | 0                 | 0                 | 0                 | 0                 | 0                 | 0                 | 0                 | 0                 | 0                | 0                | 0               |                |  |  |   |
| 298 | <i>Rapala varuna</i> (Horsfield, 1829)             | Lycaenidae | 1               | 1               | 1               | 1                | 1                | 1                | 1                | 1                | 0                 | 0                 | 0                 | 0                 | 0                 | 0                 | 0                 | 0                 | 0                 | 0                 | 0                 | 0                | 0                | 0               |                |  |  |   |
| 299 | <i>Rapala pheretima</i> (Hewitson, 1863)           | Lycaenidae | 1               | 1               | 0               | 1                | 0                | 1                | 0                | 0                | 0                 | 0                 | 0                 | 0                 | 0                 | 0                 | 0                 | 0                 | 0                 | 0                 | 0                 | 0                | 0                | 0               |                |  |  |   |
| 300 | <i>Rapala hades</i> (de Nicéville, [1895])         | Lycaenidae | 1               | 0               | 0               | 0                | 0                | 0                | 0                | 0                | 0                 | 0                 | 0                 | 0                 | 0                 | 0                 | 0                 | 0                 | 0                 | 0                 | 0                 | 0                | 0                | 0               |                |  |  |   |
| 301 | <i>Rapala caerulea</i> (Bremer & Grey, [1851])     | Lycaenidae | 0               | 0               | 0               | 0                | 0                | 0                | 0                | 0                | 0                 | 0                 | 0                 | 0                 | 1                 | 0                 | 0                 | 0                 | 0                 | 0                 | 0                 | 0                | 0                | 1               |                |  |  |   |
| 302 | <i>Loxura atymnus</i> (Stoll, [1780])              | Lycaenidae | 1               | 1               | 1               | 1                | 1                | 1                | 1                | 1                | 0                 | 0                 | 0                 | 0                 | 0                 | 0                 | 0                 | 0                 | 0                 | 0                 | 0                 | 0                | 0                | 0               |                |  |  |   |
| 303 | <i>Yasoda androconifera</i> Fruhstorfer, 1912      | Lycaenidae | 0               | 0               | 1               | 0                | 0                | 0                | 0                | 1                | 0                 | 0                 | 0                 | 0                 | 0                 | 0                 | 0                 | 0                 | 0                 | 0                 | 0                 | 0                | 0                | 0               |                |  |  |   |
| 304 | <i>Yasoda tripunctata</i> (Hewison, [1863])        | Lycaenidae | 1               | 0               | 1               | 1                | 0                | 0                | 0                | 1                | 0                 | 0                 | 0                 | 0                 | 0                 | 0                 | 0                 | 0                 | 0                 | 0                 | 0                 | 0                | 0                | 0               |                |  |  |   |
| 305 | <i>Pratapa deva</i> (Moore, [1858])                | Lycaenidae | 1               | 0               | 0               | 1                | 0                | 0                | 0                | 0                | 0                 | 0                 | 0                 | 0                 | 0                 | 0                 | 0                 | 0                 | 0                 | 0                 | 0                 | 0                | 0                | 0               |                |  |  |   |
| 306 | <i>Tajuria maculata</i> (Hewitson, [1865])         | Lycaenidae | 0               | 0               | 1               | 0                | 0                | 0                | 1                | 1                | 0                 | 0                 | 0                 | 0                 | 0                 | 0                 | 0                 | 0                 | 1                 | 0                 | 0                 | 0                | 0                | 0               |                |  |  |   |
| 307 | <i>Tajuria cippus</i> (Fabricius, 1798)            | Lycaenidae | 1               | 1               | 1               | 1                | 1                | 1                | 1                | 1                | 0                 | 0                 | 0                 | 0                 | 0                 | 0                 | 0                 | 0                 | 0                 | 0                 | 0                 | 0                | 0                | 0               |                |  |  |   |
| 308 | <i>Tajuria diaeus</i> (Hewitson, [1865])           | Lycaenidae | 0               | 0               | 0               | 0                | 0                | 0                | 0                | 0                | 0                 | 1                 | 1                 | 0                 | 0                 | 0                 | 1                 | 0                 | 0                 | 1                 | 1                 | 0                | 0                | 1               |                |  |  |   |
| 309 | <i>Dacalana penicilligera</i> (de Nicéville, 1890) | Lycaenidae | 1               | 0               | 0               | 0                | 0                | 0                | 0                | 0                | 0                 | 0                 | 0                 | 0                 | 0                 | 0                 | 0                 | 0                 | 0                 | 0                 | 0                 | 0                | 0                | 0               |                |  |  |   |
| 310 | <i>Creon cleobis</i> (Godart, [1824])              | Lycaenidae | 1               | 0               | 0               | 1                | 0                | 0                | 0                | 0                | 0                 | 0                 | 0                 | 0                 | 0                 | 0                 | 0                 | 0                 | 0                 | 0                 | 0                 | 0                | 0                | 0               |                |  |  |   |
| 311 | <i>Neocheritra fabronia</i> (Hewitson, 1878)       | Lycaenidae | 0               | 0               | 0               | 1                | 0                | 0                | 0                | 0                | 0                 | 0                 | 0                 | 0                 | 0                 | 0                 | 0                 | 0                 | 0                 | 0                 | 0                 | 0                | 0                | 0               |                |  |  |   |
| 312 | <i>Charana mandarinus</i> (Hewitson, [1863])       | Lycaenidae | 1               | 0               | 1               | 1                | 0                | 0                | 1                | 1                | 0                 | 0                 | 0                 | 0                 | 0                 | 0                 | 0                 | 0                 | 1                 | 0                 | 0                 | 0                | 0                | 0               |                |  |  |   |
| 313 | <i>Suasa lisides</i> (Hewitson, [1863])            | Lycaenidae | 1               | 0               | 0               | 0                | 0                | 0                | 0                | 0                | 0                 | 0                 | 0                 | 0                 | 0                 | 0                 | 0                 | 0                 | 0                 | 0                 | 0                 | 0                | 0                | 0               |                |  |  |   |
| 314 | <i>Arhopala pseudocentaurus</i> (Doubleday, 1857)  | Lycaenidae | 1               | 1               | 1               | 1                | 1                | 1                | 1                | 1                | 0                 | 0                 | 0                 | 0                 | 0                 | 0                 | 0                 | 0                 | 0                 | 0                 | 0                 | 0                | 0                | 0               |                |  |  |   |
| 315 | <i>Arhopala dispar</i> Riley et Godfrey, 1921      | Lycaenidae | 1               | 0               | 0               | 0                | 0                | 0                | 0                | 0                | 0                 | 0                 | 0                 | 0                 | 0                 | 0                 | 0                 | 0                 | 0                 | 0                 | 0                 | 0                | 0                | 0               |                |  |  |   |
| 316 | <i>Arhopala rama</i> Kollar, 1844                  | Lycaenidae | 1               | 1               | 1               | 1                | 1                | 1                | 1                | 1                | 0                 | 0                 | 0                 | 0                 | 0                 | 0                 | 1                 | 0                 | 1                 | 0                 | 0                 | 0                | 0                | 0               |                |  |  |   |
| 317 | <i>Arhopala bazalus</i> (Hewitson, 1862)           | Lycaenidae | 1               | 1               | 1               | 1                | 1                | 1                | 1                | 1                | 1                 | 0                 | 0                 | 0                 | 0                 | 0                 | 1                 | 0                 | 1                 | 0                 | 0                 | 0                | 0                | 0               |                |  |  |   |
| 318 | <i>Arhopala eumolphus</i> (Cramer, [1780])         | Lycaenidae | 1               | 0               | 0               | 1                | 0                | 0                | 0                | 0                | 0                 | 0                 | 0                 | 0                 | 0                 | 0                 | 0                 | 0                 | 0                 | 0                 | 0                 | 0                | 0                | 0               |                |  |  |   |
| 319 | <i>Arhopala paramuta</i> (de Nicéville, 1884)      | Lycaenidae | 1               | 0               | 0               | 1                | 0                | 0                | 0                | 0                | 0                 | 0                 | 0                 | 0                 | 0                 | 0                 | 0                 | 0                 | 0                 | 0                 | 0                 | 0                | 0                | 0               |                |  |  |   |



| No. | Pollinating butterfly species                          | Family     | I               |                 |                 | II               |                  |                  |                  |                  | III               |                   |                   |                   |                   |                   |                   |                   |                   |                   |                   |                  |                  |                 | IV             |  |  | V |
|-----|--------------------------------------------------------|------------|-----------------|-----------------|-----------------|------------------|------------------|------------------|------------------|------------------|-------------------|-------------------|-------------------|-------------------|-------------------|-------------------|-------------------|-------------------|-------------------|-------------------|-------------------|------------------|------------------|-----------------|----------------|--|--|---|
|     |                                                        |            | I <sub>A</sub>  |                 | I <sub>B</sub>  | II <sub>A</sub>  |                  |                  | II <sub>B</sub>  |                  | III <sub>A</sub>  |                   |                   |                   | III <sub>B</sub>  |                   |                   |                   |                   |                   |                   | IV <sub>A</sub>  |                  |                 | V <sub>A</sub> |  |  |   |
|     |                                                        |            | I <sub>A1</sub> | I <sub>A2</sub> | I <sub>B1</sub> | II <sub>A1</sub> | II <sub>A2</sub> | II <sub>A3</sub> | II <sub>B1</sub> | II <sub>B2</sub> | III <sub>A1</sub> | III <sub>A2</sub> | III <sub>A3</sub> | III <sub>A4</sub> | III <sub>B1</sub> | III <sub>B2</sub> | III <sub>B3</sub> | III <sub>B4</sub> | III <sub>B5</sub> | III <sub>B6</sub> | III <sub>B7</sub> | IV <sub>A1</sub> | IV <sub>A2</sub> | V <sub>A1</sub> |                |  |  |   |
| 320 | <i>Arhopala ganesa</i> (Moore, 1857)                   | Lycaenidae | 1               | 0               | 0               | 0                | 0                | 0                | 0                | 0                | 0                 | 0                 | 0                 | 0                 | 0                 | 0                 | 0                 | 0                 | 0                 | 0                 | 0                 | 0                | 0                | 0               |                |  |  |   |
| 321 | <i>Arhopala birmana</i> (Moore, [1884])                | Lycaenidae | 1               | 0               | 0               | 1                | 0                | 0                | 0                | 0                | 0                 | 0                 | 0                 | 0                 | 0                 | 0                 | 0                 | 0                 | 0                 | 0                 | 0                 | 0                | 0                | 0               |                |  |  |   |
| 322 | <i>Thaduka multicaudata</i> Moore, [1879]              | Lycaenidae | 1               | 0               | 0               | 0                | 0                | 0                | 0                | 0                | 0                 | 0                 | 0                 | 0                 | 0                 | 0                 | 0                 | 0                 | 0                 | 0                 | 0                 | 0                | 0                | 0               |                |  |  |   |
| 323 | <i>Mahathala ariadeva</i> (Fruhstorfer, 1908)          | Lycaenidae | 1               | 1               | 1               | 1                | 1                | 1                | 1                | 1                | 0                 | 0                 | 0                 | 0                 | 0                 | 0                 | 0                 | 0                 | 0                 | 0                 | 0                 | 0                | 0                | 0               |                |  |  |   |
| 324 | <i>Flos asoka</i> (de Nicéville, 1883)                 | Lycaenidae | 1               | 1               | 0               | 1                | 0                | 0                | 0                | 0                | 0                 | 0                 | 0                 | 0                 | 0                 | 0                 | 0                 | 0                 | 0                 | 0                 | 0                 | 0                | 0                | 0               |                |  |  |   |
| 325 | <i>Flos adriana</i> (C. & R. Felder, 1865)             | Lycaenidae | 1               | 1               | 1               | 1                | 1                | 1                | 1                | 1                | 0                 | 0                 | 0                 | 0                 | 0                 | 0                 | 0                 | 0                 | 0                 | 0                 | 0                 | 0                | 0                | 0               |                |  |  |   |
| 326 | <i>Mota massyla</i> (Hewitson, [1869])                 | Lycaenidae | 1               | 1               | 0               | 0                | 0                | 0                | 0                | 0                | 0                 | 0                 | 0                 | 0                 | 0                 | 0                 | 0                 | 0                 | 0                 | 0                 | 0                 | 0                | 0                | 0               |                |  |  |   |
| 327 | <i>Surendra quercetorum</i> (Moore, [1858])            | Lycaenidae | 1               | 1               | 0               | 1                | 0                | 0                | 0                | 0                | 0                 | 0                 | 0                 | 0                 | 0                 | 0                 | 0                 | 0                 | 0                 | 0                 | 0                 | 0                | 0                | 0               |                |  |  |   |
| 328 | <i>Horaga onyx</i> (Moore, [1858])                     | Lycaenidae | 1               | 1               | 1               | 1                | 1                | 1                | 1                | 1                | 0                 | 0                 | 0                 | 0                 | 0                 | 0                 | 0                 | 0                 | 0                 | 0                 | 0                 | 0                | 0                | 0               |                |  |  |   |
| 329 | <i>Horaga syrinx</i> (C. Felder, 1860)                 | Lycaenidae | 1               | 1               | 1               | 1                | 1                | 1                | 1                | 1                | 0                 | 0                 | 0                 | 0                 | 0                 | 0                 | 0                 | 0                 | 0                 | 0                 | 0                 | 0                | 0                | 0               |                |  |  |   |
| 330 | <i>Cheritrella truncipennis</i> de Nicéville, 1887     | Lycaenidae | 1               | 0               | 0               | 1                | 0                | 1                | 0                | 0                | 0                 | 1                 | 0                 | 0                 | 0                 | 0                 | 0                 | 0                 | 0                 | 0                 | 0                 | 0                | 0                | 0               |                |  |  |   |
| 331 | <i>Ticherra acte</i> (Moore, [1858])                   | Lycaenidae | 1               | 1               | 0               | 1                | 1                | 1                | 0                | 0                | 0                 | 0                 | 0                 | 0                 | 0                 | 0                 | 0                 | 0                 | 0                 | 0                 | 0                 | 0                | 0                | 0               |                |  |  |   |
| 332 | <i>Remelana jangala</i> (Horsfield, [1829])            | Lycaenidae | 1               | 1               | 0               | 1                | 1                | 1                | 0                | 0                | 0                 | 0                 | 0                 | 0                 | 0                 | 0                 | 0                 | 0                 | 0                 | 0                 | 0                 | 0                | 0                | 0               |                |  |  |   |
| 333 | <i>Ancema ctesia</i> (Hewitson, [1865])                | Lycaenidae | 1               | 1               | 1               | 1                | 1                | 1                | 1                | 1                | 1                 | 1                 | 1                 | 1                 | 1                 | 1                 | 1                 | 0                 | 0                 | 1                 | 0                 | 0                | 0                | 0               |                |  |  |   |
| 334 | <i>Ahlbergia pluto</i> (Leech, [1893])                 | Lycaenidae | 0               | 0               | 0               | 0                | 0                | 0                | 0                | 0                | 0                 | 0                 | 0                 | 0                 | 0                 | 1                 | 1                 | 1                 | 0                 | 1                 | 1                 | 0                | 0                | 1               |                |  |  |   |
| 335 | <i>Ahlbergia circe</i> (Leech, [1893])                 | Lycaenidae | 0               | 0               | 0               | 0                | 0                | 0                | 0                | 0                | 0                 | 0                 | 0                 | 0                 | 0                 | 1                 | 1                 | 1                 | 0                 | 1                 | 1                 | 0                | 0                | 1               |                |  |  |   |
| 336 | <i>Ahlbergia contexta</i> (Johnson, 1992)              | Lycaenidae | 0               | 0               | 0               | 0                | 0                | 0                | 0                | 0                | 0                 | 0                 | 0                 | 0                 | 0                 | 1                 | 1                 | 1                 | 0                 | 1                 | 1                 | 0                | 0                | 1               |                |  |  |   |
| 337 | <i>Ahlbergia prodiga</i> Johnson, 1992                 | Lycaenidae | 0               | 0               | 0               | 0                | 0                | 0                | 0                | 0                | 0                 | 0                 | 0                 | 0                 | 0                 | 1                 | 1                 | 1                 | 0                 | 1                 | 1                 | 0                | 0                | 1               |                |  |  |   |
| 338 | <i>Ahlbergia clarolinea</i> Huang & Chen, 2006         | Lycaenidae | 0               | 0               | 0               | 0                | 0                | 0                | 0                | 0                | 0                 | 0                 | 0                 | 0                 | 0                 | 0                 | 1                 | 0                 | 0                 | 1                 | 0                 | 0                | 0                | 1               |                |  |  |   |
| 339 | <i>Ahlbergia chalcidis</i> Chou & Li, 1994             | Lycaenidae | 0               | 0               | 0               | 0                | 0                | 0                | 0                | 0                | 0                 | 0                 | 0                 | 0                 | 0                 | 0                 | 1                 | 1                 | 0                 | 1                 | 0                 | 0                | 0                | 1               |                |  |  |   |
| 340 | <i>Satyrium eximia</i> (Fixsen, 1887)                  | Lycaenidae | 0               | 0               | 0               | 0                | 0                | 0                | 0                | 0                | 0                 | 0                 | 0                 | 0                 | 0                 | 0                 | 1                 | 0                 | 0                 | 1                 | 1                 | 0                | 0                | 1               |                |  |  |   |
| 341 | <i>Satyrium oenone</i> (Leech, [1893])                 | Lycaenidae | 0               | 0               | 0               | 0                | 0                | 0                | 0                | 0                | 0                 | 0                 | 0                 | 0                 | 0                 | 0                 | 0                 | 1                 | 0                 | 0                 | 0                 | 0                | 0                | 1               |                |  |  |   |
| 342 | <i>Catapacilma major</i> Druce, 1895                   | Lycaenidae | 1               | 1               | 0               | 1                | 1                | 1                | 0                | 0                | 0                 | 0                 | 0                 | 0                 | 0                 | 0                 | 0                 | 0                 | 0                 | 0                 | 0                 | 0                | 0                | 0               |                |  |  |   |
| 343 | <i>Spindasis leechi</i> (Swinhoe, 1912)                | Lycaenidae | 0               | 0               | 0               | 0                | 0                | 0                | 0                | 0                | 0                 | 0                 | 0                 | 0                 | 0                 | 1                 | 1                 | 0                 | 0                 | 1                 | 1                 | 0                | 0                | 1               |                |  |  |   |
| 344 | <i>Spindasis syama</i> (Horsfield, [1829])             | Lycaenidae | 1               | 1               | 1               | 1                | 1                | 1                | 1                | 1                | 0                 | 0                 | 0                 | 0                 | 0                 | 0                 | 0                 | 0                 | 1                 | 0                 | 0                 | 0                | 0                | 0               |                |  |  |   |
| 345 | <i>Spindasis lohita</i> (Horsfield, [1829])            | Lycaenidae | 1               | 1               | 1               | 1                | 1                | 1                | 1                | 1                | 0                 | 0                 | 0                 | 1                 | 0                 | 0                 | 0                 | 0                 | 1                 | 0                 | 0                 | 0                | 0                | 0               |                |  |  |   |
| 346 | <i>Spindasis rukma</i> (de Nicéville, [1889])          | Lycaenidae | 0               | 0               | 0               | 0                | 0                | 0                | 0                | 0                | 0                 | 0                 | 0                 | 0                 | 0                 | 0                 | 1                 | 0                 | 0                 | 1                 | 0                 | 0                | 0                | 1               |                |  |  |   |
| 347 | <i>Lycaena li</i> (Oberthür, 1886)                     | Lycaenidae | 0               | 0               | 0               | 0                | 0                | 0                | 0                | 0                | 0                 | 0                 | 1                 | 1                 | 1                 | 1                 | 1                 | 1                 | 1                 | 1                 | 1                 | 1                | 1                | 1               |                |  |  |   |
| 348 | <i>Lycaena ouang</i> (Oberthür, 1891)                  | Lycaenidae | 0               | 0               | 0               | 0                | 0                | 0                | 0                | 0                | 0                 | 0                 | 1                 | 1                 | 0                 | 0                 | 0                 | 0                 | 0                 | 1                 | 0                 | 0                | 0                | 1               |                |  |  |   |
| 349 | <i>Lycaena pang</i> (Oberthür, 1886)                   | Lycaenidae | 0               | 0               | 0               | 0                | 0                | 0                | 0                | 0                | 0                 | 0                 | 0                 | 0                 | 0                 | 0                 | 0                 | 0                 | 0                 | 1                 | 0                 | 0                | 0                | 1               |                |  |  |   |
| 350 | <i>Heliophorus saphir</i> (Blanchard, [1871])          | Lycaenidae | 0               | 0               | 0               | 0                | 0                | 0                | 0                | 0                | 0                 | 0                 | 0                 | 0                 | 0                 | 0                 | 0                 | 0                 | 0                 | 0                 | 0                 | 1                | 1                | 0               |                |  |  |   |
| 351 | <i>Heliophorus saphiroides</i> Murayama, 1992          | Lycaenidae | 0               | 0               | 0               | 0                | 0                | 0                | 0                | 0                | 0                 | 0                 | 0                 | 0                 | 0                 | 0                 | 1                 | 0                 | 0                 | 0                 | 0                 | 0                | 0                | 0               |                |  |  |   |
| 352 | <i>Heliophorus androcles</i> (Westwood, [1851])        | Lycaenidae | 0               | 1               | 0               | 0                | 1                | 0                | 0                | 0                | 0                 | 1                 | 1                 | 1                 | 0                 | 0                 | 0                 | 0                 | 0                 | 0                 | 0                 | 0                | 0                | 0               |                |  |  |   |
| 353 | <i>Heliophorus brahma</i> (Moore, [1858])              | Lycaenidae | 1               | 1               | 1               | 1                | 1                | 1                | 1                | 1                | 1                 | 1                 | 1                 | 1                 | 1                 | 0                 | 0                 | 1                 | 0                 | 0                 | 0                 | 0                | 0                | 1               |                |  |  |   |
| 354 | <i>Heliophorus eventa</i> (Fruhstorfer, 1918)          | Lycaenidae | 0               | 0               | 0               | 0                | 0                | 0                | 0                | 0                | 1                 | 1                 | 1                 | 1                 | 1                 | 1                 | 1                 | 1                 | 1                 | 1                 | 1                 | 1                | 1                | 1               |                |  |  |   |
| 355 | <i>Heliophorus tamu</i> (Kollar, [1844])               | Lycaenidae | 0               | 0               | 0               | 0                | 0                | 0                | 0                | 0                | 0                 | 0                 | 0                 | 1                 | 0                 | 0                 | 0                 | 0                 | 0                 | 0                 | 0                 | 0                | 0                | 0               |                |  |  |   |
| 356 | <i>Heliophorus yunmani</i> D'Abrera, 1977              | Lycaenidae | 0               | 0               | 0               | 0                | 0                | 0                | 0                | 0                | 0                 | 0                 | 0                 | 0                 | 0                 | 0                 | 0                 | 0                 | 0                 | 0                 | 0                 | 0                | 0                | 1               |                |  |  |   |
| 357 | <i>Heliophorus epicles</i> (Godart, [1824])            | Lycaenidae | 1               | 1               | 1               | 1                | 1                | 1                | 1                | 1                | 0                 | 0                 | 0                 | 0                 | 0                 | 0                 | 0                 | 0                 | 0                 | 0                 | 0                 | 0                | 0                | 0               |                |  |  |   |
| 358 | <i>Heliophorus ila</i> (de Nicéville & Martin, [1896]) | Lycaenidae | 1               | 1               | 1               | 1                | 1                | 1                | 1                | 1                | 0                 | 0                 | 0                 | 0                 | 0                 | 0                 | 0                 | 0                 | 0                 | 0                 | 0                 | 1                | 1                | 0               |                |  |  |   |
| 359 | <i>Heliophorus indicus</i> (Fruhstorfer, 1908)         | Lycaenidae | 0               | 0               | 1               | 0                | 0                | 0                | 1                | 1                | 0                 | 0                 | 0                 | 0                 | 0                 | 0                 | 0                 | 0                 | 0                 | 0                 | 0                 | 0                | 0                | 0               |                |  |  |   |

| No. | Pollinating butterfly species                     | Family     | I               |                 |                 | II               |                  |                  |                  |                  | III               |                   |                   |                   |                   |                   |                   |                   |                   |                   |                   |                  |                  | IV              |  | V              |
|-----|---------------------------------------------------|------------|-----------------|-----------------|-----------------|------------------|------------------|------------------|------------------|------------------|-------------------|-------------------|-------------------|-------------------|-------------------|-------------------|-------------------|-------------------|-------------------|-------------------|-------------------|------------------|------------------|-----------------|--|----------------|
|     |                                                   |            | I <sub>A</sub>  |                 | I <sub>B</sub>  | II <sub>A</sub>  |                  |                  | II <sub>B</sub>  |                  | III <sub>A</sub>  |                   |                   |                   | III <sub>B</sub>  |                   |                   |                   |                   |                   |                   |                  |                  | IV <sub>A</sub> |  | V <sub>A</sub> |
|     |                                                   |            | I <sub>A1</sub> | I <sub>A2</sub> | I <sub>B1</sub> | II <sub>A1</sub> | II <sub>A2</sub> | II <sub>A3</sub> | II <sub>B1</sub> | II <sub>B2</sub> | III <sub>A1</sub> | III <sub>A2</sub> | III <sub>A3</sub> | III <sub>A4</sub> | III <sub>B1</sub> | III <sub>B2</sub> | III <sub>B3</sub> | III <sub>B4</sub> | III <sub>B5</sub> | III <sub>B6</sub> | III <sub>B7</sub> | IV <sub>A1</sub> | IV <sub>A2</sub> | V <sub>A1</sub> |  |                |
| 360 | <i>Heliophorus kohimensis</i> (Tytler, 1912)      | Lycaenidae | 0               | 0               | 1               | 0                | 0                | 0                | 1                | 1                | 0                 | 0                 | 0                 | 0                 | 0                 | 0                 | 0                 | 0                 | 0                 | 0                 | 0                 | 0                | 0                | 0               |  |                |
| 361 | <i>Niphanda asialis</i> (de Nicéville, 1895)      | Lycaenidae | 1               | 1               | 0               | 0                | 0                | 0                | 0                | 0                | 0                 | 0                 | 0                 | 0                 | 0                 | 0                 | 0                 | 0                 | 0                 | 0                 | 0                 | 0                | 0                | 0               |  |                |
| 362 | <i>Anthene emolus</i> (Godart, [1824])            | Lycaenidae | 1               | 1               | 1               | 1                | 1                | 1                | 1                | 1                | 0                 | 0                 | 0                 | 0                 | 0                 | 0                 | 0                 | 0                 | 0                 | 0                 | 0                 | 0                | 0                | 0               |  |                |
| 363 | <i>Anthene lycaenina</i> (R. Felder, 1868)        | Lycaenidae | 1               | 1               | 0               | 1                | 1                | 1                | 0                | 0                | 0                 | 0                 | 0                 | 0                 | 0                 | 0                 | 0                 | 0                 | 0                 | 0                 | 0                 | 0                | 0                | 0               |  |                |
| 364 | <i>Orthomiela</i> sp.                             | Lycaenidae | 0               | 0               | 0               | 0                | 0                | 0                | 0                | 0                | 0                 | 0                 | 0                 | 0                 | 0                 | 1                 | 1                 | 0                 | 0                 | 1                 | 1                 | 0                | 0                | 1               |  |                |
| 365 | <i>Petrelaea dana</i> (de Nicéville, 1884)        | Lycaenidae | 1               | 0               | 0               | 0                | 0                | 0                | 0                | 0                | 0                 | 0                 | 0                 | 0                 | 0                 | 0                 | 0                 | 0                 | 0                 | 0                 | 0                 | 0                | 0                | 0               |  |                |
| 366 | <i>Nacaduba beroe</i> (C. & R. Felder, 1865)      | Lycaenidae | 1               | 1               | 1               | 0                | 0                | 0                | 0                | 0                | 0                 | 0                 | 0                 | 0                 | 0                 | 0                 | 0                 | 0                 | 0                 | 0                 | 0                 | 0                | 0                | 0               |  |                |
| 367 | <i>Nacaduba kurava</i> (Moore, [1858])            | Lycaenidae | 1               | 1               | 1               | 1                | 1                | 1                | 1                | 1                | 0                 | 0                 | 0                 | 0                 | 0                 | 0                 | 0                 | 0                 | 0                 | 0                 | 0                 | 0                | 0                | 0               |  |                |
| 368 | <i>Nacaduba pactolus</i> (C. Felder, 1860)        | Lycaenidae | 1               | 1               | 1               | 0                | 0                | 0                | 0                | 0                | 0                 | 0                 | 0                 | 0                 | 0                 | 0                 | 0                 | 0                 | 0                 | 0                 | 0                 | 0                | 0                | 0               |  |                |
| 369 | <i>Nacaduba hermus</i> (C. Felder, 1860)          | Lycaenidae | 1               | 1               | 1               | 0                | 0                | 0                | 0                | 0                | 0                 | 0                 | 0                 | 0                 | 0                 | 0                 | 0                 | 0                 | 0                 | 0                 | 0                 | 0                | 0                | 0               |  |                |
| 370 | <i>Nacaduba berenice</i> (Herrich-Schäffer, 1869) | Lycaenidae | 1               | 1               | 1               | 0                | 0                | 0                | 0                | 0                | 0                 | 0                 | 0                 | 0                 | 0                 | 0                 | 0                 | 0                 | 0                 | 0                 | 0                 | 0                | 0                | 0               |  |                |
| 371 | <i>Ionolyce helicon</i> (C. Felder, 1860)         | Lycaenidae | 1               | 1               | 1               | 0                | 0                | 0                | 0                | 0                | 0                 | 0                 | 0                 | 0                 | 0                 | 0                 | 0                 | 0                 | 0                 | 0                 | 0                 | 0                | 0                | 0               |  |                |
| 372 | <i>Prosotas nora</i> (C. Felder, 1860)            | Lycaenidae | 1               | 1               | 1               | 1                | 1                | 1                | 1                | 1                | 0                 | 0                 | 0                 | 0                 | 0                 | 0                 | 0                 | 0                 | 0                 | 0                 | 0                 | 0                | 0                | 0               |  |                |
| 373 | <i>Prosotas aluta</i> (Druce, 1873)               | Lycaenidae | 1               | 0               | 0               | 0                | 0                | 0                | 0                | 0                | 0                 | 0                 | 0                 | 0                 | 0                 | 0                 | 0                 | 0                 | 0                 | 0                 | 0                 | 0                | 0                | 0               |  |                |
| 374 | <i>Prosotas lutea</i> (Martin, 1895)              | Lycaenidae | 1               | 0               | 0               | 0                | 0                | 0                | 0                | 0                | 0                 | 0                 | 0                 | 0                 | 0                 | 0                 | 0                 | 0                 | 0                 | 0                 | 0                 | 0                | 0                | 0               |  |                |
| 375 | <i>Prosotas dubiosa</i> (Semper, 1879)            | Lycaenidae | 1               | 1               | 1               | 0                | 0                | 0                | 0                | 0                | 0                 | 0                 | 0                 | 0                 | 0                 | 0                 | 1                 | 0                 | 0                 | 0                 | 0                 | 0                | 0                | 0               |  |                |
| 376 | <i>Prosotas bhutea</i> (de Nicéville, 1884)       | Lycaenidae | 1               | 0               | 0               | 0                | 0                | 0                | 0                | 0                | 0                 | 0                 | 0                 | 0                 | 0                 | 0                 | 0                 | 0                 | 0                 | 0                 | 0                 | 0                | 0                | 0               |  |                |
| 377 | <i>Prosotas pia</i> Toxopeus, 1929                | Lycaenidae | 1               | 0               | 0               | 0                | 0                | 0                | 0                | 0                | 0                 | 0                 | 0                 | 0                 | 0                 | 0                 | 0                 | 0                 | 0                 | 0                 | 0                 | 0                | 0                | 0               |  |                |
| 378 | <i>Caleta roxus</i> (Godart, [1824])              | Lycaenidae | 1               | 1               | 1               | 1                | 1                | 1                | 1                | 1                | 0                 | 0                 | 0                 | 0                 | 0                 | 0                 | 0                 | 0                 | 0                 | 0                 | 0                 | 0                | 0                | 0               |  |                |
| 379 | <i>Caleta elna</i> (Hewitson, [1876])             | Lycaenidae | 1               | 1               | 1               | 1                | 1                | 1                | 1                | 1                | 0                 | 0                 | 0                 | 0                 | 0                 | 0                 | 0                 | 0                 | 0                 | 0                 | 0                 | 0                | 0                | 0               |  |                |
| 380 | <i>Caleta decidia</i> (Hewitson, [1876])          | Lycaenidae | 1               | 1               | 0               | 0                | 0                | 0                | 0                | 0                | 0                 | 0                 | 0                 | 0                 | 0                 | 0                 | 0                 | 0                 | 0                 | 0                 | 0                 | 0                | 0                | 0               |  |                |
| 381 | <i>Jamides bochus</i> (Stoll, [1782])             | Lycaenidae | 1               | 1               | 1               | 1                | 1                | 1                | 1                | 1                | 1                 | 1                 | 1                 | 1                 | 1                 | 1                 | 1                 | 1                 | 1                 | 1                 | 1                 | 1                | 1                | 1               |  |                |
| 382 | <i>Jamides celeno</i> (Cramer, [1775])            | Lycaenidae | 1               | 1               | 1               | 1                | 1                | 1                | 1                | 1                | 0                 | 0                 | 0                 | 0                 | 0                 | 0                 | 0                 | 0                 | 0                 | 0                 | 0                 | 0                | 0                | 0               |  |                |
| 383 | <i>Jamides alecto</i> (C. Felder, 1860)           | Lycaenidae | 1               | 1               | 1               | 0                | 0                | 0                | 0                | 0                | 0                 | 0                 | 0                 | 0                 | 0                 | 0                 | 0                 | 0                 | 0                 | 0                 | 0                 | 0                | 0                | 0               |  |                |
| 384 | <i>Catochrysops strabo</i> (Fabricius, 1793)      | Lycaenidae | 1               | 1               | 1               | 1                | 1                | 1                | 1                | 1                | 0                 | 0                 | 0                 | 0                 | 0                 | 0                 | 0                 | 0                 | 0                 | 0                 | 0                 | 0                | 0                | 0               |  |                |
| 385 | <i>Lampides boeticus</i> (Linnaeus, 1767)         | Lycaenidae | 1               | 1               | 1               | 1                | 1                | 1                | 1                | 1                | 1                 | 1                 | 1                 | 1                 | 1                 | 1                 | 1                 | 1                 | 1                 | 1                 | 1                 | 1                | 1                | 1               |  |                |
| 386 | <i>Syntarucus plinius</i> (Fabricius, 1793)       | Lycaenidae | 1               | 1               | 1               | 1                | 1                | 1                | 1                | 1                | 1                 | 1                 | 1                 | 1                 | 1                 | 1                 | 1                 | 1                 | 1                 | 1                 | 1                 | 1                | 1                | 1               |  |                |
| 387 | <i>Castalius rosimon</i> (Fabricius, 1775)        | Lycaenidae | 1               | 1               | 1               | 1                | 1                | 1                | 1                | 1                | 0                 | 0                 | 0                 | 0                 | 0                 | 0                 | 0                 | 0                 | 0                 | 0                 | 0                 | 0                | 0                | 0               |  |                |
| 388 | <i>Zizeeria karsandra</i> (Moore, 1865)           | Lycaenidae | 1               | 1               | 0               | 0                | 0                | 0                | 0                | 0                | 0                 | 0                 | 0                 | 0                 | 0                 | 0                 | 0                 | 0                 | 0                 | 0                 | 0                 | 0                | 0                | 0               |  |                |
| 389 | <i>Zizina otis</i> (Fabricius, 1787)              | Lycaenidae | 1               | 1               | 1               | 1                | 1                | 1                | 1                | 1                | 0                 | 0                 | 0                 | 0                 | 0                 | 0                 | 0                 | 0                 | 0                 | 0                 | 0                 | 0                | 0                | 0               |  |                |
| 390 | <i>Zizina emelina</i> (de L'Orza, 1869)           | Lycaenidae | 0               | 0               | 0               | 0                | 0                | 0                | 0                | 0                | 1                 | 1                 | 1                 | 1                 | 1                 | 1                 | 1                 | 1                 | 1                 | 1                 | 1                 | 1                | 1                | 1               |  |                |
| 391 | <i>Pseudozizeeria maha</i> (Kollar, [1844])       | Lycaenidae | 1               | 1               | 1               | 1                | 1                | 1                | 1                | 1                | 1                 | 1                 | 1                 | 1                 | 1                 | 1                 | 1                 | 1                 | 1                 | 1                 | 1                 | 1                | 1                | 1               |  |                |
| 392 | <i>Famegana alsulus</i> (Herrich-Schäffer, 1869)  | Lycaenidae | 0               | 0               | 1               | 0                | 0                | 0                | 1                | 0                | 0                 | 0                 | 0                 | 0                 | 0                 | 0                 | 0                 | 0                 | 0                 | 0                 | 0                 | 0                | 0                | 0               |  |                |
| 393 | <i>Zizula hylax</i> (Fabricius, 1775)             | Lycaenidae | 1               | 1               | 0               | 0                | 0                | 0                | 0                | 0                | 0                 | 0                 | 0                 | 0                 | 0                 | 0                 | 0                 | 0                 | 0                 | 0                 | 0                 | 0                | 0                | 0               |  |                |
| 394 | <i>Everes argiades</i> (Pallas, 1771)             | Lycaenidae | 1               | 1               | 1               | 1                | 1                | 1                | 1                | 1                | 1                 | 1                 | 1                 | 1                 | 1                 | 1                 | 1                 | 1                 | 1                 | 1                 | 1                 | 1                | 1                | 1               |  |                |
| 395 | <i>Everes lacturnus</i> (Godart, [1824])          | Lycaenidae | 1               | 1               | 1               | 1                | 1                | 1                | 1                | 1                | 1                 | 1                 | 0                 | 0                 | 0                 | 1                 | 0                 | 0                 | 0                 | 0                 | 0                 | 0                | 0                | 0               |  |                |
| 396 | <i>Tongeia filicaudis</i> (Pryer, 1877)           | Lycaenidae | 0               | 0               | 0               | 0                | 0                | 0                | 0                | 0                | 0                 | 0                 | 0                 | 0                 | 0                 | 0                 | 0                 | 0                 | 0                 | 0                 | 0                 | 1                | 1                | 0               |  |                |
| 397 | <i>Tongeia dongchuanensis</i> Huang & Chen, 2006  | Lycaenidae | 0               | 0               | 0               | 0                | 0                | 0                | 0                | 0                | 0                 | 0                 | 0                 | 0                 | 0                 | 0                 | 0                 | 0                 | 0                 | 1                 | 1                 | 0                | 0                | 0               |  |                |
| 398 | <i>Tongeia potanini</i> (Alphéraky, 1889)         | Lycaenidae | 1               | 1               | 1               | 1                | 1                | 1                | 1                | 1                | 0                 | 0                 | 0                 | 0                 | 1                 | 0                 | 1                 | 0                 | 0                 | 0                 | 0                 | 0                | 0                | 0               |  |                |
| 399 | <i>Tongeia ion</i> (Leech, 1891)                  | Lycaenidae | 1               | 1               | 1               | 1                | 1                | 1                | 1                | 1                | 1                 | 1                 | 1                 | 1                 | 1                 | 1                 | 1                 | 1                 | 1                 | 1                 | 1                 | 1                | 1                | 1               |  |                |

| No. | Pollinating butterfly species                         | Family      | I               |                 |                 | II               |                  |                  |                  | III              |                   |                   |                   |                   |                   |                   |                   |                   |                   |                   |                   | IV               |                  | V               |
|-----|-------------------------------------------------------|-------------|-----------------|-----------------|-----------------|------------------|------------------|------------------|------------------|------------------|-------------------|-------------------|-------------------|-------------------|-------------------|-------------------|-------------------|-------------------|-------------------|-------------------|-------------------|------------------|------------------|-----------------|
|     |                                                       |             | I <sub>A</sub>  |                 | I <sub>B</sub>  | II <sub>A</sub>  |                  |                  | II <sub>B</sub>  |                  | III <sub>A</sub>  |                   |                   |                   | III <sub>B</sub>  |                   |                   |                   |                   |                   |                   | IV <sub>A</sub>  |                  | V <sub>A</sub>  |
|     |                                                       |             | I <sub>A1</sub> | I <sub>A2</sub> | I <sub>B1</sub> | II <sub>A1</sub> | II <sub>A2</sub> | II <sub>A3</sub> | II <sub>B1</sub> | II <sub>B2</sub> | III <sub>A1</sub> | III <sub>A2</sub> | III <sub>A3</sub> | III <sub>A4</sub> | III <sub>B1</sub> | III <sub>B2</sub> | III <sub>B3</sub> | III <sub>B4</sub> | III <sub>B5</sub> | III <sub>B6</sub> | III <sub>B7</sub> | IV <sub>A1</sub> | IV <sub>A2</sub> | V <sub>A1</sub> |
| 400 | <i>Tongeia amplifascia</i> Huang, 2001                | Lycaenidae  | 0               | 0               | 0               | 0                | 0                | 0                | 0                | 0                | 0                 | 0                 | 0                 | 0                 | 0                 | 0                 | 0                 | 0                 | 0                 | 0                 | 0                 | 0                | 0                | 1               |
| 401 | <i>Pithecopus corvus</i> Fruhstorfer, [1919]          | Lycaenidae  | 1               | 1               | 1               | 1                | 1                | 1                | 1                | 1                | 0                 | 1                 | 0                 | 0                 | 0                 | 0                 | 0                 | 0                 | 0                 | 0                 | 0                 | 0                | 0                | 0               |
| 402 | <i>Neopithecopus zalmora</i> (Butler, 1870)           | Lycaenidae  | 1               | 1               | 1               | 1                | 1                | 1                | 1                | 1                | 0                 | 1                 | 0                 | 0                 | 0                 | 0                 | 0                 | 0                 | 0                 | 0                 | 0                 | 0                | 0                | 0               |
| 403 | <i>Megisba malaya</i> (Horsfield, [1828])             | Lycaenidae  | 1               | 1               | 1               | 1                | 1                | 1                | 1                | 1                | 0                 | 1                 | 0                 | 0                 | 0                 | 0                 | 0                 | 0                 | 0                 | 0                 | 0                 | 0                | 0                | 0               |
| 404 | <i>Celastrina argiolus</i> (Linnaeus, 1758)           | Lycaenidae  | 1               | 1               | 1               | 1                | 1                | 1                | 1                | 1                | 1                 | 1                 | 1                 | 1                 | 1                 | 1                 | 1                 | 1                 | 1                 | 1                 | 1                 | 1                | 1                | 1               |
| 405 | <i>Celastrina lavendularis</i> (Moore, 1877)          | Lycaenidae  | 1               | 1               | 1               | 1                | 1                | 1                | 1                | 1                | 0                 | 0                 | 0                 | 0                 | 0                 | 0                 | 0                 | 0                 | 0                 | 0                 | 0                 | 0                | 0                | 0               |
| 406 | <i>Celastrina oreas</i> (Leech, [1893])               | Lycaenidae  | 1               | 1               | 1               | 1                | 1                | 1                | 1                | 1                | 1                 | 1                 | 1                 | 1                 | 1                 | 1                 | 1                 | 1                 | 1                 | 1                 | 1                 | 1                | 1                | 1               |
| 407 | <i>Celastrina morsheadi</i> (Evans, 1915)             | Lycaenidae  | 0               | 0               | 0               | 0                | 0                | 0                | 0                | 0                | 0                 | 0                 | 0                 | 0                 | 0                 | 0                 | 0                 | 0                 | 0                 | 0                 | 0                 | 0                | 0                | 1               |
| 408 | <i>Celastrina huegelii</i> (Moore, 1882)              | Lycaenidae  | 0               | 0               | 0               | 0                | 0                | 0                | 0                | 0                | 0                 | 0                 | 0                 | 0                 | 0                 | 0                 | 0                 | 0                 | 0                 | 1                 | 1                 | 0                | 0                | 1               |
| 409 | <i>Acytolepis puspa</i> (Horsfield, [1828])           | Lycaenidae  | 1               | 1               | 1               | 1                | 1                | 1                | 1                | 1                | 1                 | 1                 | 1                 | 1                 | 1                 | 1                 | 1                 | 1                 | 1                 | 1                 | 1                 | 0                | 0                | 0               |
| 410 | <i>Celatoxia marginata</i> (de Nicéville, [1884])     | Lycaenidae  | 1               | 1               | 1               | 1                | 1                | 1                | 1                | 1                | 1                 | 1                 | 1                 | 1                 | 1                 | 1                 | 1                 | 1                 | 1                 | 1                 | 1                 | 0                | 0                | 0               |
| 411 | <i>Monodontides musina</i> (von Snellen, 1892)        | Lycaenidae  | 1               | 1               | 1               | 1                | 1                | 1                | 1                | 1                | 1                 | 1                 | 0                 | 0                 | 1                 | 0                 | 1                 | 0                 | 0                 | 0                 | 0                 | 0                | 0                | 0               |
| 412 | <i>Udara dilectus</i> (Moore, 1879)                   | Lycaenidae  | 1               | 1               | 1               | 1                | 1                | 1                | 1                | 1                | 1                 | 1                 | 1                 | 1                 | 1                 | 1                 | 1                 | 1                 | 1                 | 1                 | 1                 | 1                | 1                | 1               |
| 413 | <i>Udara albocaerulea</i> (Moore, 1879)               | Lycaenidae  | 1               | 1               | 1               | 1                | 1                | 1                | 1                | 1                | 1                 | 1                 | 1                 | 1                 | 1                 | 1                 | 1                 | 1                 | 1                 | 1                 | 1                 | 1                | 1                | 0               |
| 414 | <i>Lestranicus transpectus</i> (Moore, 1879)          | Lycaenidae  | 1               | 1               | 0               | 0                | 1                | 0                | 0                | 0                | 0                 | 1                 | 0                 | 0                 | 0                 | 0                 | 0                 | 0                 | 0                 | 0                 | 0                 | 0                | 0                | 0               |
| 415 | <i>Caerulea coeligena</i> (Oberthür, 1876)            | Lycaenidae  | 0               | 0               | 0               | 0                | 0                | 0                | 0                | 0                | 0                 | 0                 | 0                 | 0                 | 0                 | 0                 | 1                 | 1                 | 0                 | 1                 | 1                 | 1                | 1                | 1               |
| 416 | <i>Caerulea coelestis</i> (Alphéraky, 1879)           | Lycaenidae  | 0               | 0               | 0               | 0                | 0                | 0                | 0                | 0                | 0                 | 0                 | 0                 | 0                 | 0                 | 0                 | 0                 | 0                 | 0                 | 1                 | 1                 | 0                | 0                | 1               |
| 417 | <i>Phengaris atroguttata</i> (Oberthür, 1876)         | Lycaenidae  | 0               | 0               | 0               | 0                | 0                | 0                | 0                | 0                | 0                 | 0                 | 0                 | 0                 | 0                 | 0                 | 1                 | 1                 | 0                 | 1                 | 1                 | 1                | 1                | 1               |
| 418 | <i>Phengaris xiushani</i> Wang & Settele, 2010        | Lycaenidae  | 0               | 0               | 0               | 0                | 0                | 0                | 0                | 0                | 0                 | 1                 | 0                 | 0                 | 0                 | 0                 | 0                 | 0                 | 0                 | 0                 | 0                 | 0                | 0                | 0               |
| 419 | <i>Albulina orbitulus</i> (Prunner, 1798)             | Lycaenidae  | 0               | 0               | 0               | 0                | 0                | 0                | 0                | 0                | 0                 | 0                 | 0                 | 0                 | 0                 | 0                 | 0                 | 0                 | 0                 | 1                 | 1                 | 0                | 0                | 1               |
| 420 | <i>Chilades lajus</i> (Stoll, [1780])                 | Lycaenidae  | 1               | 1               | 0               | 0                | 0                | 0                | 0                | 0                | 0                 | 0                 | 0                 | 0                 | 0                 | 0                 | 0                 | 0                 | 0                 | 0                 | 0                 | 0                | 0                | 0               |
| 421 | <i>Chilades padava</i> (Horsfield, [1829])            | Lycaenidae  | 1               | 1               | 1               | 1                | 1                | 1                | 1                | 1                | 1                 | 1                 | 1                 | 1                 | 1                 | 1                 | 1                 | 1                 | 1                 | 1                 | 1                 | 1                | 1                | 0               |
| 422 | <i>Freyeria trochylus</i> (Freyer, 1845)              | Lycaenidae  | 1               | 1               | 1               | 1                | 1                | 1                | 1                | 1                | 0                 | 0                 | 0                 | 0                 | 0                 | 0                 | 0                 | 0                 | 0                 | 0                 | 0                 | 0                | 0                | 0               |
| 423 | <i>Burara vasutana</i> (Moore, [1866])                | Hesperiidae | 0               | 0               | 0               | 0                | 0                | 0                | 0                | 0                | 0                 | 0                 | 0                 | 1                 | 0                 | 0                 | 0                 | 0                 | 0                 | 0                 | 0                 | 0                | 0                | 0               |
| 424 | <i>Burara harisa</i> (Moore, [1866])                  | Hesperiidae | 0               | 0               | 0               | 0                | 0                | 0                | 1                | 0                | 0                 | 0                 | 0                 | 0                 | 0                 | 0                 | 0                 | 0                 | 0                 | 0                 | 0                 | 0                | 0                | 0               |
| 425 | <i>Burara oedipodea</i> (Swainson, 1820)              | Hesperiidae | 0               | 0               | 0               | 0                | 0                | 0                | 1                | 0                | 0                 | 0                 | 0                 | 0                 | 0                 | 0                 | 0                 | 0                 | 0                 | 0                 | 0                 | 0                | 0                | 0               |
| 426 | <i>Badamia exclamationis</i> (Fabricius, 1775)        | Hesperiidae | 0               | 0               | 0               | 1                | 0                | 0                | 0                | 0                | 0                 | 0                 | 0                 | 0                 | 0                 | 0                 | 0                 | 0                 | 0                 | 0                 | 0                 | 0                | 0                | 0               |
| 427 | <i>Hasora anura</i> de Nicéville, 1889                | Hesperiidae | 0               | 0               | 0               | 0                | 0                | 0                | 0                | 0                | 0                 | 1                 | 0                 | 0                 | 1                 | 0                 | 0                 | 0                 | 0                 | 0                 | 0                 | 0                | 0                | 0               |
| 428 | <i>Hasora schoenherr</i> (Latreille, [1824])          | Hesperiidae | 1               | 0               | 0               | 0                | 0                | 0                | 0                | 0                | 0                 | 0                 | 0                 | 0                 | 0                 | 0                 | 0                 | 0                 | 0                 | 0                 | 0                 | 0                | 0                | 0               |
| 429 | <i>Hasora vitta</i> (Butler, 1870)                    | Hesperiidae | 1               | 1               | 0               | 0                | 0                | 0                | 1                | 0                | 0                 | 0                 | 0                 | 0                 | 0                 | 0                 | 0                 | 0                 | 0                 | 0                 | 0                 | 0                | 0                | 0               |
| 430 | <i>Hasora chromus</i> (Cramer, [1780])                | Hesperiidae | 1               | 0               | 0               | 0                | 0                | 0                | 0                | 0                | 0                 | 0                 | 0                 | 0                 | 0                 | 0                 | 0                 | 0                 | 0                 | 0                 | 0                 | 0                | 0                | 0               |
| 431 | <i>Hasora badra</i> (Moore, [1856])                   | Hesperiidae | 0               | 0               | 0               | 0                | 0                | 0                | 1                | 0                | 0                 | 0                 | 0                 | 0                 | 0                 | 0                 | 0                 | 0                 | 0                 | 0                 | 0                 | 0                | 0                | 0               |
| 432 | <i>Hasora taminatus</i> (Hübner, 1818)                | Hesperiidae | 1               | 0               | 0               | 0                | 0                | 0                | 0                | 0                | 0                 | 0                 | 0                 | 0                 | 0                 | 0                 | 0                 | 0                 | 0                 | 0                 | 0                 | 0                | 0                | 0               |
| 433 | <i>Choaspes benjaminii</i> (Guérin-Ménéville, 1843)   | Hesperiidae | 0               | 0               | 0               | 0                | 0                | 0                | 0                | 0                | 0                 | 0                 | 0                 | 1                 | 0                 | 0                 | 0                 | 0                 | 0                 | 0                 | 0                 | 0                | 0                | 0               |
| 434 | <i>Choaspes xanthopogon</i> (Kollar, [1844])          | Hesperiidae | 0               | 0               | 0               | 0                | 0                | 0                | 0                | 0                | 0                 | 0                 | 0                 | 0                 | 1                 | 0                 | 0                 | 0                 | 0                 | 0                 | 0                 | 0                | 0                | 0               |
| 435 | <i>Choaspes hemixanthus</i> Rothschild & Jordan, 1903 | Hesperiidae | 0               | 0               | 0               | 0                | 0                | 0                | 0                | 0                | 0                 | 0                 | 0                 | 0                 | 0                 | 0                 | 0                 | 0                 | 0                 | 0                 | 0                 | 1                | 0                | 0               |
| 436 | <i>Choaspes stigmata</i> Evans, 1932                  | Hesperiidae | 1               | 0               | 0               | 0                | 0                | 0                | 0                | 0                | 0                 | 0                 | 0                 | 0                 | 0                 | 0                 | 0                 | 0                 | 0                 | 0                 | 0                 | 0                | 0                | 0               |
| 437 | <i>Choaspes subcaudatus</i> (C. & R. Felder, 1867)    | Hesperiidae | 1               | 0               | 0               | 0                | 0                | 0                | 0                | 0                | 0                 | 0                 | 0                 | 0                 | 0                 | 0                 | 0                 | 0                 | 0                 | 0                 | 0                 | 0                | 0                | 0               |
| 438 | <i>Lobocla bifasciata</i> (Bremer & Grey, 1853)       | Hesperiidae | 0               | 0               | 0               | 0                | 0                | 0                | 0                | 0                | 0                 | 0                 | 1                 | 1                 | 0                 | 1                 | 0                 | 0                 | 0                 | 1                 | 0                 | 0                | 0                | 0               |
| 439 | <i>Lobocla liliana</i> (Atkinson, 1871)               | Hesperiidae | 0               | 0               | 0               | 0                | 0                | 0                | 0                | 0                | 0                 | 1                 | 0                 | 1                 | 0                 | 0                 | 0                 | 0                 | 0                 | 0                 | 0                 | 0                | 0                | 0               |

| No. | Pollinating butterfly species                      | Family      | I               |                 |                 | II               |                  |                  |                  |                  | III               |                   |                   |                   |                   |                   |                   |                   |                   |                   |                   |                  |                  |                 | IV              |  |                | V |
|-----|----------------------------------------------------|-------------|-----------------|-----------------|-----------------|------------------|------------------|------------------|------------------|------------------|-------------------|-------------------|-------------------|-------------------|-------------------|-------------------|-------------------|-------------------|-------------------|-------------------|-------------------|------------------|------------------|-----------------|-----------------|--|----------------|---|
|     |                                                    |             | I <sub>A</sub>  |                 | I <sub>B</sub>  | II <sub>A</sub>  |                  |                  | II <sub>B</sub>  |                  | III <sub>A</sub>  |                   |                   |                   | III <sub>B</sub>  |                   |                   |                   |                   |                   |                   |                  |                  |                 | IV <sub>A</sub> |  | V <sub>A</sub> |   |
|     |                                                    |             | I <sub>A1</sub> | I <sub>A2</sub> | I <sub>B1</sub> | II <sub>A1</sub> | II <sub>A2</sub> | II <sub>A3</sub> | II <sub>B1</sub> | II <sub>B2</sub> | III <sub>A1</sub> | III <sub>A2</sub> | III <sub>A3</sub> | III <sub>A4</sub> | III <sub>B1</sub> | III <sub>B2</sub> | III <sub>B3</sub> | III <sub>B4</sub> | III <sub>B5</sub> | III <sub>B6</sub> | III <sub>B7</sub> | IV <sub>A1</sub> | IV <sub>A2</sub> | V <sub>A1</sub> |                 |  |                |   |
| 440 | <i>Lobocla germana</i> (Oberthür, 1886)            | Hesperiidae | 0               | 0               | 0               | 0                | 0                | 0                | 0                | 0                | 0                 | 0                 | 0                 | 1                 | 0                 | 0                 | 0                 | 0                 | 0                 | 1                 | 0                 | 0                | 0                | 0               | 1               |  |                |   |
| 441 | <i>Lobocla proxima</i> (Leech, 1891)               | Hesperiidae | 0               | 0               | 0               | 0                | 0                | 0                | 0                | 0                | 0                 | 0                 | 0                 | 0                 | 0                 | 0                 | 0                 | 0                 | 0                 | 1                 | 0                 | 0                | 0                | 0               | 1               |  |                |   |
| 442 | <i>Lobocla simplex</i> (Leech, 1891)               | Hesperiidae | 0               | 0               | 0               | 0                | 0                | 0                | 0                | 0                | 0                 | 0                 | 0                 | 1                 | 0                 | 0                 | 0                 | 0                 | 0                 | 1                 | 0                 | 0                | 0                | 0               | 0               |  |                |   |
| 443 | <i>Abraximorpha davidii</i> (Mabille, 1876)        | Hesperiidae | 0               | 0               | 0               | 0                | 0                | 0                | 0                | 0                | 0                 | 0                 | 0                 | 0                 | 0                 | 0                 | 0                 | 0                 | 0                 | 0                 | 0                 | 1                | 0                | 0               | 0               |  |                |   |
| 444 | <i>Caprona alida</i> (de Nicéville, 1891)          | Hesperiidae | 0               | 0               | 0               | 0                | 0                | 0                | 1                | 0                | 0                 | 0                 | 0                 | 0                 | 0                 | 0                 | 0                 | 0                 | 0                 | 0                 | 0                 | 0                | 0                | 0               | 0               |  |                |   |
| 445 | <i>Odontoptilum angulata</i> (Felder, 1862)        | Hesperiidae | 1               | 0               | 0               | 0                | 1                | 0                | 1                | 0                | 0                 | 0                 | 0                 | 0                 | 0                 | 0                 | 1                 | 0                 | 0                 | 0                 | 0                 | 0                | 0                | 0               | 0               |  |                |   |
| 446 | <i>Seseria dohertyi</i> (Watson,1893)              | Hesperiidae | 1               | 0               | 0               | 0                | 0                | 0                | 0                | 0                | 0                 | 0                 | 0                 | 0                 | 0                 | 0                 | 0                 | 0                 | 0                 | 0                 | 0                 | 0                | 0                | 0               | 0               |  |                |   |
| 447 | <i>Sarangesa dasahara</i> (Moore, [1866])          | Hesperiidae | 0               | 0               | 0               | 0                | 0                | 0                | 1                | 0                | 0                 | 0                 | 0                 | 0                 | 0                 | 0                 | 0                 | 0                 | 0                 | 0                 | 0                 | 0                | 0                | 0               | 0               |  |                |   |
| 448 | <i>Celaenorrhinus vietnamicus</i> Devyatkin, 2000  | Hesperiidae | 1               | 0               | 0               | 0                | 0                | 0                | 0                | 0                | 0                 | 0                 | 0                 | 0                 | 0                 | 0                 | 0                 | 0                 | 0                 | 0                 | 0                 | 0                | 0                | 0               | 0               |  |                |   |
| 449 | <i>Celaenorrhinus consanguinea</i> Leech, 1891     | Hesperiidae | 0               | 0               | 0               | 0                | 0                | 0                | 0                | 0                | 0                 | 0                 | 0                 | 1                 | 1                 | 0                 | 0                 | 0                 | 0                 | 0                 | 0                 | 0                | 0                | 0               | 0               |  |                |   |
| 450 | <i>Celaenorrhinus leucocera</i> (Kollar, [1844])   | Hesperiidae | 1               | 0               | 0               | 0                | 0                | 0                | 1                | 0                | 0                 | 0                 | 0                 | 0                 | 0                 | 0                 | 0                 | 0                 | 0                 | 0                 | 0                 | 0                | 0                | 0               | 0               |  |                |   |
| 451 | <i>Celaenorrhinus victor</i> Devyatkin, 2003       | Hesperiidae | 0               | 0               | 0               | 0                | 0                | 0                | 0                | 0                | 0                 | 0                 | 0                 | 1                 | 0                 | 0                 | 0                 | 0                 | 0                 | 0                 | 0                 | 0                | 0                | 0               | 0               |  |                |   |
| 452 | <i>Celaenorrhinus tibetana</i> (Mabille, 1876)     | Hesperiidae | 0               | 0               | 0               | 0                | 0                | 0                | 0                | 0                | 0                 | 0                 | 0                 | 1                 | 1                 | 0                 | 0                 | 0                 | 0                 | 1                 | 0                 | 0                | 0                | 0               | 0               |  |                |   |
| 453 | <i>Coladenia maeniata</i> Oberthür, 1896           | Hesperiidae | 0               | 0               | 0               | 0                | 0                | 0                | 0                | 0                | 0                 | 0                 | 1                 | 1                 | 0                 | 0                 | 0                 | 0                 | 0                 | 0                 | 0                 | 0                | 0                | 0               | 1               |  |                |   |
| 454 | <i>Coladenia buchananii</i> (de Nicéville, 1889)   | Hesperiidae | 0               | 0               | 0               | 0                | 0                | 0                | 0                | 0                | 0                 | 1                 | 0                 | 1                 | 0                 | 0                 | 0                 | 0                 | 0                 | 0                 | 0                 | 0                | 0                | 0               | 0               |  |                |   |
| 455 | <i>Coladenia uemurai</i> Huang, 2003               | Hesperiidae | 0               | 0               | 0               | 0                | 0                | 0                | 0                | 0                | 0                 | 0                 | 0                 | 1                 | 0                 | 0                 | 0                 | 0                 | 0                 | 0                 | 0                 | 0                | 0                | 0               | 0               |  |                |   |
| 456 | <i>Mooreana trichoneura</i> (C. & R. Felder, 1860) | Hesperiidae | 1               | 0               | 0               | 0                | 0                | 0                | 1                | 0                | 0                 | 0                 | 0                 | 0                 | 0                 | 0                 | 0                 | 0                 | 0                 | 0                 | 0                 | 0                | 0                | 0               | 0               |  |                |   |
| 457 | <i>Daimio tethys</i> (Ménétriés, 1857)             | Hesperiidae | 0               | 0               | 0               | 0                | 0                | 0                | 0                | 0                | 0                 | 0                 | 0                 | 1                 | 1                 | 0                 | 0                 | 0                 | 0                 | 0                 | 0                 | 1                | 0                | 0               | 0               |  |                |   |
| 458 | <i>Gerosis phisara</i> (Moore, 1884)               | Hesperiidae | 1               | 0               | 0               | 0                | 1                | 0                | 0                | 0                | 0                 | 0                 | 0                 | 0                 | 0                 | 0                 | 0                 | 0                 | 0                 | 0                 | 0                 | 0                | 0                | 0               | 0               |  |                |   |
| 459 | <i>Gerosis sinica</i> (C. & R. Felder, 1862)       | Hesperiidae | 0               | 0               | 0               | 0                | 0                | 0                | 0                | 0                | 0                 | 0                 | 0                 | 1                 | 0                 | 0                 | 0                 | 0                 | 0                 | 0                 | 0                 | 0                | 0                | 0               | 0               |  |                |   |
| 460 | <i>Tagiades gana</i> (Moore, 1865)                 | Hesperiidae | 1               | 0               | 1               | 0                | 0                | 0                | 0                | 0                | 0                 | 0                 | 0                 | 0                 | 0                 | 0                 | 0                 | 0                 | 0                 | 0                 | 0                 | 0                | 0                | 0               | 0               |  |                |   |
| 461 | <i>Tagiades litigiosa</i> Möschler, 1878           | Hesperiidae | 0               | 1               | 0               | 0                | 0                | 0                | 1                | 0                | 0                 | 0                 | 0                 | 1                 | 0                 | 0                 | 1                 | 0                 | 0                 | 0                 | 0                 | 0                | 0                | 0               | 0               |  |                |   |
| 462 | <i>Tagiades menaka</i> (Moore, 1865)               | Hesperiidae | 0               | 0               | 0               | 0                | 1                | 0                | 0                | 0                | 0                 | 0                 | 0                 | 0                 | 0                 | 0                 | 0                 | 0                 | 0                 | 0                 | 0                 | 1                | 0                | 0               | 0               |  |                |   |
| 463 | <i>Satarupa gopala</i> Moore, 1865                 | Hesperiidae | 1               | 0               | 0               | 0                | 0                | 0                | 0                | 0                | 0                 | 0                 | 0                 | 0                 | 0                 | 0                 | 0                 | 0                 | 0                 | 0                 | 0                 | 0                | 0                | 0               | 0               |  |                |   |
| 464 | <i>Darpa striata</i> (Druce, 1873)                 | Hesperiidae | 1               | 0               | 0               | 0                | 0                | 0                | 0                | 0                | 0                 | 0                 | 0                 | 0                 | 0                 | 0                 | 0                 | 0                 | 0                 | 0                 | 0                 | 0                | 0                | 0               | 0               |  |                |   |
| 465 | <i>Darpa hanria</i> Moore, [1866]                  | Hesperiidae | 0               | 0               | 0               | 0                | 1                | 0                | 0                | 0                | 0                 | 0                 | 0                 | 0                 | 0                 | 0                 | 0                 | 0                 | 0                 | 0                 | 0                 | 0                | 0                | 0               | 0               |  |                |   |
| 466 | <i>Pseudocoladenia dan</i> (Fabricius, 1787)       | Hesperiidae | 1               | 0               | 0               | 0                | 0                | 0                | 0                | 0                | 0                 | 0                 | 1                 | 0                 | 0                 | 0                 | 0                 | 0                 | 0                 | 0                 | 0                 | 0                | 0                | 0               | 0               |  |                |   |
| 467 | <i>Pseudocoladenia festa</i> (Evans, 1949)         | Hesperiidae | 0               | 0               | 0               | 0                | 0                | 0                | 0                | 0                | 0                 | 0                 | 0                 | 1                 | 0                 | 0                 | 0                 | 0                 | 0                 | 0                 | 0                 | 0                | 0                | 0               | 0               |  |                |   |
| 468 | <i>Ctenoptilum vasava</i> (Moore, 1865)            | Hesperiidae | 0               | 0               | 0               | 0                | 0                | 0                | 0                | 0                | 0                 | 0                 | 0                 | 0                 | 0                 | 0                 | 1                 | 0                 | 0                 | 0                 | 0                 | 1                | 0                | 0               | 0               |  |                |   |
| 469 | <i>Ctenoptilum multiguttatum</i> de Nicéville,1890 | Hesperiidae | 1               | 0               | 0               | 0                | 0                | 0                | 0                | 0                | 0                 | 0                 | 0                 | 0                 | 0                 | 0                 | 0                 | 0                 | 0                 | 0                 | 0                 | 0                | 0                | 0               | 0               |  |                |   |
| 470 | <i>Tapena thwaitei</i> Moore, [1881]               | Hesperiidae | 1               | 0               | 0               | 0                | 0                | 0                | 0                | 0                | 0                 | 0                 | 0                 | 0                 | 0                 | 0                 | 0                 | 0                 | 0                 | 0                 | 0                 | 0                | 0                | 0               | 0               |  |                |   |
| 471 | <i>Erynnis pelias</i> Leech, 1891                  | Hesperiidae | 0               | 0               | 0               | 0                | 0                | 0                | 0                | 0                | 0                 | 0                 | 1                 | 0                 | 0                 | 0                 | 0                 | 0                 | 0                 | 1                 | 0                 | 0                | 0                | 0               | 0               |  |                |   |
| 472 | <i>Pyrgus maculatus</i> (Bremer & Grey, 1853)      | Hesperiidae | 0               | 0               | 0               | 0                | 0                | 0                | 0                | 0                | 0                 | 0                 | 0                 | 1                 | 0                 | 0                 | 0                 | 0                 | 0                 | 1                 | 0                 | 0                | 0                | 0               | 0               |  |                |   |
| 473 | <i>Carterocephalus abax</i> Oberthür, 1886         | Hesperiidae | 0               | 0               | 0               | 0                | 0                | 0                | 0                | 0                | 0                 | 0                 | 0                 | 0                 | 0                 | 0                 | 0                 | 0                 | 0                 | 0                 | 0                 | 0                | 0                | 0               | 1               |  |                |   |
| 474 | <i>Carterocephalus alcinoides</i> Lee, 1962        | Hesperiidae | 0               | 0               | 0               | 0                | 0                | 0                | 0                | 0                | 0                 | 0                 | 0                 | 0                 | 1                 | 0                 | 1                 | 0                 | 0                 | 0                 | 0                 | 0                | 0                | 0               | 0               |  |                |   |
| 475 | <i>Carterocephalus avanti</i> (de Nicéville, 1886) | Hesperiidae | 0               | 0               | 0               | 0                | 0                | 0                | 0                | 0                | 0                 | 0                 | 0                 | 0                 | 0                 | 0                 | 0                 | 0                 | 0                 | 0                 | 0                 | 0                | 0                | 0               | 1               |  |                |   |
| 476 | <i>Carterocephalus dieckmanni</i> Graeser, 1888    | Hesperiidae | 0               | 0               | 0               | 0                | 0                | 0                | 0                | 0                | 0                 | 0                 | 0                 | 0                 | 0                 | 0                 | 0                 | 0                 | 0                 | 1                 | 0                 | 0                | 0                | 0               | 0               |  |                |   |
| 477 | <i>Carterocephalus alcinus</i> Evans, 1939         | Hesperiidae | 0               | 0               | 0               | 0                | 0                | 0                | 0                | 0                | 0                 | 0                 | 0                 | 0                 | 1                 | 0                 | 0                 | 0                 | 0                 | 0                 | 0                 | 0                | 0                | 0               | 0               |  |                |   |
| 478 | <i>Astictopterus jama</i> C. & R. Felder, 1860     | Hesperiidae | 0               | 0               | 1               | 0                | 0                | 0                | 0                | 1                | 0                 | 0                 | 0                 | 0                 | 0                 | 0                 | 0                 | 0                 | 0                 | 1                 | 0                 | 1                | 0                | 0               | 0               |  |                |   |
| 479 | <i>Iambrix salsala</i> (Moore, 1865)               | Hesperiidae | 1               | 0               | 0               | 0                | 0                | 0                | 0                | 0                | 0                 | 0                 | 0                 | 0                 | 0                 | 0                 | 0                 | 0                 | 0                 | 0                 | 0                 | 0                | 0                | 0               | 0               |  |                |   |

| No. | Pollinating butterfly species                                      | Family      | I               |                 |                 | II               |                  |                  |                  |                  | III               |                   |                   |                   |                   |                   |                   |                   |                   |                   |                   |                  |                  |                 | IV             |  |  | V |
|-----|--------------------------------------------------------------------|-------------|-----------------|-----------------|-----------------|------------------|------------------|------------------|------------------|------------------|-------------------|-------------------|-------------------|-------------------|-------------------|-------------------|-------------------|-------------------|-------------------|-------------------|-------------------|------------------|------------------|-----------------|----------------|--|--|---|
|     |                                                                    |             | I <sub>A</sub>  |                 | I <sub>B</sub>  | II <sub>A</sub>  |                  |                  | II <sub>B</sub>  |                  | III <sub>A</sub>  |                   |                   |                   | III <sub>B</sub>  |                   |                   |                   |                   |                   |                   | IV <sub>A</sub>  |                  |                 | V <sub>A</sub> |  |  |   |
|     |                                                                    |             | I <sub>A1</sub> | I <sub>A2</sub> | I <sub>B1</sub> | II <sub>A1</sub> | II <sub>A2</sub> | II <sub>A3</sub> | II <sub>B1</sub> | II <sub>B2</sub> | III <sub>A1</sub> | III <sub>A2</sub> | III <sub>A3</sub> | III <sub>A4</sub> | III <sub>B1</sub> | III <sub>B2</sub> | III <sub>B3</sub> | III <sub>B4</sub> | III <sub>B5</sub> | III <sub>B6</sub> | III <sub>B7</sub> | IV <sub>A1</sub> | IV <sub>A2</sub> | V <sub>A1</sub> |                |  |  |   |
| 480 | <i>Ancistroides nigrita</i> (Latreille, 1824)                      | Hesperiidae | 1               | 0               | 1               | 0                | 0                | 0                | 0                | 0                | 0                 | 0                 | 0                 | 0                 | 0                 | 0                 | 0                 | 0                 | 0                 | 0                 | 0                 | 0                | 0                | 0               |                |  |  |   |
| 481 | <i>Stimula swinhoi</i> (Elwes & Edwards, 1897)                     | Hesperiidae | 1               | 0               | 0               | 0                | 0                | 0                | 0                | 0                | 0                 | 0                 | 0                 | 0                 | 0                 | 0                 | 0                 | 0                 | 0                 | 0                 | 0                 | 0                | 0                | 0               |                |  |  |   |
| 482 | <i>Notocrypta feisthamelii</i> (Boisduval, 1832)                   | Hesperiidae | 1               | 0               | 0               | 0                | 0                | 0                | 0                | 0                | 0                 | 1                 | 0                 | 1                 | 0                 | 0                 | 0                 | 0                 | 0                 | 0                 | 0                 | 0                | 0                | 0               |                |  |  |   |
| 483 | <i>Notocrypta curvifascia</i> (C. & R. Felder, 1862)               | Hesperiidae | 0               | 0               | 1               | 0                | 0                | 0                | 1                | 0                | 0                 | 0                 | 0                 | 1                 | 0                 | 0                 | 0                 | 0                 | 0                 | 0                 | 1                 | 0                | 0                | 0               |                |  |  |   |
| 484 | <i>Notocrypta paralysos</i> (Wood-Mason & de Nicéville, 1881)      | Hesperiidae | 1               | 0               | 1               | 0                | 0                | 0                | 0                | 0                | 0                 | 0                 | 0                 | 0                 | 0                 | 0                 | 0                 | 0                 | 0                 | 0                 | 1                 | 0                | 0                | 0               |                |  |  |   |
| 485 | <i>Udaspes folus</i> (Cramer, [1775])                              | Hesperiidae | 1               | 0               | 0               | 0                | 0                | 0                | 1                | 0                | 0                 | 0                 | 0                 | 0                 | 0                 | 0                 | 0                 | 0                 | 0                 | 0                 | 0                 | 0                | 0                | 0               |                |  |  |   |
| 486 | <i>Udaspes stellatus</i> (Oberthür, 1896)                          | Hesperiidae | 0               | 0               | 0               | 0                | 0                | 0                | 0                | 0                | 0                 | 0                 | 0                 | 0                 | 0                 | 0                 | 0                 | 0                 | 1                 | 0                 | 0                 | 0                | 0                | 0               |                |  |  |   |
| 487 | <i>Koruthaialos sindu</i> (Felder & Felder, 1860)                  | Hesperiidae | 1               | 0               | 0               | 0                | 0                | 0                | 0                | 0                | 0                 | 0                 | 0                 | 0                 | 0                 | 0                 | 0                 | 0                 | 0                 | 0                 | 0                 | 0                | 0                | 0               |                |  |  |   |
| 488 | <i>Erionota torus</i> Evans, 1941                                  | Hesperiidae | 1               | 0               | 0               | 0                | 0                | 0                | 1                | 0                | 0                 | 0                 | 0                 | 1                 | 0                 | 0                 | 0                 | 0                 | 0                 | 0                 | 0                 | 0                | 0                | 0               |                |  |  |   |
| 489 | <i>Erionota acroleuca</i> (Wood-Mason & de Nicéville, 1881)        | Hesperiidae | 1               | 0               | 0               | 0                | 0                | 0                | 0                | 0                | 0                 | 0                 | 0                 | 0                 | 0                 | 0                 | 0                 | 0                 | 0                 | 0                 | 0                 | 0                | 0                | 0               |                |  |  |   |
| 490 | <i>Matapa aria</i> (Moore, 1865)                                   | Hesperiidae | 0               | 0               | 0               | 0                | 0                | 0                | 1                | 0                | 0                 | 0                 | 0                 | 0                 | 0                 | 0                 | 0                 | 0                 | 0                 | 0                 | 0                 | 0                | 0                | 0               |                |  |  |   |
| 491 | <i>Suastus gremius</i> (Fabricius, 1798)                           | Hesperiidae | 1               | 0               | 0               | 0                | 0                | 0                | 1                | 0                | 0                 | 0                 | 0                 | 0                 | 0                 | 0                 | 0                 | 0                 | 0                 | 0                 | 0                 | 0                | 0                | 0               |                |  |  |   |
| 492 | <i>Arnetta atkinsoni</i> (Moore, 1878)                             | Hesperiidae | 1               | 0               | 0               | 0                | 0                | 0                | 0                | 0                | 0                 | 0                 | 0                 | 0                 | 0                 | 0                 | 0                 | 0                 | 0                 | 0                 | 0                 | 0                | 0                | 0               |                |  |  |   |
| 493 | <i>Scobura isota</i> (Swinhoe, 1893)                               | Hesperiidae | 1               | 0               | 0               | 0                | 0                | 0                | 0                | 0                | 0                 | 0                 | 0                 | 0                 | 0                 | 0                 | 0                 | 0                 | 0                 | 0                 | 0                 | 0                | 0                | 0               |                |  |  |   |
| 494 | <i>Zographetus satwa</i> (de Nicéville, 1884)                      | Hesperiidae | 0               | 0               | 0               | 0                | 0                | 0                | 1                | 0                | 0                 | 0                 | 0                 | 0                 | 0                 | 0                 | 0                 | 0                 | 0                 | 0                 | 0                 | 0                | 0                | 0               |                |  |  |   |
| 495 | <i>Gangara thyrasis</i> (Fabricius, 1775)                          | Hesperiidae | 0               | 0               | 1               | 0                | 0                | 0                | 0                | 0                | 0                 | 0                 | 0                 | 0                 | 0                 | 0                 | 0                 | 0                 | 0                 | 0                 | 0                 | 0                | 0                | 0               |                |  |  |   |
| 496 | <i>Hyarotis adrastus</i> (Stoll, [1780])                           | Hesperiidae | 1               | 0               | 0               | 0                | 0                | 0                | 0                | 0                | 0                 | 0                 | 0                 | 0                 | 0                 | 0                 | 0                 | 0                 | 0                 | 0                 | 0                 | 0                | 0                | 0               |                |  |  |   |
| 497 | <i>Isoteinon lamprospilus</i> C. & R. Felder, 1862                 | Hesperiidae | 0               | 0               | 0               | 0                | 0                | 0                | 0                | 0                | 0                 | 0                 | 0                 | 0                 | 0                 | 0                 | 0                 | 0                 | 0                 | 0                 | 1                 | 0                | 0                | 0               |                |  |  |   |
| 498 | <i>Ochus subvittatus</i> (Moore, 1878)                             | Hesperiidae | 1               | 0               | 1               | 0                | 0                | 0                | 1                | 0                | 0                 | 0                 | 0                 | 1                 | 0                 | 0                 | 0                 | 0                 | 0                 | 0                 | 0                 | 0                | 0                | 0               |                |  |  |   |
| 499 | <i>Aeromachus catocyanea</i> (Mabille, 1876)                       | Hesperiidae | 0               | 0               | 0               | 0                | 0                | 0                | 0                | 0                | 0                 | 0                 | 0                 | 0                 | 0                 | 0                 | 0                 | 0                 | 1                 | 0                 | 0                 | 0                | 0                | 0               |                |  |  |   |
| 500 | <i>Aeromachus kali</i> (de Nicéville, 1885)                        | Hesperiidae | 0               | 0               | 0               | 0                | 1                | 0                | 0                | 0                | 0                 | 0                 | 0                 | 1                 | 0                 | 0                 | 0                 | 0                 | 0                 | 0                 | 0                 | 0                | 0                | 0               |                |  |  |   |
| 501 | <i>Aeromachus stigmatus</i> (Moore, 1878)                          | Hesperiidae | 0               | 1               | 0               | 0                | 0                | 0                | 0                | 0                | 0                 | 0                 | 0                 | 1                 | 0                 | 0                 | 0                 | 0                 | 0                 | 0                 | 0                 | 0                | 0                | 0               |                |  |  |   |
| 502 | <i>Aeromachus jhora</i> (de Nicéville, 1885)                       | Hesperiidae | 1               | 0               | 0               | 0                | 0                | 0                | 1                | 0                | 0                 | 0                 | 0                 | 1                 | 1                 | 0                 | 1                 | 0                 | 0                 | 1                 | 0                 | 0                | 0                | 0               |                |  |  |   |
| 503 | <i>Aeromachus propinquus</i> Alphéraky, 1897                       | Hesperiidae | 0               | 0               | 0               | 0                | 0                | 0                | 0                | 0                | 0                 | 0                 | 0                 | 0                 | 1                 | 0                 | 0                 | 0                 | 0                 | 1                 | 0                 | 0                | 0                | 0               |                |  |  |   |
| 504 | <i>Halpe kumara</i> de Nicéville, 1885                             | Hesperiidae | 0               | 0               | 0               | 0                | 0                | 0                | 0                | 0                | 0                 | 0                 | 0                 | 1                 | 0                 | 0                 | 0                 | 0                 | 0                 | 0                 | 0                 | 0                | 0                | 0               |                |  |  |   |
| 505 | <i>Halpe knyozetti</i> Elwes & Edwards, 1897                       | Hesperiidae | 0               | 0               | 0               | 0                | 0                | 0                | 0                | 0                | 0                 | 0                 | 0                 | 1                 | 0                 | 0                 | 0                 | 0                 | 0                 | 0                 | 0                 | 0                | 0                | 0               |                |  |  |   |
| 506 | <i>Halpe handa</i> Evans, 1949                                     | Hesperiidae | 0               | 0               | 0               | 0                | 1                | 0                | 0                | 0                | 0                 | 0                 | 0                 | 0                 | 0                 | 0                 | 0                 | 0                 | 0                 | 0                 | 0                 | 0                | 0                | 0               |                |  |  |   |
| 507 | <i>Halpe wantona</i> Swinhoe, 1893                                 | Hesperiidae | 0               | 1               | 0               | 0                | 0                | 0                | 0                | 0                | 0                 | 0                 | 0                 | 0                 | 0                 | 0                 | 0                 | 0                 | 0                 | 0                 | 0                 | 0                | 0                | 0               |                |  |  |   |
| 508 | <i>Halpe zema</i> (Hewitson, 1877)                                 | Hesperiidae | 1               | 0               | 0               | 0                | 0                | 0                | 0                | 0                | 0                 | 0                 | 0                 | 0                 | 0                 | 0                 | 0                 | 0                 | 0                 | 0                 | 0                 | 0                | 0                | 0               |                |  |  |   |
| 509 | <i>Ampittia dioscorides</i> (Fabricius, 1793)                      | Hesperiidae | 1               | 0               | 0               | 0                | 0                | 0                | 1                | 0                | 0                 | 0                 | 0                 | 0                 | 0                 | 0                 | 0                 | 0                 | 0                 | 0                 | 0                 | 0                | 0                | 0               |                |  |  |   |
| 510 | <i>Ampittia virgata</i> (Leech, 1890)                              | Hesperiidae | 0               | 0               | 0               | 0                | 0                | 0                | 0                | 0                | 0                 | 0                 | 0                 | 0                 | 0                 | 0                 | 0                 | 0                 | 1                 | 0                 | 0                 | 0                | 0                | 0               |                |  |  |   |
| 511 | <i>Pithauria murdava</i> (Moore, 1865)                             | Hesperiidae | 0               | 0               | 0               | 0                | 0                | 0                | 1                | 0                | 0                 | 0                 | 0                 | 0                 | 0                 | 0                 | 0                 | 0                 | 0                 | 0                 | 0                 | 0                | 0                | 0               |                |  |  |   |
| 512 | <i>Pithauria linus</i> Evans, 1937                                 | Hesperiidae | 0               | 0               | 0               | 0                | 0                | 0                | 0                | 0                | 0                 | 0                 | 0                 | 0                 | 0                 | 0                 | 0                 | 0                 | 1                 | 0                 | 1                 | 0                | 0                | 0               |                |  |  |   |
| 513 | <i>Pithauria stramineipennis</i> Wood-Mason & de Nicéville, [1887] | Hesperiidae | 1               | 0               | 0               | 0                | 0                | 0                | 0                | 0                | 0                 | 0                 | 0                 | 0                 | 0                 | 0                 | 0                 | 0                 | 0                 | 0                 | 0                 | 0                | 0                | 0               |                |  |  |   |
| 514 | <i>Taractrocer a flavoides</i> Leech, 1892                         | Hesperiidae | 0               | 0               | 0               | 0                | 0                | 0                | 0                | 0                | 0                 | 0                 | 0                 | 0                 | 1                 | 0                 | 0                 | 1                 | 0                 | 1                 | 0                 | 0                | 0                | 0               |                |  |  |   |
| 515 | <i>Potanthus pseudomaesa</i> (Moore, 1881)                         | Hesperiidae | 0               | 0               | 0               | 0                | 0                | 0                | 1                | 0                | 0                 | 0                 | 0                 | 0                 | 0                 | 0                 | 0                 | 0                 | 0                 | 0                 | 0                 | 0                | 0                | 0               |                |  |  |   |
| 516 | <i>Potanthus flava</i> (Murray, 1875)                              | Hesperiidae | 0               | 0               | 0               | 0                | 0                | 0                | 0                | 0                | 0                 | 0                 | 0                 | 1                 | 0                 | 0                 | 0                 | 0                 | 0                 | 0                 | 0                 | 0                | 0                | 0               |                |  |  |   |
| 517 | <i>Potanthus mara</i> (Evans, 1932)                                | Hesperiidae | 0               | 0               | 0               | 0                | 0                | 0                | 0                | 0                | 0                 | 0                 | 0                 | 1                 | 0                 | 0                 | 0                 | 0                 | 0                 | 0                 | 0                 | 0                | 0                | 0               |                |  |  |   |
| 518 | <i>Potanthus trachala</i> (Mabille, 1878)                          | Hesperiidae | 0               | 0               | 0               | 0                | 0                | 0                | 0                | 0                | 0                 | 0                 | 0                 | 1                 | 0                 | 0                 | 0                 | 0                 | 0                 | 0                 | 0                 | 0                | 0                | 0               |                |  |  |   |
| 519 | <i>Potanthus palnia</i> (Evans, 1914)                              | Hesperiidae | 0               | 0               | 0               | 0                | 0                | 0                | 1                | 0                | 0                 | 0                 | 0                 | 0                 | 0                 | 0                 | 0                 | 0                 | 0                 | 0                 | 0                 | 0                | 0                | 0               |                |  |  |   |

| No. | Pollinating butterfly species                        | Family      | I               |                 |                 | II               |                  |                  |                  |                  | III               |                   |                   |                   |                   |                   |                   |                   |                   |                   |                   |                  |                  | IV              |  | V              |
|-----|------------------------------------------------------|-------------|-----------------|-----------------|-----------------|------------------|------------------|------------------|------------------|------------------|-------------------|-------------------|-------------------|-------------------|-------------------|-------------------|-------------------|-------------------|-------------------|-------------------|-------------------|------------------|------------------|-----------------|--|----------------|
|     |                                                      |             | I <sub>A</sub>  |                 | I <sub>B</sub>  | II <sub>A</sub>  |                  |                  | II <sub>B</sub>  |                  | III <sub>A</sub>  |                   |                   |                   | III <sub>B</sub>  |                   |                   |                   |                   |                   |                   |                  |                  | IV <sub>A</sub> |  | V <sub>A</sub> |
|     |                                                      |             | I <sub>A1</sub> | I <sub>A2</sub> | I <sub>B1</sub> | II <sub>A1</sub> | II <sub>A2</sub> | II <sub>A3</sub> | II <sub>B1</sub> | II <sub>B2</sub> | III <sub>A1</sub> | III <sub>A2</sub> | III <sub>A3</sub> | III <sub>A4</sub> | III <sub>B1</sub> | III <sub>B2</sub> | III <sub>B3</sub> | III <sub>B4</sub> | III <sub>B5</sub> | III <sub>B6</sub> | III <sub>B7</sub> | IV <sub>A1</sub> | IV <sub>A2</sub> | V <sub>A1</sub> |  |                |
| 520 | <i>Potanthus lydius</i> (Evans, 1934)                | Hesperiidae | 0               | 0               | 0               | 0                | 0                | 0                | 0                | 0                | 0                 | 0                 | 0                 | 1                 | 0                 | 0                 | 0                 | 0                 | 0                 | 0                 | 0                 | 0                | 0                |                 |  |                |
| 521 | <i>Potanthus nesta</i> (Evans, 1934)                 | Hesperiidae | 0               | 1               | 0               | 0                | 0                | 0                | 0                | 0                | 0                 | 0                 | 0                 | 0                 | 0                 | 0                 | 0                 | 0                 | 0                 | 0                 | 0                 | 0                | 0                |                 |  |                |
| 522 | <i>Cephrenes acalle</i> (Hopffer, 1874)              | Hesperiidae | 1               | 0               | 0               | 0                | 0                | 0                | 0                | 0                | 0                 | 0                 | 0                 | 0                 | 0                 | 0                 | 0                 | 0                 | 0                 | 0                 | 0                 | 0                | 0                |                 |  |                |
| 523 | <i>Telicota colon</i> (Fabricius, 1775)              | Hesperiidae | 1               | 0               | 0               | 0                | 0                | 0                | 1                | 0                | 0                 | 0                 | 0                 | 0                 | 0                 | 0                 | 0                 | 0                 | 0                 | 0                 | 0                 | 0                | 0                |                 |  |                |
| 524 | <i>Telicota ohara</i> (Plötz, 1883)                  | Hesperiidae | 0               | 0               | 0               | 0                | 0                | 0                | 1                | 0                | 0                 | 0                 | 0                 | 0                 | 0                 | 0                 | 0                 | 0                 | 0                 | 0                 | 0                 | 0                | 0                |                 |  |                |
| 525 | <i>Telicota linna</i> Evans,1949                     | Hesperiidae | 1               | 0               | 0               | 0                | 0                | 0                | 0                | 0                | 0                 | 0                 | 0                 | 0                 | 0                 | 0                 | 0                 | 0                 | 0                 | 0                 | 0                 | 0                | 0                |                 |  |                |
| 526 | <i>Ochlodes sagitta</i> Hemming, 1934                | Hesperiidae | 0               | 0               | 0               | 0                | 0                | 0                | 0                | 0                | 0                 | 0                 | 0                 | 0                 | 0                 | 0                 | 0                 | 0                 | 0                 | 1                 | 0                 | 0                | 1                |                 |  |                |
| 527 | <i>Ochlodes hasegawai</i> Chiba & Tsukiyama, 1996    | Hesperiidae | 0               | 0               | 0               | 0                | 0                | 0                | 0                | 0                | 0                 | 0                 | 0                 | 0                 | 0                 | 0                 | 0                 | 0                 | 0                 | 1                 | 0                 | 0                | 0                |                 |  |                |
| 528 | <i>Ochlodes bouddha</i> (Mabille, 1876)              | Hesperiidae | 0               | 0               | 0               | 0                | 0                | 0                | 0                | 0                | 1                 | 0                 | 0                 | 0                 | 0                 | 0                 | 0                 | 0                 | 0                 | 0                 | 0                 | 0                | 0                |                 |  |                |
| 529 | <i>Ochlodes thibetana</i> (Oberthür, 1886)           | Hesperiidae | 0               | 0               | 0               | 1                | 1                | 0                | 0                | 0                | 0                 | 1                 | 1                 | 1                 | 1                 | 0                 | 1                 | 0                 | 0                 | 1                 | 0                 | 1                | 1                |                 |  |                |
| 530 | <i>Parnara guttata</i> (Bremer & Grey, 1853)         | Hesperiidae | 0               | 0               | 1               | 0                | 0                | 0                | 0                | 0                | 0                 | 0                 | 0                 | 0                 | 1                 | 0                 | 0                 | 0                 | 0                 | 0                 | 0                 | 1                | 0                |                 |  |                |
| 531 | <i>Parnara batta</i> Evans, 1949                     | Hesperiidae | 0               | 0               | 0               | 0                | 0                | 0                | 0                | 0                | 0                 | 0                 | 1                 | 1                 | 1                 | 0                 | 0                 | 1                 | 0                 | 1                 | 0                 | 1                | 0                |                 |  |                |
| 532 | <i>Parnara ganga</i> Evans, 1937                     | Hesperiidae | 1               | 0               | 1               | 0                | 0                | 0                | 1                | 0                | 0                 | 0                 | 0                 | 0                 | 0                 | 0                 | 1                 | 0                 | 0                 | 0                 | 0                 | 0                | 0                |                 |  |                |
| 533 | <i>Parnara apostata</i> (Snellen, 1886)              | Hesperiidae | 0               | 0               | 1               | 0                | 0                | 0                | 1                | 0                | 0                 | 0                 | 0                 | 0                 | 0                 | 0                 | 0                 | 0                 | 0                 | 0                 | 0                 | 0                | 0                |                 |  |                |
| 534 | <i>Borbo cinnara</i> (Wallace, 1866)                 | Hesperiidae | 1               | 0               | 1               | 0                | 0                | 0                | 1                | 0                | 0                 | 0                 | 0                 | 0                 | 0                 | 0                 | 1                 | 0                 | 0                 | 0                 | 0                 | 0                | 0                |                 |  |                |
| 535 | <i>Pseudoborbo bevani</i> (Moore, 1878)              | Hesperiidae | 0               | 0               | 0               | 0                | 0                | 0                | 1                | 0                | 0                 | 0                 | 0                 | 1                 | 0                 | 0                 | 0                 | 0                 | 0                 | 0                 | 0                 | 0                | 0                |                 |  |                |
| 536 | <i>Polytremis lubricans</i> (Herrich-Schäffer, 1869) | Hesperiidae | 1               | 0               | 1               | 0                | 0                | 0                | 1                | 1                | 0                 | 0                 | 0                 | 1                 | 0                 | 0                 | 1                 | 0                 | 0                 | 0                 | 0                 | 0                | 0                |                 |  |                |
| 537 | <i>Polytremis eltola</i> (Hewitson, [1869])          | Hesperiidae | 1               | 0               | 0               | 0                | 1                | 0                | 0                | 0                | 0                 | 0                 | 0                 | 1                 | 0                 | 0                 | 0                 | 0                 | 0                 | 1                 | 0                 | 1                | 0                |                 |  |                |
| 538 | <i>Polytremis discreta</i> (Elwes & Edwards, 1897)   | Hesperiidae | 0               | 0               | 0               | 0                | 0                | 0                | 0                | 1                | 0                 | 0                 | 0                 | 1                 | 0                 | 0                 | 0                 | 0                 | 0                 | 0                 | 0                 | 1                | 0                |                 |  |                |
| 539 | <i>Polytremis theca</i> (Evans, 1937)                | Hesperiidae | 0               | 0               | 0               | 0                | 0                | 0                | 0                | 0                | 0                 | 0                 | 0                 | 1                 | 0                 | 0                 | 0                 | 0                 | 0                 | 0                 | 0                 | 0                | 0                |                 |  |                |
| 540 | <i>Polytremis nascens</i> (Leech, 1893)              | Hesperiidae | 0               | 0               | 0               | 0                | 0                | 0                | 0                | 0                | 0                 | 0                 | 0                 | 1                 | 0                 | 0                 | 0                 | 0                 | 0                 | 0                 | 0                 | 0                | 0                |                 |  |                |
| 541 | <i>Polytremis micropunctata</i> Huang, 2003          | Hesperiidae | 0               | 0               | 0               | 0                | 0                | 0                | 0                | 0                | 0                 | 0                 | 0                 | 1                 | 0                 | 0                 | 0                 | 0                 | 0                 | 0                 | 0                 | 0                | 0                |                 |  |                |
| 542 | <i>Polytremis caeruleascens</i> (Mabille, 1876)      | Hesperiidae | 0               | 0               | 0               | 0                | 0                | 0                | 0                | 0                | 0                 | 0                 | 1                 | 0                 | 0                 | 0                 | 0                 | 0                 | 0                 | 0                 | 0                 | 0                | 0                |                 |  |                |
| 543 | <i>Polytremis gotama</i> Sugiyama, 1999              | Hesperiidae | 0               | 0               | 0               | 0                | 0                | 0                | 0                | 0                | 0                 | 0                 | 0                 | 0                 | 0                 | 0                 | 0                 | 0                 | 0                 | 0                 | 0                 | 0                | 1                |                 |  |                |
| 544 | <i>Tsukiyamaia albimacula</i> Zhu, Chiba & Wu, 2016  | Hesperiidae | 0               | 0               | 0               | 0                | 0                | 0                | 0                | 0                | 0                 | 1                 | 0                 | 1                 | 0                 | 0                 | 0                 | 0                 | 0                 | 0                 | 0                 | 0                | 0                |                 |  |                |
| 545 | <i>Pelopidas mathias</i> (Fabricius, 1798)           | Hesperiidae | 0               | 0               | 0               | 0                | 0                | 0                | 1                | 0                | 0                 | 0                 | 0                 | 0                 | 0                 | 0                 | 0                 | 0                 | 0                 | 0                 | 0                 | 1                | 0                |                 |  |                |
| 546 | <i>Pelopidas agna</i> (Moore, [1866])                | Hesperiidae | 1               | 0               | 0               | 0                | 1                | 0                | 1                | 0                | 0                 | 0                 | 0                 | 0                 | 0                 | 0                 | 0                 | 0                 | 0                 | 0                 | 0                 | 0                | 0                |                 |  |                |
| 547 | <i>Pelopidas sinensis</i> (Mabille, 1877)            | Hesperiidae | 0               | 0               | 0               | 0                | 0                | 0                | 0                | 0                | 0                 | 0                 | 0                 | 1                 | 1                 | 0                 | 1                 | 0                 | 0                 | 1                 | 0                 | 1                | 0                |                 |  |                |
| 548 | <i>Pelopidas assamensis</i> (de Nicéville, 1882)     | Hesperiidae | 1               | 0               | 1               | 0                | 0                | 0                | 1                | 0                | 0                 | 0                 | 0                 | 0                 | 0                 | 0                 | 0                 | 0                 | 0                 | 0                 | 0                 | 0                | 0                |                 |  |                |
| 549 | <i>Baoris farri</i> (Moore, 1878)                    | Hesperiidae | 1               | 0               | 0               | 0                | 0                | 0                | 1                | 0                | 0                 | 0                 | 0                 | 0                 | 0                 | 0                 | 0                 | 0                 | 0                 | 0                 | 0                 | 0                | 0                |                 |  |                |
| 550 | <i>Baoris pagana</i> (de Nicéville, 1887)            | Hesperiidae | 1               | 0               | 0               | 0                | 0                | 0                | 0                | 0                | 0                 | 0                 | 0                 | 0                 | 0                 | 0                 | 0                 | 0                 | 0                 | 0                 | 0                 | 0                | 0                |                 |  |                |
| 551 | <i>Caltoris cahira</i> (Moore, 1877)                 | Hesperiidae | 1               | 0               | 0               | 0                | 0                | 0                | 0                | 0                | 0                 | 0                 | 0                 | 0                 | 0                 | 0                 | 0                 | 0                 | 0                 | 0                 | 1                 | 0                | 0                |                 |  |                |
| 552 | <i>Caltoris bromus</i> (Leech, 1894)                 | Hesperiidae | 1               | 0               | 1               | 0                | 0                | 0                | 1                | 0                | 0                 | 0                 | 0                 | 0                 | 0                 | 1                 | 1                 | 0                 | 0                 | 0                 | 0                 | 0                | 0                |                 |  |                |
| 553 | <i>Caltoris tulsii</i> (de Nicéville, 1883)          | Hesperiidae | 0               | 0               | 0               | 0                | 0                | 0                | 1                | 0                | 0                 | 0                 | 0                 | 0                 | 0                 | 0                 | 0                 | 0                 | 0                 | 0                 | 0                 | 0                | 0                |                 |  |                |
| 554 | <i>Iton watsonii</i> (de Nicéville, 1890)            | Hesperiidae | 1               | 0               | 0               | 0                | 0                | 0                | 0                | 0                | 0                 | 0                 | 0                 | 0                 | 0                 | 0                 | 0                 | 0                 | 0                 | 0                 | 0                 | 0                | 0                |                 |  |                |
|     | Total species count                                  | —           | 304             | 226             | 223             | 196              | 200              | 196              | 197              | 187              | 136               | 154               | 154               | 191               | 123               | 111               | 143               | 97                | 122               | 195               | 134               | 124              | 87               | 160             |  |                |
